# Supplementary material for: Impact of community-based forest restoration on stand structural attributes, aboveground biomass and carbon stock compared to state-managed forests in tropical ecosystems of Sri Lanka
Source: PeerJ journal article supplement (doi:10.7717/peerj.18176), 2024-09-26
Supplement: State_and_community_managed_forests_Raw_data.zip [file Aludeniyaya State own.xlsx]

## Sheet: Sheet1
12.6m					stump		bush			3m (1.5>5)			3m (30>1.5)			3m (30<)			Inasive spp
tree	DBh (2012)	biomass 2012	dbh (2018)		2012	2018	spp	2012	2018	spp	2012	2018	spp	2012	2018	Spp	2012	2018	spp	2012	2018
welan	31	417.305	32.4	464.468	0		indi	2		nelli	3.2		gammalu	2	4	Bowitiya	8	12	Lantana	8	16
bala	7.5	11.0133	8.4	13.1775						karanda	2.6								mana	6	18
keppetiya	7.3	10.6773	8.6	13.8033						nelli	2.5								Gini grass	5	9
kos	34.8	551.326	36	597.6						gketakela	3.1
kos	38.7	708.652	40.2	774.497						ginusupu	2.9
makulla	7	10.272	8.3	12.8843						ginisiriya	1.2
makulla	5.8	9.83642	7.2	10.529						gammalu		1.8
kappetiya	5.7	9.88574	6.8	10.0677						kobba		1.6
bala	5.6	9.94824	7.1	10.3939
keppetiya	6	9.7773	6.8	10.0677
kos	43	905.336	43.8	944.616
kos	10.5	22.3764	11.6	29.5132
kos	16.4	79.3069	18.2	105.804
kos	13	40.9014	14.9	60.4863
kos	5.5	10.0239	7.1	10.3939
kos	6	9.7773	7.7	11.402
kos	5.6	9.94824	7	10.272
kos	6.3	9.7874	7.2	10.529
kos	7	10.272	8.3	12.8843
kos	7.4	10.8387	8.9	14.8408
kos	11.8	30.982	13	40.9014
keppetiya	5.4	10.1127	6.7	9.98528
gonna	5	10.5998	6.4	9.81712
gonna	8.2	12.6043	9.7	18.1871
welan	15.4	66.4305	16.8	84.8263
keppetiya	13.4	44.6294	14.9	60.4863
keppetiya	10.2	20.7066	11.7	30.241
keppetiya	7.6	11.2011	9	15.213
keppetiya	13	40.9014	15.4	66.4305
kos	35.5	578.089	37	637.611
mora	9.6	17.7227	11.2	26.7336
kohukirilla	8.5	13.4838	10.2	20.7066
kohukirilla	8	12.0839	9.6	17.7227
kohukirilla	5.8	9.83642	7.3	10.6773
makulla	16	73.9983	17.5	94.9923
makulla	15.4	66.4305	16.8	84.8263
makulla	13.2	42.739	14.7	58.2008
keppetiya	6.8	10.0677	8	12.0839
makulla	6.7	9.98528	8.3	12.8843
kohukirilla	14.8	59.337	16	73.9983
halmilla	10.8	24.1647	12.4	35.7046
makulla		4023.37	6.4	9.81712
makulla			5.6	9.94824
				4570.22

## Sheet: Sheet2
12.6m					stump		bush			3m (1.5>5)			3m (30>1.5)			3m (30<)			Inasive spp
tree	DBh (2012)	biomass 2012	dbh (2018)		2012	2018	spp	2012	2018	spp	2012	2018	spp	2012	2018	Spp	2012	2018	spp	2012	2018
ketakela	21.3	161.441	0		3		0			bolpana	1.5	4.2	bolpana	4	9	bolpana	12	21	0
ketakela	18.6	112.271	20.1	138.403						migonkarapincha	1.1
damunu	10.8	24.1647	12	32.5035						bolpana	1.1	3.4
damunu	12.5	36.5378	13.8	48.5681						migonkarapincha	2.6
welan	8.4	13.1775	10.2	20.7066						migonkarapincha		1.8
ketakela	11	25.4228	12.7	38.2437						migonkarapincha		2.5
ketakela	14.3	53.7879	15.8	71.423						mora	2.1	4.9
ketakela	21	155.504	0							mora	2.6
damunu	12.4	35.7046	13.7	47.5637
damunu	10.5	22.3764	11.8	30.982
damunu	9	15.213	10.7	23.5554
welan	5.6	9.94824	7.2	10.529
welan	5	10.5998	6.8	10.0677
kalawel	5.2	10.3299	5.7	9.88574
kom	12	32.5035	13.3	43.6776
kalawel	6.2	9.77086	6.6	9.91606
damunu	74.4	3079.87	75.7	3197.89
		3808.62		3733.92

## Sheet: Sheet3
12.6m					stump		bush			3m (1.5>5)			3m (30>1.5)			3m (30<)			Inasive spp
tree	DBh (2012)	Biomass2012	dbh (2018)	biomass 2018	2012	2018	spp	2012	2018	spp	2012	2018	spp	2012	2018	Spp	2012	2018	spp	2012	2018
katakela	40.3	778.992	41.4	829.306	4	5	0			welan	3.6		welan	6	8	thora	2	5	lantana	5	20
katakela	9.4	16.8335	10.8	24.1647						welan	3.1	4.6							mana	45	55
damunu	7.8	11.6161	10	19.6593						gammalu	2.6	2.9
katakela	13.2	42.739	14.8	59.337						gammalu		1.8
damunu	10.3	21.25	12.1	33.284						welan		1.6
welan	13.2	42.739	14.9	60.4863
katakela	16.4	79.3069	17.9	101.091
welan	41.3	824.667	42.8	895.648
seru	10.3	21.25	11.7	30.241
seru	7.8	11.6161	8.9	14.8408
damunu	12.4	35.7046	13.9	49.5857
kirikon	34.1	525.209	34.8	551.326
kalawel	5.1	10.4583	5.6	9.94824
radaliya	20.3	142.111	21.2	159.449
welan	34	521.53	35	558.907
gaduba	10.3	21.25	3	16.1964
kaliya	8.2	12.6043	8.7	14.136
radaliya	5.6	9.94824	6.8	10.0677
radaliya	6.4	9.81712	7.9	11.8434
welan		3139.64	5.6	9.94824
kalawel			5.1	10.4583
				3469.92

## Sheet: Sheet4
12.6m					stump		bush			3m (1.5>5)			3m (30>1.5)			3m (30<)			Inasive spp
tree	DBh (2012)	bimass 2012	dbh (2018)	biomass2018	2012	2018	spp	2012	2018	spp	2012	2018	spp	2012	2018	Spp	2012	2018	spp	2012	2018
kaliya	6.4	9.81712	7.6	11.2011	0		indi	1		0			0			bowitiya	3	3	rila thana	25	40
damunu	5.7	9.88574	7.2	10.529															podisingnomaran	45	30
gaduba	11.3	27.4087	13	40.9014															lantana	10	20
kaluwara	6.8	10.0677	7.9	11.8434
damunu	19.2	122.368	20.7	149.685
burutha	9.5	17.2715	11	25.4228
burutha	16.3	77.96	17.8	99.5467
kalawel	5.8	9.83642	7.2	10.529
gaduba	7.7	11.402	8.4	13.1775
welan	7.4	10.8387	8.9	14.8408
damunu	16.4	79.3069	0
damunu	8.3	12.8843	9.8	18.6647
damunu	59.5	1886.09	60.2	1935.62
welan	11.4	28.097	12.8	39.1164
damunu	7.4	10.8387	9.1	15.5984
kon	42.2	866.9	43.8	944.616
katakela	38.9	717.26	39.7	752.219
katakela	23.4	206.323	24.5	232.151
damunu	21.6	167.497	22.8	192.907
welan	8.3	12.8843	10	19.6593
damunu	22.3	182.089	22.9	195.11
karapincha	7.3	10.6773	8.9	14.8408
damunu	7.1	10.3939	8.8	14.4818
		4498.09		4762.66

## Sheet: Sheet5
12.6m					stump		bush			3m (1.5>5)			3m (30>1.5)			3m (30<)			Inasive spp
tree	DBh (2012)	biomass 2012	dbh (2018)		2012	2018	spp	2012	2018	spp	2012	2018	spp	2012	2018	Spp	2012	2018	spp	2012	2018
welan	7.8	11.6161	9.3	16.4086	4	4	0			gongotu	1.1		migonkarapincha	12	23	migonkarapincha	28	49	hawarinuga	0.5	1
damunu	46.8	1099.42	47.9	1159.15						gongotu	1.8
damunu	8.2	12.6043	9.7	18.1871						bolpana	0.7
welan	8.4	13.1775	9.5	17.2715						yakinaran	1.5
damunu	11.4	28.097	13	40.9014						migonkarapincha		1.9
welan	5.9	9.80028	7.2	10.529						migonkarapincha		2.3
kon	33.2	492.578	34.8	551.326						bolpana		1.6
damunu	37.8	670.568	38.7	708.652
seru	8.4	13.1775	10	19.6593
karapincha	5.8	9.83642	7.4	10.8387
nitol	5.4	10.1127	7.2	10.529
damunu	11.3	27.4087	12.8	39.1164
dmunu	27.5	310.691	29.2	360.46
kon	9.4	16.8335	10.8	24.1647
damunu	5.8	9.83642	7.2	10.529
nitol	7.9	11.8434	9.4	16.8335
		2747.6		3014.56

## Sheet: Sheet6
12.6m					stump		bush			3m (1.5>5)			3m (30>1.5)			3m (30<)			Inasive spp
tree	DBh (2012)	bimass 2012	dbh (2018)	bimass 2018	2012	2018	spp	2012	2018	spp	2012	2018	spp	2012	2018	Spp	2012	2018	spp	2012	2018
galsiyabala	28.7	345.427	30	385.197	0		0			gongotu	1.1	3.2	gongotu	1		3			katakalu	2	7
seru	8.9	14.8408	10.2	20.7066						gongotu	1	2.8							gall	1	5
mora	9.3	16.4086	10.8	24.1647						gongotu	1.1	2.9
keppatiya	5.7	9.88574	7.3	10.6773						gongotu	1.1	2.9
welan	6.5	9.86	7.8	11.6161
seru	9.7	18.1871	11	25.4228
welan	8.7	14.136	9.7	18.1871
mora	10.4	21.8066	11.6	29.5132
welan	12.5	36.5378	13.9	49.5857
makulla	28.6	342.46	30	385.197
galsiyabala	32	450.729	32.9	481.938
keppatiya	5.4	10.1127	6.3	9.7874
keppatiya	6.7	9.98528	7.8	11.6161
keppatiya	7.3	10.6773	8.4	13.1775
keppatiya	7.1	10.3939	8.6	13.8033
keppatiya	8.2	12.6043	9.5	17.2715
keppatiya	6.3	9.7874	7.6	11.2011
keppatiya	7.1	10.3939	8.6	13.8033
keppatiya	6.3	9.7874	7.7	11.402
keppatiya	6.8	10.0677	7.9	11.8434
keppatiya	9.1	15.5984	10.5	22.3764
keppatiya	6.3	9.7874	7.9	11.8434
keppatiya	5.8	9.83642	6.7	9.98528
keppatiya	8.4	13.1775	9.3	16.4086
		1422.49		1616.73

## Sheet: Sheet7
12.6m					stump		bush			3m (1.5>5)			3m (30>1.5)			3m (30<)			Inasive spp
tree	DBh (2012)	biomass 2012	dbh (2018)	bimass 2018	2012	2018	spp	2012	2018	spp	2012	2018	spp	2012	2018	Spp	2012	2018	spp	2012	2018
dambhu	6.7	9.98528	8	12.0839	0		0			thamiliya	4.6		dimbi biju	5	8	dimbi biju	3	12	ginigrass	2	8
damunu	5.6	9.94824	6.8	10.0677						thamiliya	1.5	2.7							katakalu	4	10
damunu	10.5	22.3764	11.7	30.241						thamiliya	3.4	4.1							mist	1	6
damunu	7.8	11.6161	9	15.213						kududaula	3.1	4
katakela	19.6	129.363	20.8	151.611						thamiliya	3.4	3.8
katakela	11.3	27.4087	12.5	36.5378						migonkarapincha	2.9	3.7
katakela	6.1	9.7675	7.8	11.6161						wellangiriya	2.3	0
andara	14.8	59.337	15.6	68.9004						thamiliya	1.7	0
seru	6.4	9.81712	7.8	11.6161
welan	14.5	55.968	15.8	71.423
damunu	7.2	10.529	8.9	14.8408
ketakala	38.3	691.594	39.7	752.219
damunu	8.7	14.136	10	19.6593
andara	6.3	9.7874	7.9	11.8434
damunu	48.5	1192.41	49.8	1266.08
damunu	14.5	55.968	0
damunu	8.4	13.1775	9.6	17.7227
damunu	49.3	1237.48	50.7	1318.39
damunu	27.3	305.086	28.9	351.4
seru	7.4	10.8387	8.6	13.8033
keppetiya	5.4	10.1127	6.7	9.98528
damunu		3896.71	5.2	10.3299
keppetiya			5.3	10.2147
				4215.81

## Sheet: Sheet8
12.6m					stump		bush			3m (1.5>5)			3m (30>1.5)			3m (30<)			Inasive spp
tree	DBh (2012)	biomass 2012	dbh (2018)	biomass 2019	2012	2018	spp	2012	2018	spp	2012	2018	spp	2012	2018	Spp	2012	2018	spp	2012	2018
kaya	7.5	11.0133	8.7	14.136	3		0			kudu daula	3.8		kududaula	1	4	nolaba	3	5	mana	5	15
kaya	25.4	254.468	26.9	294.035						kudu daula	4.1
kaya	15.4	66.4305	16.9	86.2391						welan	3.2	4.8
kaya	9.4	16.8335	10.8	24.1647						welan		1.8
damunu	32.5	467.936	33.7	510.574
kaya	12.5	36.5378	16.9	86.2391
kaya	17.5	94.9923	18.7	113.921
katakela	35.9	593.672	37.1	641.685
kaya	11.4	28.097	12.8	39.1164
kaya	12.3	34.8846	13.8	48.5681
kaya	6.7	9.98528	8.2	12.6043
kaya	11.4	28.097	12.9	40.0023
kaya	8.4	13.1775	10	19.6593
damunu	27.4	307.882	28.8	348.407
damunu	21.4	163.447	22.7	190.717
kaya	14.3	53.7879	15.9	72.7041
kaya	7.8	11.6161	9	15.213
		2192.86		2557.99

## Sheet: Sheet9
12.6m					stump		bush			3m (1.5>5)			3m (30>1.5)			3m (30<)			Inasive spp
tree	DBh (2012)	biomass 2012	dbh (2018)	biomass 2018	2012	2018	spp	2012	2018	spp	2012	2018	spp	2012	2018	Spp	2012	2018	spp	2012	2018
akeshiya	49.5	1248.88	51.7	1377.77	0	2	0			welan	2.6		yakinaran	5	9	yakinaran	10	10	lantana	20	30
akeshiya	43.3	919.967	44.5	979.677						kon	2.2	3.3
akeshiya	56.5	1681.09	57.9	1775.28						kon	2.2	3.1
kohomba	35.6	581.965	36.2	605.497						tharana	1.6	2.1
damunu	54.3	1538.3	54.7	1563.79						tharana	1.2	2
damunu	23.2	201.798	24.7	237.018						yakinaran	1.6	2
damunu	7.8	11.6161	9	15.213						tharana	2.1	2.8
damunu	11.5	28.7985	12.9	40.0023						yakinaran		4.1
damunu	10.7	23.5554	12	32.5035						yakinaran		1.6
damunu	9.6	17.7227	11	25.4228
damunu	5.5	10.0239	6.8	10.0677
damunu	6.4	9.81712	7.6	11.2011
kalumadiriya	7	10.272	8.3	12.8843
kohomba		6283.82	5.4	10.1127
milla			5.2	10.3299
akeshia			5.8	9.83642
seru			6	9.7773
milla			5.3	10.2147
damunu			5.4	10.1127
				6746.71

## Sheet: Sheet10
12.6m						stump		bush			3m (1.5>5)			3m (30>1.5)			3m (30<)			Inasive spp
tree	DBh (2012)	biomass2012	dbh (2018)	biomass 18		2012	2018	spp	2012	2018	spp	2012	2018	spp	2012	2018	Spp	2012	2018	spp	2012	2018
makulla	14.4	54.8714	15.9	72.7041		4	4	0			kudu daula	2.4	3.1	kududaula	4	6	monarakudumbiya	78	62	podisinghomaran	3	10
welan	37.4	653.984	38.9	717.26							burulla	1.5	2.1							katakalu	1	8
akeshiya	17.5	94.9923	18.8	115.584							bombu	1.8	2.3
akeshiya	42	857.422	43.5	929.787							kudu daula	4.6
keppetiya	6.4	9.81712	6.9	10.1633							milla	3.3	3.9
bala	7.3	10.6773	8.5	13.4838							bolpana		1.8
makulla	11.4	28.097	12.6	37.3842							bala		2.1
halmilla	38.6	704.368	39.9	761.091
bhukenda	35.4	574.226	36.8	629.503
halmilla	15.4	66.4305	17	87.665
keppetiya	5.6	9.94824	6.8	10.0677
tharana	6.4	9.81712	7.5	11.0133
kakuna	21.4	163.447	22.4	184.226
kakuna	14.4	54.8714	15.5	67.6589
kakuna	7.7	11.402	8.6	13.8033
bala	13.5	45.5943	15	61.6488
badulla	9.4	16.8335	10.7	23.5554
		3366.8		3746.6
