# Supplementary material for: Impact of community-based forest restoration on stand structural attributes, aboveground biomass and carbon stock compared to state-managed forests in tropical ecosystems of Sri Lanka
Source: PeerJ journal article supplement (doi:10.7717/peerj.18176), 2024-09-26
Supplement: State_and_community_managed_forests_Raw_data.zip [file aludeniyayacommunity.xlsx]

## Sheet: Sheet1
12.6m					stump		bush			3m (1.5>5)			3m (30>1.5)			3m (30<)			Inasive spp
tree	DBh (2012)	biomass 2012	dbh (2018)	biomass 2018	2012	2018	spp	2012	2018	spp	2012	2018	spp	2012	2018	Spp	2012	2018	spp	2012	2018
kaya	8.5	13.4838	10.2	20.7066	3	0	indi	2		nelli		3.8	podisinghomaran	3	12	Balunaguta	25	46	lantana	0.08	0
kaya	9.7	18.1871	11.8	30.982						nelli		4.1							naththa suriya	0.07	7
kaya	9.8	18.6647	11.2	26.7336						nelli		2.8							mana	0.3	10
kaya	9.5	17.2715	11.2	26.7336						nelli		3.8							gini grass	0.12	0
kaya	18.7	113.921	20	136.568						nelli		3.2							podisinghomaran	0.03	0
kaya	9.3	16.4086	10.7	23.5554						ginisapu		4.8
kaya	9.2	15.9969	10.8	24.1647
kaya	5.7	9.88574	7	10.272
kaya	8.6	13.8033	10	19.6593
kaya	9.8	18.6647	11	25.4228
kaya	9.5	17.2715	10.9	24.7872
kaya	8.7	14.136	9.9	19.1554
		287.695		388.741

## Sheet: Sheet2
12.6m					stump		bush			3m (1.5>5)			3m (30>1.5)			3m (30<)			Inasive spp
tree	DBh (2012)	biomass 2012	dbh (2018)	biomass 2018	2012	2018	spp	2012	2018	spp	2012	2018	spp	2012	2018	Spp	2012	2018	spp	2012	2018
kiri kon	28.9	351.4	29.8	378.934	0		0			nelli		3.6	gammalu	2	14	gini grass	1	85	naththa S	12	10
damunu	10	19.6593	11.4	28.097						nelli		3.2							lanthana	7	2
damunu	9.8	18.6647	10.6	22.9593						nelli		1.9							Gini grass	65	0
seru	8.7	14.136	9.5	17.2715						nelli		2.6
seru	9.4	16.8335	10.7	23.5554						nelli		3.6
seru	9.3	16.4086	10.5	22.3764						nelli		3.1
kaya		437.102	5.3	10.2147						welan	4.2
kaya			5	10.5998						welan	3.6	4.8
damunu			5.3	10.2147
				524.223

## Sheet: Sheet3
12.6m					stump		bush			3m (1.5>5)			3m (30>1.5)			3m (30<)			Inasive spp
tree	DBh (2012)	biomass 2012	dbh (2018)	biomass 2018	2012	2018	spp	2012	2018	spp	2012	2018	spp	2012	2018	Spp	2012	2018	spp	2012	2018
kos ata	8.6	13.8033	9.8	18.6647	0		0			nelli		2.1		0	23	hulan thala	2	78	gini grass	0.7	0
unknown	12.5	36.5378	13.6	46.5724						nelli		3.2							naththa suriya	0.2	20
dummala	69.8	2680.11	70.7	2756.13						nelli		2.7							rila thana	3	0
kos ata	17.6	96.4973	19.2	122.368						nelli		3.5							balu naguta	3	2
goraka	25.5	257.014	26.8	291.305						ginisapu		4.1							lantana	2	0
dummala	7.5	11.0133	8.7	14.136						nelli		3.4
daul kurundu	21	155.504	22.7	190.717						damba	4.6
daul kurundu	52.6	1432.33	53.4	1481.72
kos ata	16.3	77.96	17.8	99.5467
dummala	8	12.0839	9.3	16.4086
kos ata	13.2	42.739	14.6	57.0778
dummala	32	450.729	33.8	514.213
dummala	18.6	112.271	20.1	138.403
welikorkaha	7.8	11.6161	8.9	14.8408
dummala	34.6	543.798	36.3	609.465
welan	24.6	234.578	25.9	267.328
kos ata	6.4	9.81712	7.8	11.6161
kos ata	18.7	113.921	20.1	138.403
dummala	44.6	984.738	46	1056.98
dummala	35.4	574.226	36.8	629.503
dummala	71.6	2833.22	72.8	2937.66
bala		10684.5	5.8	9.83642
bala			5.4	10.1127
kos ata			5.5	10.0239
				11443

## Sheet: Sheet4
12.6m					stump		bush			3m (1.5>5)			3m (30>1.5)			3m (30<)			Inasive spp
tree	DBh (2012)	biomass 2012	dbh (2018)	biomass 2018	2012	2018	spp	2012	2018	spp	2012	2018	spp	2012	2018	Spp	2012	2018	spp	2012	2018
makulla	7.8	11.6161	8.8	14.4818	5	5				gammalu	2.5		bowitiya	8	12	thora	6	98	lantana	6	0
gongotu	8.7	14.136	9.3	16.4086						karanda		1.9							mana	35	10
godapara	13.6	46.5724	14.8	59.337						nelli	4.6								gini grass	20	0
keppetiya	9.7	18.1871	10.5	22.3764						nelli		3.8							naththasuriya	10	5
gongotu	10.7	23.5554	11.5	28.7985						nelli		2.9
diyalabu	12.8	39.1164	13.7	47.5637						nelli		3.6
gongotu	6.8	10.0677	8.2	12.6043						nelli		2.6
gongotu	6.7	9.98528	8	12.0839						nelli		4.1
unknown	12.7	38.2437	13.7	47.5637						nelli		3.9
gongotu	10.7	23.5554	12.2	34.0777						karanda		3.1
nitol	6.9	10.1633	7.7	11.402						nelli		4.7
gon ata	9.6	17.7227	11.1	26.0716
nawa	19.2	122.368	20.1	138.403
kenda	17.6	96.4973	19.4	125.839
halmilla	6.8	10.0677	7.6	11.2011
gongotu	9.5	17.2715	10.7	23.5554
welan	18.9	117.261	20.2	140.25
kanda	27.6	313.513	29.4	366.565
halmilla	8.2	12.6043	9.8	18.6647
gongotu	6.7	9.98528	7.9	11.8434
gongotu	8.7	14.136	10.1	20.1764
welan	17.4	93.5005	18.6	112.271
gongotu	8.5	13.4838	9.3	16.4086
gongotu	6	9.7773	7.8	11.6161
halmilla	6.7	9.98528	8.2	12.6043
ahatu	23.8	215.531	25	244.418
ahatu	22.6	188.54	23.9	217.866
		1507.44		1804.45

## Sheet: Sheet5
12.6m					stump		bush			3m (1.5>5)			3m (30>1.5)			3m (30<)			Inasive spp
tree	DBh (2012)	biomass2012	dbh (2018)	biom	2012	2018	spp	2012	2018	spp	2012	2018	spp	2012	2018	Spp	2012	2018	spp	2012	2018
halmilla	5.8	9.83642	7.2	10.529	0		indi	2		nelli	3.7		pera	6	18	Bowitiya	8	102	Lantana	50	0
kohu kirilla	5.4	10.1127	6.8	10.0677						ginisiriya	3.2								Mana	20	5
keppetiya	6.1	9.7675	7.3	10.6773						karanda		2.6							Gini grass	10	0
nitol	28.7	345.427	29.5	369.638						nelli		2.1
keppetiya	5.8	9.83642	6.7	9.98528						nelli		1.8
suriyamara	27.8	319.197	28.6	342.46						nelli		2.3
kanu	27.3	305.086	28.9	351.4						nelli		3.6
seru	5.2	10.3299	6.4	9.81712						ginisiriya		4.1
galmoratu	6.7	9.98528	7.6	11.2011						batu		1.8
damunu	10.6	22.9593	12	32.5035
halmilla		1052.54	5.3	10.2147
halmilla			5.2	10.3299
				1178.82

## Sheet: Sheet6
12.6m					stump		bush			3m (1.5>5)			3m (30>1.5)			3m (30<)			Inasive spp
tree	DBh (2012)	Biomass 2012	dbh (2018)	biomass 2019	2012	2018	spp	2012	2018	spp	2012	2018	spp	2012	2018	Spp	2012	2018	spp	2012	2018
kirikon	20.3	142.111	21.8	171.601	0		indi	1		nelli	4.2		0	21	41	podisingnomaran	10	62	ginigrass	14	5
walikorakaha	22.4	184.226	23.5	208.605						nelli		3.3							rila thana	56	5
keppetiya	5.8	9.83642	6.5	9.86						nelli		1.9							lantana	12	2
keppetiya	6.3	9.7874	7.5	11.0133						nelli		2.4							podisinm	3	0
mora	12.8	39.1164	13.7	47.5637						nelli		4.6							illuk	7	0
dumala	11.5	28.7985	13.2	42.739						karanda		2.6
poropalu	12.7	38.2437	14	50.6165						thibbatu		1.8
dun	39.7	752.219	40.5	788.021						hulanhik	4.2
keppetiya	7.4	10.8387	8.7	14.136						hulanhik	3.8
walikorakaha	17.6	96.4973	18.9	117.261
dumala	10.3	21.25	12.2	34.0777
keppetiya	7.9	11.8434	8.7	14.136
walla patta	7.3	10.6773	8.4	13.1775
dumala	10.6	22.9593	12.7	38.2437
keppetiya	6.5	9.86	7.4	10.8387
kirikon	6.2	9.77086	7.9	11.8434
walla patta	24.7	237.018	25.4	254.468
keppetiya	6.9	10.1633	7.3	10.6773
dumala	18	102.649	20.3	142.111
bala	21.8	171.601	23	197.326
gon ata	9.9	19.1554	11.3	27.4087
gon ata	5.4	10.1127	6.6	9.91606
kalawel	7.2	10.529	7.6	11.2011
gon ata		1959.26	5.4	10.1127
kalawel			5.1	10.4583
bala			5.4	10.1127
keppetiya			5.4	10.1127
				2277.64

## Sheet: Sheet7
12.6m					stump		bush			3m (1.5>5)			3m (30>1.5)			3m (30<)			Inasive spp
tree	DBh (2012)	biomass 2012	dbh (2018)	biomass 2019	2012	2018	spp	2012	2018	spp	2012	2018	spp	2012	2018	Spp	2012	2018	spp	2012	2018
mora	31.3	427.194	32.8	478.418	4	4	0			karada		4.1	gammalu	3	27	thora	14	109	naththasuriya	40	10
kappetiya	6.4	9.81712	7.3	10.6773						karada		3.4							mana	25	0
mora	12.3	34.8846	13.7	47.5637						nelli		2.8
kappetiya	6.7	9.98528	7.2	10.529						karanda		3.3
kappetiya	5.8	9.83642	6.3	9.7874						nelli		3
kappetiya	6.4	9.81712	6.9	10.1633						nelli		3.2
welan	23	197.326	23.9	217.866						ginisiriya	4.9
mora		698.861	5.3	10.2147						gaduba	4.6
welan			6	9.7773						gaduba	3.8
mora			5.7	9.88574						hulanhik	4.1
				814.882

## Sheet: Sheet8
12.6m					stump		bush			3m (1.5>5)			3m (30>1.5)			3m (30<)			Inasive spp
tree	DBh (2012)	biomass 2012	dbh (2018)	biomass 2019	2012	2018	spp	2012	2018	spp	2012	2018	spp	2012	2018	Spp	2012	2018	spp	2012	2018
welan	31.3	427.194	32.8	478.418	6	6	0	0	0	welan	2.5	2.9	gammalu	3	18	hulanthala	16	64	lantana	30	10
bala	13.6	46.5724	14.9	60.4863						welan	1.7	2.2							mana	40	30
keppetiya	6.6	9.91606	7.9	11.8434						nelli	2.4	2.9
kohukirilla	8.7	14.136	9.9	19.1554						nelli	1.5	1.8
welan	13.7	47.5637	15	61.6488						nelli		2.6
kunumella	5.1	10.4583	6.8	10.0677						nelli		4.6
damunu	11.4	28.097	12.7	38.2437						kuratiya	4.6
damunu	22.4	184.226	23.8	215.531						nelli	4.8
keppetiya	13.4	44.6294	14.1	51.6605
mora	9.7	18.1871	11	25.4228
gonna	16.1	75.3057	17	87.665
welan	41.3	824.667	41.8	847.998
damunu	7.8	11.6161	9.2	15.9969
damunu	9.1	15.5984	10	19.6593
damunu		1758.17	5.2	10.3299
				1954.13

## Sheet: Sheet9
12.6m					stump		bush			3m (1.5>5)			3m (30>1.5)			3m (30<)			Inasive spp
tree	DBh (2012)	bimass 2012	dbh (2018)	biomass 2019	2012	2018	spp	2012	2018	spp	2012	2018	spp	2012	2018	Spp	2012	2018	spp	2012	2018
teak	27.4	307.882	28.5	339.506	1	1	0			welan	4.3	4.8	welan	7	13	thora	10	56	lantana	10	2
teak	12.8	39.1164	13.7	47.5637						mora	2.6	3.9							mana	55	15
teak	20.3	142.111	21.7	169.542						milla	4.9
teak	9.7	18.1871	11	25.4228						gongottu	4.8	0
teak	6	9.7773	7.8	11.6161						karawala kebilla	2.4	3.9
teak	13.6	46.5724	14.8	59.337						karawaakebia	4.8
teak	8.2	12.6043	9.4	16.8335						nelli		2.8
teak	34.3	532.605	35.6	581.965						nelli		2.6
teak	7.2	10.529	8.6	13.8033						nelli		2.9
teak	6.8	10.0677	7.8	11.6161						nelli		3.2
teak	11.3	27.4087	12.4	35.7046
teak	14.7	58.2008	15.5	67.6589
teak	18.6	112.271	19.5	127.595
teak	19	118.95	19.8	132.939
teak	9.6	17.7227	10.7	23.5554
teak	23.3	204.054	24	220.213
teak	19.7	131.145	20.5	145.871
teak	34	521.53	35.1	562.717
teak	23.7	213.209	24.8	239.472
		2533.94		2832.93

## Sheet: Sheet10
12.6m					stump		bush			3m (1.5>5)			3m (30>1.5)			3m (30<)			Inasive spp
tree	DBh (2012)	biomass 2012	dbh (2018)	biomass	2012	2018	spp	2012	2018	spp	2012	2018	spp	2012	2018	Spp	2012	2018	spp	2012	2018
kaya	8.8	14.4818	10.3	21.25	4		0			gammalu	4		welan	4	12	balunaguta	8	81	lantana	30	0
kaya	9.6	17.7227	11.4	28.097						welan	3.5	4.8
kaya	6.7	9.98528	8.3	12.8843						hulanhik	3.8
kaya	18.9	117.261	20.4	143.984						nelli		4.6
kaya	10.6	22.9593	12.4	35.7046						nelli		3.6
kaya	18.6	112.271	20.8	151.611						karanda		3
kaya	8.7	14.136	10.2	20.7066						nelli		3.1
kaya	18.6	112.271	20.4	143.984
kaya	19.2	122.368	21.3	161.441
kaya	7.9	11.8434	9.4	16.8335
kaya	9.5	17.2715	11.3	27.4087
kaya	9.2	15.9969	11.5	28.7985
kaya	8.7	14.136	10.3	21.25
kaya	8.7	14.136	10.4	21.8066
kaya	5.4	10.1127	6.9	10.1633
kaya	8.3	12.8843	10.5	22.3764
kaya	8.3	12.8843	10.2	20.7066
kaya	8.1	12.3375	10.2	20.7066
kaya	8	12.0839	9.8	18.6647
kaya	8.7	14.136	10.4	21.8066
kaya	8.6	13.8033	10.6	22.9593
		705.083		973.145
