# Supplementary material for: Impact of community-based forest restoration on stand structural attributes, aboveground biomass and carbon stock compared to state-managed forests in tropical ecosystems of Sri Lanka
Source: PeerJ journal article supplement (doi:10.7717/peerj.18176), 2024-09-26
Supplement: State_and_community_managed_forests_Raw_data.zip [file Bambara State own.xlsx]

## Sheet: Sheet1
12.6m					stump		bush			3m (1.5>5)			3m (30>1.5)			3m (30<)			Inasive spp
tree	DBh (2012)	biomass 2012	dbh (2018)	biomass 2019	2012	2018	spp	2012	2018	spp	2012	2018	spp	2012	2018	Spp	2012	2018	spp	2012	2018
Kahata	23	197.326	24.2	224.949	0		indi	2		nelli	3.2		gammalu	2	4	Bowitiya	8	12	Lantana	8	16
gammalu	19.2	122.368	19.8	132.939						karanda	2.6								mana	6	18
kata kala	17.2	90.5564	18.3	107.401						nelli	2.5								Gini grass	5	9
Nelli	12.3	34.8846	13.1	41.8136						gketakela	3.1
gammalu	33.3	496.151	33.8	514.213						ginusupu	2.9
nelli	24.4	229.737	24.9	241.938						ginisiriya	1.2
Kahata	16.3	77.96	17.1	89.1041						gammalu		1.8
damunu	17.5	94.9923	18.2	105.804						kobba		1.6
Kahata	29	354.407	29.9	382.059
nelli	12.1	33.284	12.9	40.0023
baththik	15.6	68.9004	16.8	84.8263
karanda	5.2	10.3299	6.4	9.81712
nelli			5.2	10.3299
karanda			5.6	9.94824
nelli			5	10.5998
gketakela			5.2	10.3299
ginusupu			5.4	10.1127
ginisiriya			5.5	10.0239

## Sheet: Sheet2
12.6m					stump		bush			3m (1.5>5)			3m (30>1.5)			3m (30<)			Inasive spp
tree	DBh (2012)	biomass 2012	dbh (2018)	biomass 2019	2012	2018	spp	2012	2018	spp	2012	2018	spp	2012	2018	Spp	2012	2018	spp	2012	2018
Welan	7.4	10.8387	8.3	12.8843	3		0			bolpana	1.5	4.2	bolpana	4	9	bolpana	12	21	0
Mora	25.5	257.014	26.2	275.202						migonkarapincha	1.1
Badulla	9	15.213	10.4	21.8066						bolpana	1.1	3.4
mora	14.5	55.968	15.4	66.4305						migonkarapincha	2.6
gatala	14.5	55.968	15.8	71.423						migonkarapincha		1.8
mora	15.5	67.6589	16.7	83.4267						migonkarapincha		2.5
kota dimbula	10	19.6593	12.4	35.7046						mora	2.1	4.9
badulla	39	721.584	40.2	774.497						mora	2.6
milla	40.9	806.239	50.8	1324.27
milla	27.5	310.691	28.8	348.407
mora	31.9	447.328	32.8	478.418
gatala	6.6	9.91606	7.8	11.6161
suriya mara	49	1220.48	49.8	1266.08
puwak gediya	10	19.6593	11.2	26.7336
migon karapincha	15.5	67.6589	16.8	84.8263
kudu daula	26.2	275.202	27.4	307.882
suriya mara	56.2	1661.25	57	1714.44
iththa	7.8	11.6161	9	15.213
gatala	11.9	31.7362	13.1	41.8136
nitul	10	19.6593	10.8	24.1647
kudu daula	12.9	40.0023	13.3	43.6776
nolaba	55.3	1602.42	56.4	1674.47
badulla	26.9	294.035	27.9	322.059
mora	8.9	14.8408	10.2	20.7066
mora	16.5	80.667	18.1	104.22
sawanidala	35.5	578.089	37	637.611
kudu daula	26.3	277.853	28.1	327.822
kota dimbula	19.5	127.595	20.8	151.611
Badulla	6.3	9.7874	8.4	13.1775
kudu daula	24.5	232.151	25.6	259.573
wal kurundu	7.8	11.6161	9	15.213
wal kurundu	6.5	9.86	7.8	11.6161
kahata	36.5	617.441	37.1	641.685
Badulla	6.2	9.77086	7.8	11.6161
kudu daula	8.9	14.8408	10.3	21.25
nika daula	15.8	71.423	17	87.665
mora	42.9	900.486	44	954.567
migon karapincha	12.6	37.3842	13.8	48.5681
migon karapincha	8.9	14.8408	10.7	23.5554
Mora	7.5	11.0133	9.2	15.9969
kanu	48.7	1203.6	49.6	1254.6
sawanidala	34.5	540.054	36.4	613.447
migon karapincha			5.1	10.4583
migon karapincha			5.3	10.2147
mora			5	10.5998

## Sheet: Sheet3
12.6m					stump		bush			3m (1.5>5)			3m (30>1.5)			3m (30<)			Inasive spp
tree	DBh (2012)	biomass 2012	dbh (2018)	bomass 2019	2012	2018	spp	2012	2018	spp	2012	2018	spp	2012	2018	Spp	2012	2018	spp	2012	2018
Nelli	8.6	13.8033	9.8	18.6647	4	5	0			welan	3.6		welan	6	8	thora	2	5	lantana	5	20
Nelli	5.9	9.80028	7.2	10.529						welan	3.1	4.6							mana	45	55
welan	16.5	80.667	18.3	107.401						gammalu	2.6	2.9
gammalu	5.1	10.4583	7.8	11.6161						gammalu		1.8
damaniya	46.5	1083.41	0	34.4703						welan		1.6
gammalu	35.1	562.717	36.9	633.551
daminiya	9.1	15.5984	10.4	21.8066
suriyamara	15.7	70.1551	17.2	90.5564
ketakela	6.2	9.77086	8.6	13.8033
welan			5	10.5998

## Sheet: Sheet4
12.6m					stump		bush			3m (1.5>5)			3m (30>1.5)			3m (30<)			Inasive spp
tree	DBh (2012)	biomass 2012	dbh (2018)		2012	2018	spp	2012	2018	spp	2012	2018	spp	2012	2018	Spp	2012	2018	spp	2012	2018
kahata	41.3	824.667	42	857.422	0		indi	1		0			0			bowitiya	3	3	rila thana	25	40
Nelli	21.2	159.449	21.9	173.672															podisingnomaran	45	30
																			lantana	10	20

## Sheet: Sheet5
12.6m					stump		bush			3m (1.5>5)			3m (30>1.5)			3m (30<)			Inasive spp
tree	DBh (2012)	biomass 2012	dbh (2018)	biomass 2019	2012	2018	spp	2012	2018	spp	2012	2018	spp	2012	2018	Spp	2012	2018	spp	2012	2018
mi	53	1456.92	53.9	1513.02	4	4	0			gongotu	1.1		migonkarapincha	12	23	migonkarapincha	28	49	hawarinuga	0.5	1
puwakgediya wel	13.5	45.5943	15.9	72.7041						gongotu	1.8
gongotu	8.5	13.4838	9.4	16.8335						bolpana	0.7
welan	33.5	503.336	34.4	536.323						yakinaran	1.5
welan	61	1993.03	61.8	2051.27						migonkarapincha		1.9
migonkarapincha	13	40.9014	14.2	52.7176						migonkarapincha		2.3
kudu daula	30.5	401.086	31.6	437.202						bolpana		1.6
welan	53	1456.92	53.8	1506.74
mora	48.7	1203.6	49.3	1237.48
gongotu	7	10.272	8.4	13.1775
gongotu	5.8	9.83642	7.1	10.3939
erabadu	35	558.907	36.4	613.447
gongotu	7.3	10.6773	8.6	13.8033
gongotu	6	9.7773	7.1	10.3939
migonkarapincha	9.3	16.4086	10.1	20.1764
wellangiriya	10	19.6593	11.3	27.4087
gongotu	17.6	96.4973	18.8	115.584
gongotu	7.3	10.6773	8.5	13.4838
gongotu	5.9	9.80028	7.2	10.529
gongotu	6.1	9.7675	8.4	13.1775
gongotu	8	12.0839	9.9	19.1554
mora	43.3	919.967	44	954.567
mora	36.5	617.441	37.2	645.771
hawarinuga	72	2867.82	74.3	3070.88
migonkarapincha	6.6	9.91606	8.3	12.8843
gongotu	8.3	12.8843	9.9	19.1554
gongotu	6.2	9.77086	8.4	13.1775
gongotu	10.8	24.1647	12.2	34.0777
divikaduru	8.4	13.1775	9.6	17.7227
kithul	23.3	204.054	23.8	215.531
kudu daula	35	558.907	35.9	593.672
kithul	20.6	147.772	21.4	163.447
na	13.6	46.5724	14.8	59.337
gongotu			5.6	9.94824

## Sheet: Sheet6
12.6m					stump		bush			3m (1.5>5)			3m (30>1.5)			3m (30<)			Inasive spp
tree	DBh (2012)	biomass 2012	dbh (2018)	biomass 2019	2012	2018	spp	2012	2018	spp	2012	2018	spp	2012	2018	Spp	2012	2018	spp	2012	2018
gongotu	7.4	10.8387	9.1	15.5984	0		0			gongotu	1.1	3.2	gongotu	1		3			katakalu	2	7
gongotu	6	9.7773	8.3	12.8843						gongotu	1	2.8							gall	1	5
mora	27.5	310.691	28.8	348.407						gongotu	1.1	2.9
gongotu	5.5	10.0239	7.3	10.6773						gongotu	1.1	2.9
gongotu	11.5	28.7985	13.2	42.739
thitthawel	9	15.213	9.8	18.6647
gongotu	12	32.5035	13.3	43.6776
gongotu	12	32.5035	13.5	45.5943
thitthawel	5	10.5998	5.8	9.83642
iha iguru	8.2	12.6043	9.8	18.6647
gongotu	10.8	24.1647	12.3	34.8846
gongotu	9.2	15.9969	10.4	21.8066
gongotu	8	12.0839	9.8	18.6647
gongotu	10.5	22.3764	11.8	30.982
gongotu	12	32.5035	13.4	44.6294
puwakgediya wel	7.2	10.529	9.3	16.4086
gongotu	10	19.6593	12.1	33.284
gongotu	10	19.6593	12.4	35.7046
iha iguru	8.7	14.136	9.8	18.6647
gongotu	18	102.649	19.1	120.653
gongotu	8.3	12.8843	9.8	18.6647
gongotu	17.3	92.0219	18.7	113.921
gongotu	11.2	26.7336	12.6	37.3842
gongotu	12.3	34.8846	13.7	47.5637
erabadu	56.2	1661.25	57.3	1734.6
gongotu	17	87.665	18.3	107.401
gongotu	7.5	11.0133	8.7	14.136
gongotu	6.3	9.7874	7.8	11.6161
welan	31	417.305	32.1	454.144
kithul	14.2	52.7176	15.4	66.4305
gongotu	10	19.6593	12.3	34.8846
gongotu	7.1	10.3939	9.3	16.4086
gongotu	11.5	28.7985	12.9	40.0023
gongotu	12.2	34.0777	12.1	33.284
gongotu	7.7	11.402	8.5	13.4838
gongotu	10	19.6593	10.9	24.7872
wellangiriya	11.8	30.982	12.9	40.0023
wellangiriya	19	118.95	19.9	134.747
gongotu	9.2	15.9969	11.6	29.5132
gongotu	12.2	34.0777	13.4	44.6294
gongotu	14	50.6165	15.3	65.2153
bhuu randa	80	3604.14	80.7	3672.58
iha iguru	10	19.6593	10.9	24.7872
gongotu	17.6	96.4973	18.9	117.261
gongotu	14.2	52.7176	15.6	68.9004
gongotu	8.1	12.3375	9.4	16.8335
gongotu	11.5	28.7985	12.8	39.1164
gongotu	7.2	10.529	9.1	15.5984
gongotu	7.6	11.2011	8.8	14.4818
iha iguru	7	10.272	8.1	12.3375
gongotu	8	12.0839	10.1	20.1764
gongotu	12.2	34.0777	14	50.6165
gongotu	6.6	9.91606	7.9	11.8434
gongotu	12	32.5035	13.4	44.6294
gongotu	7.5	11.0133	9.3	16.4086
gongotu	12.3	34.8846	14.2	52.7176
gongotu	12	32.5035	13.9	49.5857
gongotu	20	136.568	22.2	179.965
gongotu	18.3	107.401	19.7	131.145
gongotu	5.8	9.83642	7.1	10.3939
gongotu	10.5	22.3764	11.8	30.982
gongotu	13.4	44.6294	14.5	55.968
gongotu	7.5	11.0133	9.3	16.4086
gongotu	7	10.272	9.3	16.4086
gongotu			6.2	9.77086
gongotu			5.8	9.83642

## Sheet: Sheet7
12.6m					stump		bush			3m (1.5>5)			3m (30>1.5)			3m (30<)			Inasive spp
tree	DBh (2012)	biomass 2012	dbh (2018)	biomass 2019	2012	2018	spp	2012	2018	spp	2012	2018	spp	2012	2018	Spp	2012	2018	spp	2012	2018
nolaba	11.7	30.241	13.1	41.8136	0		0			thamiliya	4.6		dimbi biju	5	8	dimbi biju	3	12	ginigrass	2	8
nolaba	10.8	24.1647	12	32.5035						thamiliya	1.5	2.7							katakalu	4	10
nolaba	10.5	22.3764	12.2	34.0777						thamiliya	3.4	4.1							mist	1	6
nolaba	7	10.272	8.9	14.8408						kududaula	3.1	4
nolaba	10.4	21.8066	12.2	34.0777						thamiliya	3.4	3.8
puwakgediya wel	6.9	10.1633	8.2	12.6043						migonkarapincha	2.9	3.7
nolaba	17.8	99.5467	19.3	124.097						wellangiriya	2.3	0
nolaba	5.5	10.0239	7.1	10.3939						thamiliya	1.7	0
erabadu	13.5	45.5943	14.6	57.0778
kithul	30.3	394.691	30.9	414.035
kaliya	7.5	11.0133	9.1	15.5984
nolaba	9	15.213	10.9	24.7872
nolaba	6	9.7773	7.9	11.8434
gongotu	5.5	10.0239	6.8	10.0677
gongotu	6.5	9.86	8.2	12.6043
gongotu	9	15.213	10.8	24.1647
welan	6	9.7773	8	12.0839
kudu daula	27.7	316.349	29.3	363.506
nolaba	10.9	24.7872	12.5	36.5378
nolaba	11.4	28.097	12.8	39.1164
nolaba	13.2	42.739	14.6	57.0778
gongotu	7.2	10.529	9.3	16.4086
migonkarapincha	12	32.5035	13.8	48.5681
nolaba	6	9.7773	8.3	12.8843
kudu daula	28	324.934	29.8	378.934
migonkarapincha	15.5	67.6589	17.3	92.0219
gatala	30	385.197	31.8	443.939
gatala	17	87.665	18.9	117.261
gatala	20	136.568	21.6	167.497
puwakgediya wel	14	50.6165	14.8	59.337
daluk	26	269.939	27	296.778
kudu daula	27	296.778	28.4	336.565
kudu daula	33.5	503.336	34	521.53
migonkarapincha	12.5	36.5378	13.4	44.6294
puwakgediya wel	9.1	15.5984	9.8	18.6647
migonkarapincha	14.3	53.7879	15.2	64.0133
kappetiya	6	9.7773	7.3	10.6773
kappetiya	7.5	11.0133	8.1	12.3375
nolaba	13	40.9014	14.5	55.968
nolaba	10.5	22.3764	11.8	30.982
puwakgediya wel	10.3	21.25	10.8	24.1647
kappetiya	10.2	20.7066	10.8	24.1647
thambiliya	7.5	11.0133	8.6	13.8033
migonkarapincha	6	9.7773	7.3	10.6773
thambiliya	5.5	10.0239	6.8	10.0677
kududaula			5.7	9.88574
kududaula			6.1	9.7675
migonkarapincha			5.8	9.83642

## Sheet: Sheet8
12.6m					stump		bush			3m (1.5>5)			3m (30>1.5)			3m (30<)			Inasive spp
tree	DBh (2012)	biomass 2012	dbh (2018)	biomass 2019	2012	2018	spp	2012	2018	spp	2012	2018	spp	2012	2018	Spp	2012	2018	spp	2012	2018
mora	20.5	145.871	21.8	171.601	3		0			kudu daula	3.8		kududaula	1	4	nolaba	3	5	mana	5	15
ginisiria	8	12.0839	9.3	16.4086						kudu daula	4.1
ginisiria	17	87.665	18.4	109.011						welan	3.2	4.8
ginisiria	9	15.213	10.4	21.8066						welan		1.8
kotadimbula	20	136.568	22.3	182.089
ginisiria	13	40.9014	14.8	59.337
panukera	45	1005.12	45.4	1025.7
ginisiria	14	50.6165	15.7	70.1551
galkela	17	87.665	17.8	99.5467
ginisiria	13	40.9014	14.9	60.4863
gaskela	12.8	39.1164	13.6	46.5724
ginisiria	16	73.9983	17.6	96.4973
ginisiria	18.5	110.635	19.8	132.939
kudu dawula	10	19.6593	11.3	27.4087
kudu dawula	8	12.0839	9.2	15.9969
kudu dawula	6.3	9.7874	7.8	11.6161
Korakaha	5.1	10.4583	6.7	9.98528
korakaha	5	10.5998	6.7	9.98528
korakaha	7.4	10.8387	8.3	12.8843
kudu dawula	24	220.213	25.2	249.417
kudu dawula	23	197.326	24.3	227.336
gansuriya	11	25.4228	12.8	39.1164
litsea	6.3	9.7874	7.3	10.6773
Malaboda	27.5	310.691	28.3	333.638
aththikka	16	73.9983	17.3	92.0219
welan	15	61.6488	16.3	77.96
gonna	42	857.422	42.6	886.013
halbamiya	5	10.5998	5.8	9.83642
bhudeliya	6	9.7773	8.3	12.8843
kudu dawula	7	10.272	8.8	14.4818
bhudeliya	11.6	29.5132	13.4	44.6294
nika	19.5	127.595	20.6	147.772
bhudeliya	8	12.0839	10.4	21.8066
bhudeliya	8	12.0839	10.5	22.3764
mangul karanda	26.2	275.202	27.8	319.197
ginisiria	9	15.213	10.5	22.3764
nolaba	8	12.0839	9.8	18.6647
halbamiya	8	12.0839	8.7	14.136
gaduba	5	10.5998	7.6	11.2011
kudu dawula			5	10.5998
welan			5.1	10.4583

## Sheet: Sheet9
12.6m					stump		bush			3m (1.5>5)			3m (30>1.5)			3m (30<)			Inasive spp
tree	DBh (2012)	biomass 2012	dbh (2018)	biomass 2019	2012	2018	spp	2012	2018	spp	2012	2018	spp	2012	2018	Spp	2012	2018	spp	2012	2018
gongotu	6.6	9.91606	7	10.272	0	2	0			welan	2.6		yakinaran	5	9	yakinaran	10	10	lantana	20	30
badulla	10.6	22.9593	11	25.4228						kon	2.2	3.3
ankenda	8.4	13.1775	9.1	15.5984						kon	2.2	3.1
ankenda	9.7	18.1871	11.7	30.241						tharana	1.6	2.1
migon karapincha	8.1	12.3375	8.7	14.136						tharana	1.2	2
wal uguressa	10.7	23.5554	11.1	26.0716						yakinaran	1.6	2
wal uguressa	7.8	11.6161	8.9	14.8408						tharana	2.1	2.8
kon	9.2	15.9969	10.1	20.1764						yakinaran		4.1
gongotu	8.3	12.8843	9.3	16.4086						yakinaran		1.6
migon karapincha	8.7	14.136	9.2	15.9969
dau	8.1	12.3375	8.9	14.8408
wal uguressa	9.1	15.5984	9.8	18.6647
migon karapincha	7.7	11.402	8.1	12.3375
milla	9.6	17.7227	10.1	20.1764
milla	8.6	13.8033	9	15.213
migon karapincha	8.1	12.3375	8.9	14.8408
ginisiriya	12.1	33.284	12.8	39.1164
mora	11.1	26.0716	11.8	30.982
tharana	8.6	13.8033	8.1	12.3375
tharana	9.7	18.1871	10.2	20.7066
tharana	5.6	9.94824	6.3	9.7874
mora	11.2	26.7336	11.9	31.7362
savanidala	10.1	20.1764	11	25.4228
kobomella	10.1	20.1764	10.8	24.1647
keena	10.2	20.7066	10.9	24.7872
welan			5	10.5998

## Sheet: Sheet10
12.6m					stump		bush			3m (1.5>5)			3m (30>1.5)			3m (30<)			Inasive spp
tree	DBh (2012)	biomass 2012	dbh (2018)	biomass 2019	2012	2018	spp	2012	2018	spp	2012	2018	spp	2012	2018	Spp	2012	2018	spp	2012	2018
gansuriya	11.3	27.4087	11.9	31.7362	4	4	0			kudu daula	2.4	3.1	kududaula	4	6	monarakudumbiya	78	62	podisinghomaran	3	10
milla	6.3	9.7874	7.3	10.6773						burulla	1.5	2.1							katakalu	1	8
ankenda	14.7	58.2008	15.2	64.0133						bombu	1.8	2.3
nuga	54.6	1557.4	54.9	1576.61						kudu daula	4.6
aththikka	36.1	601.542	36.7	625.469						milla	3.3	3.9
bhukenda	18.7	113.921	19.9	134.747						bolpana		1.8
kenda	5.6	9.94824	6.4	9.81712						bala		2.1
gaduba	11.3	27.4087	11.7	30.241
mora	6	9.7773	6.8	10.0677
milla	8.9	14.8408	9.2	15.9969
milla	5.8	9.83642	6.3	9.7874
gongotu	7.7	11.402	8.2	12.6043
gongotu	5.9	9.80028	6.8	10.0677
badulla	13.4	44.6294	13.8	48.5681
kududaula	11	25.4228	11.7	30.241
walugurassa	6.2	9.77086	6.6	9.91606
gokatu	5.7	9.88574	6.2	9.77086
bala	5.3	10.2147	5.8	9.83642
puwakgediya wel	5.4	10.1127	5.8	9.83642
kududaula	7.4	10.8387	7.8	11.6161
kududaula			5.1	10.4583
