# Supplementary material for: Impact of community-based forest restoration on stand structural attributes, aboveground biomass and carbon stock compared to state-managed forests in tropical ecosystems of Sri Lanka
Source: PeerJ journal article supplement (doi:10.7717/peerj.18176), 2024-09-26
Supplement: State_and_community_managed_forests_Raw_data.zip [file Bambarabedda community(1).xlsx]

## Sheet: Sheet1
12.6m					stump		bush			3m (1.5>5)			3m (30>1.5)			3m (30<)			Inasive spp
tree	DBh (2012)	bimass 2012	dbh (2018)		2012	2018	spp	2012	2018	spp	2012	2018	spp	2012	2018	Spp	2012	2018	spp	2012	2018
nelli	21.4	163.447	22	175.756	3	0	indi	2		nelli		3.8	podisinghomaran	3	12	Balunaguta	25	46	lantana	0.08	0
kahata	6	9.7773	6.5	9.86						nelli		4.1							naththa suriya	0.07	7
kahata	6.5	9.86	7	10.272						nelli		2.8							mana	0.3	10
kahata	31	417.305	31.6	437.202						nelli		3.8							gini grass	0.12	0
dhamba	6.4	9.81712	7	10.272						nelli		3.2							podisinghomaran	0.03	0
damunu	8.5	13.4838	9.1	15.5984						ginisapu		4.8
dhamba	6.5	9.86	7.1	10.3939
dhamba	12.8	39.1164	13.4	44.6294
damunu	16.4	79.3069	17	87.665
bulu	50.1	1283.4	50.4	1300.84
kahata	30	385.197	30.6	404.304
nelli		2420.57	5.2	10.3299
damunu			5.3	10.2147
nelli			5.2	10.3299
ginisapu			5.3	10.2147
				2547.88

## Sheet: Sheet2
12.6m					stump		bush			3m (1.5>5)			3m (30>1.5)			3m (30<)			Inasive spp
tree	DBh (2012)	bimass 2012	dbh (2018)	bimass 2019	2012	2018	spp	2012	2018	spp	2012	2018	spp	2012	2018	Spp	2012	2018	spp	2012	2018
Welan	21.7	169.542	22.2	179.965	0		0			nelli		3.6	gammalu	2	14	gini grass	1	85	naththa S	12	10
gammalu	19.7	131.145	20.2	140.25						nelli		3.2							lanthana	7	2
kahata	31.6	437.202	32.1	454.144						nelli		1.9							Gini grass	65	0
welan		737.888	5.3	10.2147						nelli		2.6
				784.574						nelli		3.6
										nelli		3.1
										welan	4.2
										welan	3.6	4.8

## Sheet: Sheet3
12.6m					stump		bush			3m (1.5>5)			3m (30>1.5)			3m (30<)			Inasive spp
tree	DBh (2012)	biaomaa 2012	dbh (2018)		2012	2018	spp	2012	2018	spp	2012	2018	spp	2012	2018	Spp	2012	2018	spp	2012	2018
Nelli	37.1	641.685	38.6	704.368	0		0			nelli		2.1		0	23	hulan thala	2	78	gini grass	0.7	0
dhamba	49.5	1248.88	50.1	1283.4						nelli		3.2							naththa suriya	0.2	20
damba		1890.57	5	10.5998						nelli		2.7							rila thana	3	0
				1998.37						nelli		3.5							balu naguta	3	2
										ginisapu		4.1							lantana	2	0
										nelli		3.4
										damba	4.6

## Sheet: Sheet4
12.6m					stump		bush			3m (1.5>5)			3m (30>1.5)			3m (30<)			Inasive spp
tree	DBh (2012)	biomass 2012	dbh (2018)	biomass 2019	2012	2018	spp	2012	2018	spp	2012	2018	spp	2012	2018	Spp	2012	2018	spp	2012	2018
gammalu	33.3	496.151	33.8	514.213	5	5				gammalu	2.5		bowitiya	8	12	thora	6	98	lantana	6	0
nelli	24.2	224.949	24.8	239.472						karanda		1.9							mana	35	10
Kahata	16.3	77.96	16.7	83.4267						nelli	4.6								gini grass	20	0
damunu	17.5	94.9923	18.2	105.804						nelli		3.8							naththasuriya	10	5
Kahata	29	354.407	29.6	372.723						nelli		2.9
gammalu		1248.46	5.1	10.4583						nelli		3.6
nelli			5.6	9.94824						nelli		2.6
				1336.04						nelli		4.1
										nelli		3.9
										karanda		3.1
										nelli		4.7

## Sheet: Sheet5
12.6m					stump		bush			3m (1.5>5)			3m (30>1.5)			3m (30<)			Inasive spp
tree	DBh (2012)	biomass 2012	dbh (2018)	biomass 2019	2012	2018	spp	2012	2018	spp	2012	2018	spp	2012	2018	Spp	2012	2018	spp	2012	2018
Kahata	23	197.326	23.8	215.531	0		indi	2		nelli	3.7		pera	6	18	Bowitiya	8	102	Lantana	50	0
gammalu	19.2	122.368	19.9	134.747						ginisiriya	3.2								Mana	20	5
kata kala	17.2	90.5564	17.8	99.5467						karanda		2.6							Gini grass	10	0
Nelli	12	32.5035	12.6	37.3842						nelli		2.1
nelli		442.755	5.2	10.3299						nelli		1.8
ginisiriya			5.8	9.83642						nelli		2.3
				507.375						nelli		3.6
										ginisiriya		4.1
										batu		1.8

## Sheet: Sheet6
12.6m					stump		bush			3m (1.5>5)			3m (30>1.5)			3m (30<)			Inasive spp
tree	DBh (2012)	biomass 2012	dbh (2018)		2012	2018	spp	2012	2018	spp	2012	2018	spp	2012	2018	Spp	2012	2018	spp	2012	2018
kahata	41.1	815.426	41.6	838.626	0		indi	1		nelli	4.2		0	21	41	podisingnomaran	10	62	ginigrass	14	5
Nelli	21.2	159.449	21.8	171.601						nelli		3.3							rila thana	56	5
nelli		974.875	5.6	9.94824						nelli		1.9							lantana	12	2
hulanhik			6.1	9.7675						nelli		2.4							podisinm	3	0
hulanhik			5.3	10.2147						nelli		4.6							illuk	7	0
				1040.16						karanda		2.6
										thibbatu		1.8
										hulanhik	4.2
										hulanhik	3.8

## Sheet: Sheet7
12.6m					stump		bush			3m (1.5>5)			3m (30>1.5)			3m (30<)			Inasive spp
tree	DBh (2012)	biomass 2012	dbh (2018)	biomass 2019	2012	2018	spp	2012	2018	spp	2012	2018	spp	2012	2018	Spp	2012	2018	spp	2012	2018
welan	6.3	9.7874	7.8	11.6161	4	4	0			karada		4.1	gammalu	3	27	thora	14	109	naththasuriya	40	10
kahata	45.8	1046.5	46.2	1067.51						karada		3.4							mana	25	0
gammalu	11.8	30.982	12.5	36.5378						nelli		2.8
ginisiriya	5.3	10.2147	6.7	9.98528						karanda		3.3
ginisiriya	5.2	10.3299	7	10.272						nelli		3
gammalu	40.6	792.556	41	810.826						nelli		3.2
ginisiriya		1900.37	7.2	10.529						ginisiriya	4.9
hulanhik			5	10.5998						gaduba	4.6
gaduba			6.2	9.77086						gaduba	3.8
gaduba			5.2	10.3299						hulanhik	4.1
				1987.98

## Sheet: Sheet8
12.6m					stump		bush			3m (1.5>5)			3m (30>1.5)			3m (30<)			Inasive spp
tree	DBh (2012)	biomass 2012	dbh (2018)	biomass 2019	2012	2018	spp	2012	2018	spp	2012	2018	spp	2012	2018	Spp	2012	2018	spp	2012	2018
gammalu	36.8	629.503	37.4	653.984	6	6	0	0	0	welan	2.5	2.9	gammalu	3	18	hulanthala	16	64	lantana	30	10
welan	32.9	481.938	33.2	492.578						welan	1.7	2.2							mana	40	30
bulu	17	87.665	17.5	94.9923						nelli	2.4	2.9
kuratiya		1199.11	5	10.5998						nelli	1.5	1.8
nelli			5.1	10.4583						nelli		2.6
				1262.61						nelli		4.6
										kuratiya	4.6
										nelli	4.8

## Sheet: Sheet9
12.6m					stump		bush			3m (1.5>5)			3m (30>1.5)			3m (30<)			Inasive spp
tree	DBh (2012)	biomass 2012	dbh (2018)	biomass 2019	2012	2018	spp	2012	2018	spp	2012	2018	spp	2012	2018	Spp	2012	2018	spp	2012	2018
gansuriya	16.9	86.2391	18	102.649	1	1	0			welan	4.3	4.8	welan	7	13	thora	10	56	lantana	10	2
bulu	41.2	820.04	41.8	847.998						mora	2.6	3.9							mana	55	15
mora	11.5	28.7985	12.7	38.2437						milla	4.9
welan	9	15.213	10.9	24.7872						gongottu	4.8	0
uwakgediyawel	5.5	10.0239	0							karawala kebilla	2.4	3.9
ginisiriya	6	9.7773	0							karawaakebia	4.8
mora	5.8	9.83642	6.8	10.0677						nelli		2.8
damba	7	10.272	8.4	13.1775						nelli		2.6
ginisiriya	14	50.6165	15.1	62.8245						nelli		2.9
kududaula		1040.82	6.4	9.81712						nelli		3.2
gongotu			6.5	9.86
milla			5.6	9.94824
				1129.37

## Sheet: Sheet10
12.6m					stump		bush			3m (1.5>5)			3m (30>1.5)			3m (30<)			Inasive spp
tree	DBh (2012)	biomass2012	dbh (2018)	biomass2018	2012	2018	spp	2012	2018	spp	2012	2018	spp	2012	2018	Spp	2012	2018	spp	2012	2018
nelli	20.2	140.25	20.8	151.611	4		0			gammalu	4		welan	4	12	balunaguta	8	81	lantana	30	0
nelli	18.5	110.635	19.1	120.653						welan	3.5	4.8
welan	24.3	227.336	25.1	246.911						hulanhik	3.8
bulu	18.6	112.271	19.2	122.368						nelli		4.6
nelli	34.7	547.556	35	558.907						nelli		3.6
gammalu	7.1	10.3939	8.3	12.8843						karanda		3
Panukera	6	9.7773	7.4	10.8387						nelli		3.1
kududaula	24	220.213	25.4	254.468
athdemata	25.5	257.014	26.8	291.305
ginisiriya	15	61.6488	16.8	84.8263
gammalu		1697.1	5.1	10.4583
hulanhik			5	10.5998
				1875.83
