# Supplementary material for: Impact of community-based forest restoration on stand structural attributes, aboveground biomass and carbon stock compared to state-managed forests in tropical ecosystems of Sri Lanka
Source: PeerJ journal article supplement (doi:10.7717/peerj.18176), 2024-09-26
Supplement: State_and_community_managed_forests_Raw_data.zip [file dunukewala community(1).xlsx]

## Sheet: Sheet1
12.6m					stump		bush			3m (1.5>5)			3m (30>1.5)			3m (30<)			Inasive spp
tree	DBh (2012)	biomass 2012	dbh (2018)		2012	2018	spp	2012	2018	spp	2012	2018	spp	2012	2018	Spp	2012	2018	spp	2012	2018
welan	31.3	427.194	32.4	464.468	3	0	indi	2		nelli		3.8	podisinghomaran	3	12	Balunaguta	25	46	lantana	0.08	0
nelli	11.4	28.097	11.9	31.7362						nelli		4.1							naththa suriya	0.07	7
kahata	27.8	319.197	31.3	427.194						nelli		2.8							mana	0.3	10
										nelli		3.8							gini grass	0.12	0
										nelli		3.2							podisinghomaran	0.03	0
										ginisapu		4.8

## Sheet: Sheet2
12.6m					stump		bush			3m (1.5>5)			3m (30>1.5)			3m (30<)			Inasive spp
tree	DBh (2012)	biomass 2012	dbh (2018)		2012	2018	spp	2012	2018	spp	2012	2018	spp	2012	2018	Spp	2012	2018	spp	2012	2018
Welan	41.2	820.04	41.7	843.305	0		0			nelli		3.6	gammalu	2	14	gini grass	1	85	naththa S	12	10
welan	19.4	125.839	20	136.568						nelli		3.2							lanthana	7	2
										nelli		1.9							Gini grass	65	0
										nelli		2.6
										nelli		3.6
										nelli		3.1
										welan	4.2
										welan	3.6	4.8

## Sheet: Sheet3
12.6m					stump		bush			3m (1.5>5)			3m (30>1.5)			3m (30<)			Inasive spp
tree	DBh (2012)	biomass 2012	dbh (2018)	biomass 2019	2012	2018	spp	2012	2018	spp	2012	2018	spp	2012	2018	Spp	2012	2018	spp	2012	2018
welan	32.1	454.144	33	485.471	0		0			nelli		2.1		0	23	hulan thala	2	78	gini grass	0.7	0
dhamba	19.4	125.839	21	155.504						nelli		3.2							naththa suriya	0.2	20
welan	15.8	71.423	17.3	92.0219						nelli		2.7							rila thana		0
ketakela	9.6	17.7227	11.7	30.241						nelli		3.5							balu naguta	3	2
damunu	17.9	101.091	19.1	120.653						ginisapu		4.1							lantana	2	0
damunu	37.3	649.871	39.2	730.271						nelli		3.4
welan	33	485.471	34.4	536.323						damba	4.6
ketakela	29.4	366.565	30.8	410.778

## Sheet: Sheet4
12.6m					stump		bush			3m (1.5>5)			3m (30>1.5)			3m (30<)			Inasive spp
tree	DBh (2012)	biomass 2012	dbh (2018)	biomass 2019	2012	2018	spp	2012	2018	spp	2012	2018	spp	2012	2018	Spp	2012	2018	spp	2012	2018
nelli	18.3	107.401	20	136.568	5	5				gammalu	2.5		bowitiya	8	12	thora	6	98	lantana	6	0
welan	41.2	820.04	41.9	852.704						karanda		1.9							mana	35	10
welan	29.2	360.46	30.1	388.349						nelli	4.6								gini grass	20	0
welan	31	417.305	31.8	443.939						nelli		3.8							naththasuriya	10	5
damunu	28.6	342.46	29.4	366.565						nelli		2.9
										nelli		3.6
										nelli		2.6
										nelli		4.1
										nelli		3.9
										karanda		3.1
										nelli		4.7

## Sheet: Sheet5
12.6m					stump		bush			3m (1.5>5)			3m (30>1.5)			3m (30<)			Inasive spp
tree	DBh (2012)	biomass 2012	dbh (2018)	biomass 2019	2012	2018	spp	2012	2018	spp	2012	2018	spp	2012	2018	Spp	2012	2018	spp	2012	2018
kata kala	36.1	601.542	37	637.611	0		indi	2		nelli	3.7		pera	6	18	Bowitiya	8	102	Lantana	50	0
Nelli	15.3	65.2153	16.1	75.3057						ginisiriya	3.2								Mana	20	5
welan	14	50.6165	15.8	71.423						karanda		2.6							Gini grass	10	0
kata kala	42	857.422	42.7	890.824						nelli		2.1
kahata	36.3	609.465	37.9	674.747						nelli		1.8
ginisiriya	19.8	132.939	21	155.504						nelli		2.3
										nelli		3.6
										ginisiriya		4.1
										batu		1.8

## Sheet: Sheet6
12.6m					stump		bush			3m (1.5>5)			3m (30>1.5)			3m (30<)			Inasive spp
tree	DBh (2012)	biomass 2012	dbh (2018)	bimass 2018	2012	2018	spp	2012	2018	spp	2012	2018	spp	2012	2018	Spp	2012	2018	spp	2012	2018
kahata	38.2	687.363	39.6	747.803	0		indi	1		nelli	4.2		0	21	41	podisingnomaran	10	62	ginigrass	14	5
welan	26	269.939	27.4	307.882						nelli		3.3							rila thana	56	5
baththi	41.6	838.626	42	857.422						nelli		1.9							lantana	12	2
baththi	18.4	109.011	18.8	115.584						nelli		2.4							podisinm	3	0
welan	12	32.5035	13.2	42.739						nelli		4.6							illuk	7	0
welan	9.8	18.6647	11.2	26.7336						karanda		2.6
welan	37.6	662.25	38.4	695.839						thibbatu		1.8
welan	24.3	227.336	25.9	267.328						hulanhik	4.2
keppetiya	5.6	9.94824	7.2	10.529						hulanhik	3.8
keppetiya	5.2	10.3299	7.5	11.0133
keppetiya	6.3	9.7874	8.1	12.3375

## Sheet: Sheet7
12.6m					stump		bush			3m (1.5>5)			3m (30>1.5)			3m (30<)			Inasive spp
tree	DBh (2012)	biomass 2012	dbh (2018)	biomass 2018	2012	2018	spp	2012	2018	spp	2012	2018	spp	2012	2018	Spp	2012	2018	spp	2012	2018
hulanhik	40.2	774.497	40.9	806.239	4	4	0			karada		4.1	gammalu	3	27	thora	14	109	naththasuriya	40	10
gaduba	18.4	109.011	20	136.568						karada		3.4							mana	25	0
gaduba	17.4	93.5005	19.1	120.653						nelli		2.8
ginisiriya	17.2	90.5564	18.7	113.921						karanda		3.3
welan	36.2	605.497	36.7	625.469						nelli		3
welan	14	50.6165	14.8	59.337						nelli		3.2
										ginisiriya	4.9
										gaduba	4.6
										gaduba	3.8
										hulanhik	4.1

## Sheet: Sheet8
12.6m					stump		bush			3m (1.5>5)			3m (30>1.5)			3m (30<)			Inasive spp
tree	DBh (2012)	biomass 2012	dbh (2018)		2012	2018	spp	2012	2018	spp	2012	2018	spp	2012	2018	Spp	2012	2018	spp	2012	2018
bulu	18.4	109.011	19.8	132.939	6	6	0	0	0	welan	2.5	2.9	gammalu	3	18	hulanthala	16	64	lantana	30	10
bulu	41.8	847.998	42.3	871.658						welan	1.7	2.2							mana	40	30
welan	24.7	237.018	25.8	264.73						nelli	2.4	2.9
kuratiya	5.6	9.94824	7.3	10.6773						nelli	1.5	1.8
keppetiya	6.3	9.7874	7.1	10.3939						nelli		2.6
keppetiya	5.9	9.80028	7.3	10.6773						nelli		4.6
welan	29.1	357.427	30.4	397.882						kuratiya	4.6
karanda	18.5	110.635	19.2	122.368						nelli	4.8
karanda	18.9	117.261	19.7	131.145
bomi	15.2	64.0133	16.1	75.3057
kuratiya	6.2	9.77086	7.7	11.402
kuratiya	5.8	9.83642	6.7	9.98528
bomi	11	25.4228	12.4	35.7046
keppetiya	6.3	9.7874	7.1	10.3939
karapincha	13.3	43.6776	13.9	49.5857
karapincha	15.5	67.6589	16.2	76.6263

## Sheet: Sheet9
12.6m					stump		bush			3m (1.5>5)			3m (30>1.5)			3m (30<)			Inasive spp
tree	DBh (2012)	biomass2012	dbh (2018)	bimass 2018	2012	2018	spp	2012	2018	spp	2012	2018	spp	2012	2018	Spp	2012	2018	spp	2012	2018
keena	37.3	649.871	37.9	674.747	1	1	0			welan	4.3	4.8	welan	7	13	thora	10	56	lantana	10	2
gokatu	19.4	125.839	20.1	138.403						mora	2.6	3.9							mana	55	15
gokatu	21	155.504	21.8	171.601						milla	4.9
damunu	38.7	708.652	39.4	739.011						gongottu	4.8	0
damunu	38.3	691.594	39.1	725.921						karawala kebilla	2.4	3.9
keppetiya	6.3	9.7874	6.9	10.1633						karawaakebia	4.8
eraminiya	5.2	10.3299	5.6	9.94824						nelli		2.8
keppetiya	5.7	9.88574	6.4	9.81712						nelli		2.6
damunu	14.2	52.7176	15.1	62.8245						nelli		2.9
										nelli		3.2

## Sheet: Sheet10
12.6m					stump		bush			3m (1.5>5)			3m (30>1.5)			3m (30<)			Inasive spp
tree	DBh (2012)	Biomass 2012	dbh (2018)	biomass 2019	2012	2018	spp	2012	2018	spp	2012	2018	spp	2012	2018	Spp	2012	2018	spp	2012	2018
welan	37.2	645.771	37.9	674.747	4		0			gammalu	4		welan	4	12	balunaguta	8	81	lantana	30	0
										welan	3.5	4.8
										hulanhik	3.8
										nelli		4.6
										nelli		3.6
										karanda		3
										nelli		3.1
