# Supplementary material for: Impact of community-based forest restoration on stand structural attributes, aboveground biomass and carbon stock compared to state-managed forests in tropical ecosystems of Sri Lanka
Source: PeerJ journal article supplement (doi:10.7717/peerj.18176), 2024-09-26
Supplement: State_and_community_managed_forests_Raw_data.zip [file dunukewala state.xlsx]

## Sheet: Sheet1
12.6m					stump		bush			3m (1.5>5)			3m (30>1.5)			3m (30<)			Inasive spp
tree	DBh (2012)	biomass 2012	dbh (2018)	biomass 2019	2012	2018	spp	2012	2018	spp	2012	2018	spp	2012	2018	Spp	2012	2018	spp	2012	2018
suriyamar	8	12.0839	9.1	15.5984	3	0	indi	2		nelli		3.8	podisinghomaran	3	12	Balunaguta	25	46	lantana	0.08	0
lihiniya	5	10.5998	6.3	9.7874						nelli		4.1							naththa suriya	0.07	7
lihiniya	5.5	10.0239	6.9	10.1633						nelli		2.8							mana	0.3	10
welan	6	9.7773	7.2	10.529						nelli		3.8							gini grass	0.12	0
suriyamara	9.5	17.2715	10.3	21.25						nelli		3.2							podisinghomaran	0.03	0
welan	5.5	10.0239	6.7	9.98528						ginisapu		4.8
suriyamara	9.5	17.2715	10.3	21.25
welan	5.5	10.0239	7.1	10.3939
suriyamara	5.5	10.0239	7	10.272
welan	7.3	10.6773	8.7	14.136
suriyamara	35	558.907	35.6	581.965
suriyamara	26	269.939	26.8	291.305
suriyamara	23.2	201.798	24	220.213
kahabambarawel	8.2	12.6043	9.3	16.4086
suriyamara	19	118.95	20.9	153.551
damunu	12.4	35.7046	13.2	42.739
damunu	16	73.9983	17.6	96.4973
welan	48	1164.66	49.4	1243.18
suriyamara	32	450.729	32.8	478.418
lihiniya	5	10.5998	6.4	9.81712
damunu	7.5	11.0133	8.7	14.136
damunu	13	40.9014	14.2	52.7176
damunu		3067.59	6.3	9.7874
damunu			5.2	10.3299
				3354.43

## Sheet: Sheet2
12.6m					stump		bush			3m (1.5>5)			3m (30>1.5)			3m (30<)			Inasive spp
tree	DBh (2012)	biomass 2012	dbh (2018)	biomass2019	2012	2018	spp	2012	2018	spp	2012	2018	spp	2012	2018	Spp	2012	2018	spp	2012	2018
welan	5.8	9.83642	6.7	9.98528	0		0			nelli		3.6	gammalu	2	14	gini grass	1	85	naththa S	12	10
damunu	15.2	64.0133	16.3	77.96						nelli		3.2							lanthana	7	2
welan	8.3	12.8843	10	19.6593						nelli		1.9							Gini grass	65	0
welan	6.3	9.7874	8.1	12.3375						nelli		2.6
liniya	7.2	10.529	8.3	12.8843						nelli		3.6
liniya	5.8	9.83642	6.7	9.98528						nelli		3.1
damunu	7.1	10.3939	9	15.213						welan	4.2
damunu	22.3	182.089	23.9	217.866						welan	3.6	4.8
damunu	16.5	80.667	17.8	99.5467
damba	5.4	10.1127	7.2	10.529
welan	8.4	13.1775	10.1	20.1764
kothalanga	5.7	9.88574	6.6	9.91606
eraminiya	5.7	9.88574	6.3	9.7874
liniya	6.3	9.7874	8	12.0839
nolaba	8.5	13.4838	9.8	18.6647
kududaula	9.8	18.6647	10.3	21.25
dunumadala	10.5	22.3764	11.8	30.982
radaliya wal	6.4	9.81712	8.1	12.3375
katakela	12.5	36.5378	14.2	52.7176
katakela	13.1	41.8136	14.9	60.4863
katakela	6.4	9.81712	8.3	12.8843
radaliya wal	5.3	10.2147	7.7	11.402
dunumadala	9.2	15.9969	10.8	24.1647
bokala wel	6.4	9.81712	7.2	10.529
kahabambara wel	6.7	9.98528	7.1	10.3939
dunumadala	27.3	305.086	28.7	345.427
welan	32	450.729	34.3	532.605
welan	8.4	13.1775	10.5	22.3764
liniya	6	9.7773	7.5	11.0133
milla	28.3	333.638	30	385.197
damunu	5.7	9.88574	7.3	10.6773
eraminiya	5.2	10.3299	5.9	9.80028
damunu	6.7	9.98528	8.1	12.3375
welan	8.6	13.8033	10.1	20.1764
welan	41.7	843.305	42.2	866.9
kahabambara wel	6.1	9.7675	7.5	11.0133
karakola	5.8	9.83642	6.4	9.81712
karakola	5.2	10.3299	6	9.7773
milla	6.4	9.81712	7.9	11.8434
milla	5.4	10.1127	8	12.0839
liniya		2690.99	5.3	10.2147
milla			5.1	10.4583
				3095.46

## Sheet: Sheet3
12.6m					stump		bush			3m (1.5>5)			3m (30>1.5)			3m (30<)			Inasive spp
tree	DBh (2012)	biomass 2012	dbh (2018)	biomass 2019	2012	2018	spp	2012	2018	spp	2012	2018	spp	2012	2018	Spp	2012	2018	spp	2012	2018
katakela	31.5	433.853	32	450.729	0		0			nelli		2.1		0	23	hulan thala	2	78	gini grass	0.7	0
katakela	36	597.6	36.8	629.503						nelli		3.2							naththa suriya	0.2	20
kanda	14.1	51.6605	15.8	71.423						nelli		2.7							rila thana		0
		1083.11		1151.66						nelli		3.5							balu naguta	3	2
										ginisapu		4.1							lantana	2	0
										nelli		3.4
										damba	4.6

## Sheet: Sheet4
12.6m					stump		bush			3m (1.5>5)			3m (30>1.5)			3m (30<)			Inasive spp
tree	DBh (2012)	biomass 2012	dbh (2018)	biomass 2019	2012	2018	spp	2012	2018	spp	2012	2018	spp	2012	2018	Spp	2012	2018	spp	2012	2018
damba	25.8	264.73	27.2	302.304	5	5				gammalu	2.5		bowitiya	8	12	thora	6	98	lantana	6	0
kanda	21.2	159.449								karanda		1.9							mana	35	10
welan	23	197.326	24.8	239.472						nelli	4.6								gini grass	20	0
eraminiya	5	10.5998								nelli		3.8							naththasuriya	10	5
katakela	40.1	770.015	41.8	847.998						nelli		2.9
katakela	19.6	129.363	21.9	173.672						nelli		3.6
nolaba	6.4	9.81712	8.2	12.6043						nelli		2.6
nolaba	7	10.272	0							nelli		4.1
nithul	8.6	13.8033	0							nelli		3.9
nolaba	5.6	9.94824	7.1	10.3939						karanda		3.1
katakela	32.1	454.144	33.6	506.949						nelli		4.7
mora	11.3	27.4087	12.1	33.284
mora	10	19.6593	11.6	29.5132
katakela	6.1	9.7675
dunumadala	34.2	528.9	36	597.6
dunumadala	21.3	161.441	23	197.326
mora		2776.64	5.4	10.1127
				2961.23

## Sheet: Sheet5
12.6m					stump		bush			3m (1.5>5)			3m (30>1.5)			3m (30<)			Inasive spp
tree	DBh (2012)	biomass 2012	dbh (2018)	biomass 2019	2012	2018	spp	2012	2018	spp	2012	2018	spp	2012	2018	Spp	2012	2018	spp	2012	2018
suriyamara	33.8	514.213	34.6	543.798	0		indi	2		nelli	3.7		pera	6	18	Bowitiya	8	102	Lantana	50	0
suriyamara	37.2	645.771	38.4	695.839						ginisiriya	3.2								Mana	20	5
nolaba	10.3	21.25	11.7	30.241						karanda		2.6							Gini grass	10	0
katakela	34	521.53	35.2	566.54						nelli		2.1
welan	40.2	774.497	41.8	847.998						nelli		1.8
welan	14.3	53.7879	15.6	68.9004						nelli		2.3
katakela	28	324.934	29.3	363.506						nelli		3.6
milla	51.3	1353.86	52.8	1444.6						ginisiriya		4.1
milla	28	324.934	29.2	360.46						batu		1.8
milla		4534.78	5.6	9.94824
milla			6	9.7773
				4941.61

## Sheet: Sheet6
12.6m					stump		bush			3m (1.5>5)			3m (30>1.5)			3m (30<)			Inasive spp
tree	DBh (2012)	biomass 2012	dbh (2018)	biomass 2019	2012	2018	spp	2012	2018	spp	2012	2018	spp	2012	2018	Spp	2012	2018	spp	2012	2018
kahata	38.2	687.363	39.6	747.803	0		indi	1		nelli	4.2		0	21	41	podisingnomaran	10	62	ginigrass	14	5
welan	26	269.939	27.4	307.882						nelli		3.3							rila thana	56	5
baththi	41.6	838.626	42	857.422						nelli		1.9							lantana	12	2
baththi	18.4	109.011	18.8	115.584						nelli		2.4							podisinm	3	0
welan	12	32.5035	13.2	42.739						nelli		4.6							illuk	7	0
welan	9.8	18.6647	11.2	26.7336						karanda		2.6
welan	37.6	662.25	38.4	695.839						thibbatu		1.8
welan	24.3	227.336	25.9	267.328						hulanhik	4.2
keppetiya	5.6	9.94824	7.2	10.529						hulanhik	3.8
keppetiya	5.2	10.3299	7.5	11.0133
keppetiya	6.3	9.7874	8.1	12.3375
keppetiya		2875.76	5.5	10.0239
keppetiya			5.7	9.88574
				3115.12

## Sheet: Sheet7
12.6m					stump		bush			3m (1.5>5)			3m (30>1.5)			3m (30<)			Inasive spp
tree	DBh (2012)	biomass 2012	DBH 2018	biomass 2019	2012	2018	spp	2012	2018	spp	2012	2018	spp	2012	2018	Spp	2012	2018	spp	2012	2018
keppetiya	5.6	9.94824	6.9	10.1633	4	4	0			karada		4.1	gammalu	3	27	thora	14	109	naththasuriya	40	10
keppetiya	6.3	9.7874	7.8	11.6161						karada		3.4							mana	25	0
welan	11.2	26.7336	12.9	40.0023						nelli		2.8
welan	12.3	34.8846	14	50.6165						karanda		3.3
burutha	14	50.6165	15.2	64.0133						nelli		3
damaba	10.5	22.3764	12.2	34.0777						nelli		3.2
damba	31	417.305	32.9	481.938						ginisiriya	4.9
aththkka	21.3	161.441	22.9	195.11						gaduba	4.6
welan	49.8	1266.08	50.2	1289.2						gaduba	3.8
seru	6.3	9.7874	8.1	12.3375						hulanhik	4.1
seru	5.8	9.83642	7.2	10.529
mee	16.8	84.8263	18	102.649
damunu	28.7	345.427	30.1	388.349
damunu	24.1	222.575	25.9	267.328
dunumadala	18.6	112.271	20.3	142.111
dunumadala	11.5	28.7985	13	40.9014
kon	32.1	454.144	33.7	510.574
kon	13.3	43.6776	14.8	59.337
kon	26.8	291.305	28.1	327.822
kon	36.9	633.551	38	678.939
thelabu	13.4	44.6294	14.8	59.337
nolaba	7.5	11.0133	8.8	14.4818
nolaba	7.8	11.6161	9.1	15.5984
dunumadala	42.8	895.648	43.7	939.66
eraminiya	5.2	10.3299	5.8	9.83642
kammala	11.6	29.5132	12.9	40.0023
kammala	10	19.6593	11.2	26.7336
nolaba	6.3	9.7874	7.8	11.6161
dunumadala	34	521.53	35.4	574.226
dunumadala	14.3	53.7879	15.8	71.423
seru	5.8	9.83642	6.7	9.98528
seru	5.7	9.88574	7	10.272
		5862.61		6500.79

## Sheet: Sheet8
12.6m					stump		bush			3m (1.5>5)			3m (30>1.5)			3m (30<)			Inasive spp
tree	DBh (2012)	biomass 2012	dbh (2018)	biomass 2019	2012	2018	spp	2012	2018	spp	2012	2018	spp	2012	2018	Spp	2012	2018	spp	2012	2018
gokatu	15.3	65.2153	16.2	76.6263	6	6	0	0	0	welan	2.5	2.9	gammalu	3	18	hulanthala	16	64	lantana	30	10
damunu	56.2	1661.25	57	1714.44						welan	1.7	2.2							mana	40	30
damunu	55.6	1621.91	56.2	1661.25						nelli	2.4	2.9
kuratiya	5.6	9.94824	7.8	11.6161						nelli	1.5	1.8
damunu	46.3	1072.8	47.1	1115.55						nelli		2.6
keppetiya	5.9	9.80028	7.3	10.6773						nelli		4.6
welan	29.1	357.427								kuratiya	4.6
karapincha	17.3	92.0219	18.4	109.011						nelli	4.8
karapincha	18	102.649	19.7	131.145
		4993.02		4830.32

## Sheet: Sheet9
12.6m					stump		bush			3m (1.5>5)			3m (30>1.5)			3m (30<)			Inasive spp
tree	DBh (2012)	biomass 2012	dbh (2018)	Biomass 2019	2012	2018	spp	2012	2018	spp	2012	2018	spp	2012	2018	Spp	2012	2018	spp	2012	2018
welan	37.8	670.568	38.2	687.363	1	1	0			welan	4.3	4.8	welan	7	13	thora	10	56	lantana	10	2
eraminiya	5.9	9.80028	7.2	10.529						mora	2.6	3.9							mana	55	15
nolaba	7.1	10.3939	8.7	14.136						milla	4.9
nolaba	7.1	10.3939	8.9	14.8408						gongottu	4.8	0
unknown	5.3	10.2147	7.1	10.3939						karawala kebilla	2.4	3.9
kuratiya	8.9	14.8408	10.4	21.8066						karawaakebia	4.8
kuratiya	8.5	13.4838	10.2	20.7066						nelli		2.8
kuratiya	7.8	11.6161	9.2	15.9969						nelli		2.6
damaniya	5.7	9.88574	7	10.272						nelli		2.9
damaniya	6.8	10.0677	8.1	12.3375						nelli		3.2
damaniya	9.9	19.1554	11.3	27.4087
kuratiya	11.6	29.5132	12.8	39.1164
welan	17.8	99.5467	19.3	124.097
kuratiya	8.8	14.4818	9.7	18.1871
kuratiya	7.1	10.3939	8	12.0839
kuratiya	5.9	9.80028	6.7	9.98528
kuratiya	6.9	10.1633	7.5	11.0133
welan	38.1	683.144	39.8	756.648
dunumadal	12.3	34.8846	13.5	45.5943
welan	49.9	1271.84	50.5	1306.68
ginisiriya	6.8	10.0677	8.2	12.6043
ginisiriya	17.3	92.0219	18.9	117.261
eraminiya	5.7	9.88574	7.1	10.3939
welan	41.3	824.667	42.6	886.013
nolaba	7.5	11.0133	8.6	13.8033
dunumadal	15.7	70.1551	17.4	93.5005
dunumadal	29	354.407	30.3	394.691
welan		4326.41	5.2	10.3299
kuratiya			5	10.5998
welan			5.3	10.2147
kuratiya			5.3	10.2147
				4738.82

## Sheet: Sheet10
12.6m					stump		bush			3m (1.5>5)			3m (30>1.5)			3m (30<)			Inasive spp
tree	DBh (2013)	biomass 2013	dbh (2018)	biomass 2018	2013	2018	spp	2013	2018	spp	2013	2018	spp	2013	2018	Spp	2013	2018	spp	2013	2018
welan	61.6	2036.63	62	2065.97	4		0			gammalu	4		welan	4	12	balunaguta	8	81	lantana	30	0
welan	18.9	117.261	19.6	129.363						welan	3.5	4.8
katakela	52.7	1438.46	53.2	1469.3						hulanhik	3.8
katakela	18.3	107.401	19	118.95						nelli		4.6
welan	11.7	30.241	13	40.9014						nelli		3.6
		3729.99		3824.48						karanda		3
										nelli		3.1
