# Supplementary material for: Impact of community-based forest restoration on stand structural attributes, aboveground biomass and carbon stock compared to state-managed forests in tropical ecosystems of Sri Lanka
Source: PeerJ journal article supplement (doi:10.7717/peerj.18176), 2024-09-26
Supplement: State_and_community_managed_forests_Raw_data.zip [file Gadaboyaya State own.xlsx]

## Sheet: Sheet1
12.6m					stump		bush			3m (1.5>5)			3m (30>1.5)			3m (30<)			Inasive spp
tree	DBh (2012)	Biomass 2012	dbh (2018)	biomass 2019	2012	2018	spp	2012	2018	spp	2012	2018	spp	2012	2018	Spp	2012	2018	spp	2012	2018
molaba	5.8	9.83642	7	10.272	0		indi	2		nelli	3.2		gammalu	2	4	Bowitiya	8	12	Lantana	8	16
rana	7.8	11.6161	8.8	14.4818						karanda	2.6								mana	6	18
bala	23.6	210.901	24.5	232.151						nelli	2.5								Gini grass	5	9
molaba	8.6	13.8033	9.8	18.6647						gketakela	3.1
kiriwel	13	40.9014	13.6	46.5724						ginusupu	2.9
malaba	9.5	17.2715	10.6	22.9593						ginisiriya	1.2
kaluwara	42.8	895.648	43.4	924.871						gammalu		1.8
mora	5.7	9.88574	6.5	9.86						kobba		1.6
nolaba	10.7	23.5554	11.6	29.5132
galsiyabala	5.8	9.83642	7.1	10.3939
nolaba	11.3	27.4087	12.1	33.284
bala	16.5	80.667	17.3	92.0219
welan	7.4	10.8387	8.7	14.136
bala	23.7	213.209	24.6	234.578
niriwel	6.2	9.77086	6.8	10.0677
hagilla	5	10.5998	5.6	9.94824
nolaba	5.1	10.4583	6.5	9.86
mora	5	10.5998	6.4	9.81712
bala	19.6	129.363	20.7	149.685
nalupani	32.4	464.468	33.6	506.949
karaw	7.6	11.2011	8.8	14.4818
bala	23.6	210.901	24.5	232.151
nalupani	21.8	171.601	23	197.326
bala	26.5	283.194	27.4	307.882
rana	21.6	167.497	22.8	192.907
rana	11.8	30.982	13.1	41.8136
kuratiya	11.9	31.7362	12.6	37.3842
mora	6.7	9.98528	8.2	12.6043
bala	6	9.7773	7.8	11.6161
bala	5	10.5998	7	10.272
nalupani	6.7	9.98528	7.9	11.8434
nolaba	8.9	14.8408	10.5	22.3764
welan	18.7	113.921	20.2	140.25
makulla	6.8	10.0677	8.4	13.1775
galsiyabala	12.6	37.3842	14.2	52.7176
mora	6.5	9.86	7.8	11.6161
nolaba	24.7	237.018	26.2	275.202
bala	14.7	58.2008	16	73.9983
himbutu	8.4	13.1775	8.9	14.8408
mora	37.7	666.402	39.2	730.271
nolaba	21.4	163.447	22.8	192.907
mora	7.7	11.402	9.1	15.5984
mora	5	10.5998	6.6	9.91606
mora	10.5	22.3764	11.7	30.241
		4526.8		5043.48

## Sheet: Sheet2
12.6m					stump		bush			3m (1.5>5)			3m (30>1.5)			3m (30<)			Inasive spp
tree	DBh (2012)	biomass 2012	dbh (2018)	biomass 2018	2012	2018	spp	2012	2018	spp	2012	2018	spp	2012	2018	Spp	2012	2018	spp	2012	2018
mora	6.8	10.0677	7.9	11.8434	3		0			bolpana	1.5	4.2	bolpana	4	9	bolpana	12	21	0
gongotu	5.7	9.88574	6.8	10.0677						migonkarapincha	1.1
mora	10.6	22.9593	12.2	34.0777						bolpana	1.1	3.4
kudu daula	7.8	11.6161	9.3	16.4086						migonkarapincha	2.6
karaw	10.6	22.9593	11.9	31.7362						migonkarapincha		1.8
meegonkarapincha	11.7	30.241	13.2	42.739						migonkarapincha		2.5
kudu daula	23.5	208.605	24.8	239.472						mora	2.1	4.9
welan	24.6	234.578	0	34.4703						mora	2.6
mora	20.3	142.111	21.8	171.601
mora	17.6	96.4973	18.8	115.584
mora	13.4	44.6294	14.8	59.337
bala	5.6	9.94824	6.7	9.98528
bala	8.6	13.8033	9.7	18.1871
unknown	56.7	1694.39	57.4	1741.35
milla	13.5	45.5943	14.7	58.2008
bala	9.6	17.7227	10.8	24.1647
unknown	5	10.5998	6.3	9.7874
milla	13.4	44.6294	14.7	58.2008
bala	9.4	16.8335	10.8	24.1647
unknown	5.2	10.3299	6.8	10.0677
mora	13.4	44.6294	14.8	59.337
uru kanu	41.6	838.626	42.4	876.43
kudu daula	24.3	227.336	25.6	259.573
gal siyabala	40.4	783.5	41.2	820.04
milla	7.6	11.2011	8.4	13.1775
nolaba	13.2	42.739	14.6	57.0778
milla	51	1336.07	51.8	1383.78
milla	9.7	18.1871	11.2	26.7336
milla	36.2	605.497	0	34.4703
mora	19.6	129.363	20.7	149.685
mora	50.8	1324.27	51.3	1353.86
mora	8.9	14.8408	10.6	22.9593
		8074.26		7778.56

## Sheet: Sheet3
12.6m					stump		bush			3m (1.5>5)			3m (30>1.5)			3m (30<)			Inasive spp
tree	DBh (2012)	Biomass 2012	dbh (2018)	biomass 2019	2012	2018	spp	2012	2018	spp	2012	2018	spp	2012	2018	Spp	2012	2018	spp	2012	2018
kuratiya	5.4	10.1127	6.9	10.1633	4	5	0			welan	3.6		welan	6	8	thora	2	5	lantana	5	20
katupila	5.1	10.4583	6.7	9.98528						welan	3.1	4.6							mana	45	55
kukuruman	5	10.5998	5.7	9.88574						gammalu	2.6	2.9
kalumadiriya	5.2	10.3299	6.4	9.81712						gammalu		1.8
tementosa	7.4	10.8387	7.9	11.8434						welan		1.6
burutha	12.4	35.7046	13.1	41.8136
burutha	12.5	36.5378	13.2	42.739
burutha	15.2	64.0133	16.1	75.3057
burutha	16.3	77.96	17.2	90.5564
burutha	7.5	11.0133	8.6	13.8033
eraminiya	8.6	13.8033	9.2	15.9969
eraminiya	8.4	13.1775	8.8	14.4818
eraminiya	5.4	10.1127	5.9	9.80028
burutha	6.7	9.98528	7.9	11.8434
raana	7.4	10.8387	9	15.213
burutha	5.7	9.88574	6.9	10.1633
raana	7.8	11.6161	9.2	15.9969
burutha	5.3	10.2147	6.7	9.98528
damunu	42.5	881.215	43.8	944.616
penala	8.1	12.3375	9.6	17.7227
unknown	5.2	10.3299	6.5	9.86
ankenda	5.1	10.4583	6.5	9.86
damunu	23.4	206.323	24.7	237.018
ankenda	14.5	55.968	15.4	66.4305
burutha	7.6	11.2011	8.9	14.8408
burutha	7.8	11.6161	9	15.213
burutha	5.6	9.94824	6.8	10.0677
damunu	5.2	10.3299	6.7	9.98528
karapincha	7.6	11.2011	8.4	13.1775
milla	39.6	747.803	40.8	801.665
damunu	24.1	222.575	25.3	251.936
damunu		2568.51	5.4	10.1127
kuratiya			5.1	10.4583
				2842.36

## Sheet: Sheet4
12.6m					stump		bush			3m (1.5>5)			3m (30>1.5)			3m (30<)			Inasive spp
tree	DBh (2012)	biomass 2012	dbh (2018)	biomass 2019	2012	2018	spp	2012	2018	spp	2012	2018	spp	2012	2018	Spp	2012	2018	spp	2012	2018
damunu	36.4	613.447	37	637.611	0		indi	1		0			0			bowitiya	3	3	rila thana	25	40
dunumadala	17.8	99.5467	19.2	122.368															podisingnomaran	45	30
seru	5.6	9.94824	6.5	9.86															lantana	10	20
nolaba	6.9	10.1633	8.2	12.6043
nolaba	5.4	10.1127	6.8	10.0677
kukuruman	8.7	14.136	9.5	17.2715
kukuruman	7.2	10.529	7.9	11.8434
kukuruman	5.2	10.3299	5.8	9.83642
damunu	28.8	348.407	30	385.197
hulanhik	46.3	1072.8	46.7	1094.07
milla	11.5	28.7985	12.7	38.2437
kuratiya	6.6	9.91606	7.2	10.529
milla	21.2	159.449	22.5	186.377
milla	11	25.4228	12.4	35.7046
eraminiya	5.4	10.1127	5.7	9.88574
ketakela	38.6	704.368	39.5	743.4
		3137.48		3334.87

## Sheet: Sheet5
12.6m					stump		bush			3m (1.5>5)			3m (30>1.5)			3m (30<)			Inasive spp
tree	DBh (2012)	biomass 2012	dbh (2018)	biomass 2019	2012	2018	spp	2012	2018	spp	2012	2018	spp	2012	2018	Spp	2012	2018	spp	2012	2018
suriyamara	12.5	36.5378	13.4	44.6294	4	4	0			gongotu	1.1		migonkarapincha	12	23	migonkarapincha	28	49	hawarinuga	0.5	1
ankenda	12.6	37.3842	13.9	49.5857						gongotu	1.8
kahapenela	6.7	9.98528	7.8	11.6161						bolpana	0.7
damunu	8.2	12.6043	9.5	17.2715						yakinaran	1.5
milla	10.3	21.25	11.8	30.982						migonkarapincha		1.9
kuratiya	5.3	10.2147	5.9	9.80028						migonkarapincha		2.3
kuratiya	5.8	9.83642	6.3	9.7874						bolpana		1.6
kuratiya	5.2	10.3299	6.5	9.86
kuratiya	5.2	10.3299	6.4	9.81712
damunu	12.6	37.3842	13.8	48.5681
eraminiya	5.3	10.2147	5.8	9.83642
damunu	28.7	345.427	30	385.197
welan	5.7	9.88574	7.2	10.529
welan	6.4	9.81712	7.8	11.6161
rana	12.1	33.284	13.5	45.5943
kanda	13.5	45.5943	15.4	66.4305
kahabambarawel	6.3	9.7874	6.7	9.98528
dunumadala	9.1	15.5984	10.6	22.9593
kahabambarawel	9.2	15.9969	9.7	18.1871
nolaba	7.6	11.2011	8.7	14.136
nolaba	8.1	12.3375	9	15.213
damunu	17.6	96.4973	18.5	110.635
damunu	11.2	26.7336	12.5	36.5378
damba	34.5	540.054	34.9	555.11
damba	6.5	9.86	7.8	11.6161
liniya	6.3	9.7874	0	0
nolaba	8.4	13.1775	9.6	17.7227
katakela	9.3	16.4086	10.5	22.3764
katakela	40.7	797.104	41.6	838.626
kanda	24.5	232.151	0
nolaba	9.8	18.6647	11	25.4228
kududaula	9.7	18.1871	10.9	24.7872
kududaula	6.9	10.1633	8	12.0839
suriyamara	37.8	670.568	38.2	687.363
nolaba	7.8	11.6161	8.9	14.8408
nolaba	10.4	21.8066	11.6	29.5132
nolaba	8	12.0839	9.2	15.9969
		3219.86		3254.23

## Sheet: Sheet6
12.6m					stump		bush			3m (1.5>5)			3m (30>1.5)			3m (30<)			Inasive spp
tree	DBh (2012)	biomass 2012	dbh (2018)		2012	2018	spp	2012	2018	spp	2012	2018	spp	2012	2018	Spp	2012	2018	spp	2012	2018
nolaba	6.8	10.0677	8.2	12.6043	0		0			gongotu	1.1	3.2	gongotu	1		3			katakalu	2	7
nolaba	7.9	11.8434	9.3	16.4086						gongotu	1	2.8							gall	1	5
gongotu	7.8	11.6161	9.3	16.4086						gongotu	1.1	2.9
eraminiya	5.6	9.94824	6.2	9.77086						gongotu	1.1	2.9
radaliyawel	10.3	21.25	10.8	24.1647
radaliyawel	5.4	10.1127	5.9	9.80028
nolaba	6.5	9.86	7.2	10.529
suriyamara	38.7	708.652	39.6	747.803
suriyamara	6.1	9.7675	7.3	10.6773
mill	8.4	13.1775	9.7	18.1871
radaliyawel	7.1	10.3939	7.7	11.402
nolaba	7	10.272	8.4	13.1775
dunumadala	32.8	478.418	34.2	528.9
wal midi	5.2	10.3299	5.6	9.94824
mahathambala	6.1	9.7675	7.4	10.8387
mahathambala	6.5	9.86	7.7	11.402
gongotu	6.7	9.98528	7.8	11.6161
gongotu	7.5	11.0133	8.6	13.8033
suriyamara	13.4	44.6294	14.7	58.2008
milla	6	9.7773	7.2	10.529
nolaba	7.7	11.402	9	15.213
		1432.14		1571.39

## Sheet: Sheet7
12.6m					stump		bush			3m (1.5>5)			3m (30>1.5)			3m (30<)			Inasive spp
tree	DBh (2012)	biomass 2012	dbh (2018)	biomass 2019	2012	2018	spp	2012	2018	spp	2012	2018	spp	2012	2018	Spp	2012	2018	spp	2012	2018
pethan	7.6	11.2011	8.8	14.4818	0		0			thamiliya	4.6		dimbi biju	5	8	dimbi biju	3	12	ginigrass	2	8
pethan	8.4	13.1775	9.5	17.2715						thamiliya	1.5	2.7							katakalu	4	10
thelambhu	11.4	28.097	12.7	38.2437						thamiliya	3.4	4.1							mist	1	6
mahathambala	7	10.272	8.2	12.6043						kududaula	3.1	4
mahathambala	6	9.7773	7.3	10.6773						thamiliya	3.4	3.8
ada kirala	9.5	17.2715	10.7	23.5554						migonkarapincha	2.9	3.7
pethan	6.5	9.86	7.9	11.8434						wellangiriya	2.3	0
pethan	5	10.5998	6.1	9.7675						thamiliya	1.7	0
yarawel	6.6	9.91606	7.1	10.3939
yarawel	7.4	10.8387	7	10.272
gal kera	8	12.0839	8.9	14.8408
gongotu	5	10.5998	6.2	9.77086
pethan	6.3	9.7874	7.1	10.3939
karakola	9.8	18.6647	10.3	21.25
hik	32.6	471.417	33.4	499.737
hik	38.2	687.363	39	721.584
weera	42.1	862.155	42.6	886.013
pethan	7.8	11.6161	8.7	14.136
		2214.7		2336.84

## Sheet: Sheet8
12.6m					stump		bush			3m (1.5>5)			3m (30>1.5)			3m (30<)			Inasive spp
tree	DBh (2012)	biomass 2012	dbh (2018)	biomass 2019	2012	2018	spp	2012	2018	spp	2012	2018	spp	2012	2018	Spp	2012	2018	spp	2012	2018
wali waraka	5.4	10.1127	6.5	9.86	3		0			kudu daula	3.8		kududaula	1	4	nolaba	3	5	mana	5	15
dunumadal	11.5	28.7985	12.7	38.2437						kudu daula	4.1
wali waraka	7.3	10.6773	8.6	13.8033						welan	3.2	4.8
welan	8.7	14.136	10	19.6593						welan		1.8
welan	5.6	9.94824	6.9	10.1633
weli waraka	8.7	14.136	9.8	18.6647
weli waraka	10.6	22.9593	11.8	30.982
seru	7.8	11.6161	8.9	14.8408
welan	23.6	210.901	24	220.213
welan	6.8	10.0677	8.2	12.6043
welan	6.2	9.77086	7.9	11.8434
ahala	12.4	35.7046	13.9	49.5857
ahala	15.6	68.9004	16.9	86.2391
seru	9.3	16.4086	10.7	23.5554
seru	8.7	14.136	9.7	18.1871
welan	5.6	9.94824	7.3	10.6773
welan	9	15.213	10.2	20.7066
wali waraka	10.4	21.8066	11.8	30.982
wali waraka	11	25.4228	12.5	36.5378
weli waraka	9.7	18.1871	11.3	27.4087
weli waraka	8.5	13.4838	9.6	17.7227
welan	12.6	37.3842	13.8	48.5681
welan	38.7	708.652	39.4	739.011
welan	9.3	16.4086	10.6	22.9593
wali waraka	8.4	13.1775	9.8	18.6647
weli waraka	6.9	10.1633	8.2	12.6043
weli waraka	7	10.272	8.3	12.8843
weli waraka	7.1	10.3939	8.3	12.8843
makulla	20.5	145.871	21.7	169.542
makulla	12.6	37.3842	13.8	48.5681
milla	25.7	262.145	26.9	294.035
welan	12.5	36.5378	13.8	48.5681
welan	9.8	18.6647	10.6	22.9593
yakdamaran	9.1	15.5984	10.2	20.7066
yakdamaran	8.7	14.136	10	19.6593
milla	24.8	239.472	26.1	272.564
		2168.59		2486.66

## Sheet: Sheet9
12.6m					stump		bush			3m (1.5>5)			3m (30>1.5)			3m (30<)			Inasive spp
tree	DBh (2012)	biomass 2012	dbh (2018)	biomass 2019	2012	2018	spp	2012	2018	spp	2012	2018	spp	2012	2018	Spp	2012	2018	spp	2012	2018
katakala	9.8	18.6647	10.7	23.5554	0	2	0			welan	2.6		yakinaran	5	9	yakinaran	10	10	lantana	20	30
katakala	10	19.6593	0							kon	2.2	3.3
dunumadala	21.2	159.449	22.6	188.54						kon	2.2	3.1
thelambu	21.6	167.497	22.8	192.907						tharana	1.6	2.1
thelambu	46.1	1062.24	46.7	1094.07						tharana	1.2	2
hik	13.4	44.6294	13.9	49.5857						yakinaran	1.6	2
hik	18.6	112.271	19.8	132.939						tharana	2.1	2.8
hik	26.5	283.194	27.9	322.059						yakinaran		4.1
mahathambala	7.6	11.2011	8.7	14.136						yakinaran		1.6
teak	20.5	145.871	21.3	161.441
kon	21.4	163.447	22.2	179.965
dunumadala	11.2	26.7336	12	32.5035
kukuruman	5.1	10.4583	5.7	9.88574
hik	11	25.4228	11.8	30.982
hik	8.7	14.136	10.1	20.1764
atamba	46.3	1072.8	46.8	1099.42
nolaba	6	9.7773	7.2	10.529
kolon	20.6	147.772	21.4	163.447
nolaba	7.3	10.6773	8.6	13.8033
puwakgediya wel	10.6	22.9593	11	25.4228
puwakgediya wel	9.3	16.4086	9.7	18.1871
kukuruman	5.4	10.1127	5.8	9.83642
welan	18.2	105.804	19.5	127.595
damunu	8.6	13.8033	9.8	18.6647
damunu	7.2	10.529	8.6	13.8033
damunu	9.3	16.4086	10.7	23.5554
karakola	5.7	9.88574	6.3	9.7874
		3711.81		3986.8

## Sheet: Sheet10
12.6m					stump		bush			3m (1.5>5)			3m (30>1.5)			3m (30<)			Inasive spp
tree	DBh (2012)	Biomass 2012	dbh (2018)	biomass 2019	2012	2018	spp	2012	2018	spp	2012	2018	spp	2012	2018	Spp	2012	2018	spp	2012	2018
kon	7.3	10.6773	8.7	14.136	4	4	0			kudu daula	2.4	3.1	kududaula	4	6	monarakudumbiya	78	62	podisinghomaran	3	10
kon	6.5	9.86	7.8	11.6161						burulla	1.5	2.1							katakalu	1	8
kon	8.2	12.6043	9.8	18.6647						bombu	1.8	2.3
teak	7.9	11.8434	9.3	16.4086						kudu daula	4.6
teak	11.4	28.097	12.6	37.3842						milla	3.3	3.9
teak	17.2	90.5564	18.6	112.271						bolpana		1.8
teak	13	40.9014	13.9	49.5857						bala		2.1
kon	14.7	58.2008	16.2	76.6263
teak	21.5	165.465	22.7	190.717
dunu madala	31.5	433.853	32.4	464.468
kon	32.9	481.938	34.2	528.9
ipil	8.1	12.3375	10.3	21.25
thelabu	11	25.4228	12.1	33.284
ipil	8.4	13.1775	9.8	18.6647
kon	12.1	33.284	13.4	44.6294
kon	5.3	10.2147	6.8	10.0677
damunu	12.7	38.2437	14.2	52.7176
ipil	6.7	9.98528	8	12.0839
teak	6.6	9.91606	7.8	11.6161
teak	16.5	80.667	17.7	98.0154
teak	20.1	138.403	21.5	165.465
katakela	11.5	28.7985	12.6	37.3842
		1744.45		2025.96
