# Supplementary material for: Impact of community-based forest restoration on stand structural attributes, aboveground biomass and carbon stock compared to state-managed forests in tropical ecosystems of Sri Lanka
Source: PeerJ journal article supplement (doi:10.7717/peerj.18176), 2024-09-26
Supplement: State_and_community_managed_forests_Raw_data.zip [file Gedaboyaya community(1).xlsx]

## Sheet: Sheet1
12.6m					stump		bush			3m (1.5>5)			3m (30>1.5)			3m (30<)			Inasive spp
tree	DBh (2012)	biomass 2012	dbh (2018)	Biomass 2019	2012	2018	spp	2012	2018	spp	2012	2018	spp	2012	2018	Spp	2012	2018	spp	2012	2018
welan	5.7	9.88574	6.8	10.0677	0		indi	2		nelli	3.2		gammalu	2	4	Bowitiya	8	12	Lantana	8	16
nolaba	6.7	9.98528	7.9	11.8434						karanda	2.6								mana	6	18
memontoza	5.1	10.4583	5.8	9.83642						nelli	2.5								Gini grass	5	9
eraminiya	5.6	9.94824	0	34.4703						gketakela	3.1
kuratiya	5.6	9.94824	6.1	9.7675						ginusupu	2.9
kuratiya	5.3	10.2147	5.9	9.80028						ginisiriya	1.2
ginisiriya	6.2	9.77086	8.7	14.136						gammalu		1.8
eraminiya	5.1	10.4583	0	34.4703						kobba		1.6
kuratiya	5.7	9.88574	6.7	9.98528
ginisiriya	15.6	68.9004	17.8	99.5467
welan	18.6	112.271	19.8	132.939
kalawel	5.6	9.94824	6	9.7773
welan	34.3	532.605	35	558.907
		814.281		945.547

## Sheet: Sheet2
12.6m					stump		bush			3m (1.5>5)			3m (30>1.5)			3m (30<)			Inasive spp
tree	DBh (2012)	biomass 2012	dbh (2018)	biomass 2019	2012	2018	spp	2012	2018	spp	2012	2018	spp	2012	2018	Spp	2012	2018	spp	2012	2018
kohomba	9.5	17.2715	10.3	21.25	3		0			bolpana	1.5	4.2	bolpana	4	9	bolpana	12	21	0
katakela	51.6	1371.77	52.4	1420.11						migonkarapincha	1.1
seru	11.5	28.7985	12.7	38.2437						bolpana	1.1	3.4
seru	10	19.6593	11.2	26.7336						migonkarapincha	2.6
teak	9.4	16.8335	10.6	22.9593						migonkarapincha		1.8
teak	9.2	15.9969	10.5	22.3764						migonkarapincha		2.5
damunu	27.8	319.197	28.7	345.427						mora	2.1	4.9
nolaba	12.7	38.2437	13.8	48.5681						mora	2.6
demata	5.8	9.83642	6.9	10.1633
karakola	6.3	9.7874	6.8	10.0677
karakola	6	9.7773	6.6	9.91606
damunu	8.5	13.4838	9.8	18.6647
damunu	9.2	15.9969	10.8	24.1647
damunu	11.4	28.097	12.9	40.0023
damunu	26.7	288.588	27.9	322.059
damunu	7.2	10.529	8.9	14.8408
damunu		2213.87	5.4	10.1127
damunu			5	10.5998
demata			5.2	10.3299
				2426.59

## Sheet: Sheet3
12.6m					stump		bush			3m (1.5>5)			3m (30>1.5)			3m (30<)			Inasive spp
tree	DBh (2012)	Biomass 2012	dbh (2018)	biomass 2019	2012	2018	spp	2012	2018	spp	2012	2018	spp	2012	2018	Spp	2012	2018	spp	2012	2018
ipil	13.4	44.6294	15.3	65.2153	4	5	0			welan	3.6		welan	6	8	thora	2	5	lantana	5	20
kukuruman	7.4	10.8387	7.8	11.6161						welan	3.1	4.6							mana	45	55
siyabala	23.5	208.605	24.3	227.336						gammalu	2.6	2.9
damunu	10.4	21.8066	12.1	33.284						gammalu		1.8
damunu	5.8	9.83642	7.2	10.529						welan		1.6
nolaba	7.2	10.529	8.7	14.136
damunu	8.4	13.1775	10	19.6593
ipil	11.4	28.097	13.8	48.5681
ipil	8.7	14.136	11	25.4228
ahala	8.4	13.1775	9.5	17.2715
magulkaranda	16.8	84.8263	17.6	96.4973
kukuruman	5.8	9.83642	6.5	9.86
nolaba	15.7	70.1551	16.9	86.2391
nolaba	7.4	10.8387	8.5	13.4838
nolaba	11.3	27.4087	12.5	36.5378
damunu	14.2	52.7176	15.9	72.7041
melantosa	5.4	10.1127	6	9.7773
melantosa	6.2	9.77086	6.9	10.1633
pethan	5.6	9.94824	6.5	9.86
pethan	11	25.4228	11.8	30.982
damunu	6.4	9.81712	8.1	12.3375
		695.688		861.481

## Sheet: Sheet4
12.6m					stump		bush			3m (1.5>5)			3m (30>1.5)			3m (30<)			Inasive spp
tree	DBh (2012)	bomass 2012	dbh (2018)	Biomass 2018	2012	2018	spp	2012	2018	spp	2012	2018	spp	2012	2018	Spp	2012	2018	spp	2012	2018
wawarana	10.3	21.25	11.7	30.241	0		indi	1		0			0			bowitiya	3	3	rila thana	25	40
ahala	7.4	10.8387	8.5	13.4838															podisingnomaran	45	30
welan	10.7	23.5554	12	32.5035															lantana	10	20
seru	6.8	10.0677	7.5	11.0133
seru	6	9.7773	7.4	10.8387
welan	8.7	14.136	10.1	20.1764
yakadamaran	10.7	23.5554	11.6	29.5132
seru	6.8	10.0677	7.9	11.8434
seru	5.4	10.1127	6.8	10.0677
maduhanassa	6.4	9.81712	8.3	12.8843
eraminiya	7.4	10.8387	7.9	11.8434
wawarana	6.2	9.77086	7.8	11.6161
wawarana	5.4	10.1127	7	10.272
yakadamaran	19.6	129.363	20.7	149.685
yakadamaran	10.5	22.3764	11.7	30.241
kaluwalla	5	10.5998	5.8	9.83642
puwakgediyawel	5.2	10.3299	5.8	9.83642
puwakgediyawel	8.7	14.136	9.6	17.7227
wawarana	29.4	366.565	30.8	410.778
wawarana	13.5	45.5943	15	61.6488
wawarana	10.6	22.9593	12	32.5035
wawarana	9.7	18.1871	11.3	27.4087
wawarana	11.5	28.7985	12.9	40.0023
wawarana	15.4	66.4305	16.8	84.8263
wawarana	10.5	22.3764	11.9	31.7362
wawarana		931.617	5.4	10.1127
				1132.63

## Sheet: Sheet5
12.6m					stump		bush			3m (1.5>5)			3m (30>1.5)			3m (30<)			Inasive spp
tree	DBh (2012)	Biomass 2012	dbh (2018)	Biomass 2018	2012	2018	spp	2012	2018	spp	2012	2018	spp	2012	2018	Spp	2012	2018	spp	2012	2018
kuratiya	5.2	10.3299	6.8	10.0677	4	4	0			gongotu	1.1		migonkarapincha	12	23	migonkarapincha	28	49	hawarinuga	0.5	1
welan	8.9	14.8408	10.2	20.7066						gongotu	1.8
welan	6.3	9.7874	7.8	11.6161						bolpana	0.7
dambu	5.8	9.83642	7.1	10.3939						yakinaran	1.5
yakadamaran	6.7	9.98528	7.8	11.6161						migonkarapincha		1.9
yakadamaran	8.4	13.1775	9.8	18.6647						migonkarapincha		2.3
eraminiya	5.4	10.1127								bolpana		1.6
kuratiya	8.4	13.1775	9.6	17.7227
dunumadala	23.1	199.556	24	220.213
hik	9.4	16.8335	10.7	23.5554
eraminiya	5.7	9.88574
kuratiya	6.4	9.81712	7.8	11.6161
eraminiya	5.3	10.2147	5.8	9.83642
seru	5.6	9.94824	6.4	9.81712
hik		347.503	5.8	9.83642
				385.663

## Sheet: Sheet6
12.6m					stump		bush			3m (1.5>5)			3m (30>1.5)			3m (30<)			Inasive spp
tree	DBh (2012)	biomass 2012	dbh (2018)	Biomass 2019	2012	2018	spp	2012	2018	spp	2012	2018	spp	2012	2018	Spp	2012	2018	spp	2012	2018
ahala	8.7	14.136	10.1	20.1764	0		0			gongotu	1.1	3.2	gongotu	1		3			katakalu	2	7
ahala	5.8	9.83642	7.2	10.529						gongotu	1	2.8							gall	1	5
milla	9.3	16.4086	11	25.4228						gongotu	1.1	2.9
milla	6.2	9.77086	7.9	11.8434						gongotu	1.1	2.9
welan	7.6	11.2011	9.3	16.4086
welan	6.5	9.86	8	12.0839
seru	18.5	110.635	19.8	132.939
ahala	8.4	13.1775	9.9	19.1554
ahala	8.1	12.3375	9.8	18.6647
yakadamaran	12.3	34.8846	13	40.9014
kuratiya	5.4	10.1127	6.9	10.1633
kuratiya	6.2	9.77086	7.4	10.8387
eraminiya	5.4	10.1127	5.8	9.83642
eraminiya	5.7	9.88574	6.4	9.81712
kuratiya	5.7	9.88574	6.9	10.1633
ginisiriya	23.2	201.798	25.1	246.911
eraminiya	5.3	10.2147	5.9	9.80028
welan	6.4	9.81712	7	10.272
welan		513.845	5.4	10.1127
welan			6.2	9.77086
				645.81

## Sheet: Sheet7
12.6m					stump		bush			3m (1.5>5)			3m (30>1.5)			3m (30<)			Inasive spp
tree	DBh (2012)	Biomass 2012	dbh (2018)	Biomass 2018	2012	2018	spp	2012	2018	spp	2012	2018	spp	2012	2018	Spp	2012	2018	spp	2012	2018
ginisiriya	10.3	21.25	12.5	36.5378	0		0			thamiliya	4.6		dimbi biju	5	8	dimbi biju	3	12	ginigrass	2	8
ginisiriya	9.5	17.2715	11.6	29.5132						thamiliya	1.5	2.7							katakalu	4	10
burutha	25.7	262.145	27.6	313.513						thamiliya	3.4	4.1							mist	1	6
kuratiya	5	10.5998	6.8	10.0677						kududaula	3.1	4
welan	6.7	9.98528	8.2	12.6043						thamiliya	3.4	3.8
kuratiya	7.4	10.8387	8.6	13.8033						migonkarapincha	2.9	3.7
welan	38.5	700.097	39.2	730.271						wellangiriya	2.3	0
ginisiriya	11.5	28.7985	13.4	44.6294						thamiliya	1.7	0
welan		1060.99	5.6	9.94824
welan			5	10.5998
				1211.49

## Sheet: Sheet8
12.6m					stump		bush			3m (1.5>5)			3m (30>1.5)			3m (30<)			Inasive spp
tree	DBh (2012)	Biomass 2012	dbh (2018)	Biomass 2019	2012	2018	spp	2012	2018	spp	2012	2018	spp	2012	2018	Spp	2012	2018	spp	2012	2018
katakala	9.8	18.6647	11	25.4228	3		0			kudu daula	3.8		kududaula	1	4	nolaba	3	5	mana	5	15
dunumadala	10.3	21.25	11.8	30.982						kudu daula	4.1
hik	25.6	259.573	26.7	288.588						welan	3.2	4.8
kon	18.7	113.921	19.5	127.595						welan		1.8
kon	20.3	142.111	21.7	169.542
hik	7.8	11.6161	9	15.213
hik	7	10.272	8.6	13.8033
hik	5.7	9.88574	6.8	10.0677
dunumadala	9.4	16.8335	10.7	23.5554
kukuruman	6.3	9.7874	6.9	10.1633
eraminiya	5.6	9.94824	6.3	9.7874
hik	6.9	10.1633	8.1	12.3375
hik	32	450.729	33.3	496.151
		1084.76		1233.21

## Sheet: Sheet9
12.6m					stump		bush			3m (1.5>5)			3m (30>1.5)			3m (30<)			Inasive spp
tree	DBh (2012)	Biomass 2012	dbh (2018)	Biomass 2019	2012	2018	spp	2012	2018	spp	2012	2018	spp	2012	2018	Spp	2012	2018	spp	2012	2018
katakela	19.6	129.363	20.7	149.685	0	2	0			welan	2.6		yakinaran	5	9	yakinaran	10	10	lantana	20	30
seru	7.3	10.6773	8.5	13.4838						kon	2.2	3.3
seru	5.7	9.88574	6.9	10.1633						kon	2.2	3.1
kohomba	9.6	17.7227	10.6	22.9593						tharana	1.6	2.1
demata	9.3	16.4086	10.5	22.3764						tharana	1.2	2
demata	14	50.6165	15.1	62.8245						yakinaran	1.6	2
kahapenala	6.8	10.0677	7.7	11.402						tharana	2.1	2.8
kahapenala	7.4	10.8387	8.5	13.4838						yakinaran		4.1
karakola	6.1	9.7675	6.7	9.98528						yakinaran		1.6
damunu	18.7	113.921	20	136.568
damunu	13.6	46.5724	14.8	59.337
damunu	9	15.213	10.3	21.25
igini	8.9	14.8408	10.2	20.7066
kuratiya	5.4	10.1127	6.3	9.7874
igini	7.8	11.6161	8.9	14.8408
kahapenala	5.7	9.88574	6.6	9.91606
kohomba	5.2	10.3299	6.6	9.91606
		497.84		598.685

## Sheet: Sheet10
12.6m					stump		bush			3m (1.5>5)			3m (30>1.5)			3m (30<)			Inasive spp
tree	DBh (2012)	Biomass 2012	dbh (2018)	biomass 2019	2012	2018	spp	2012	2018	spp	2012	2018	spp	2012	2018	Spp	2012	2018	spp	2012	2018
nolaba	5.8	9.83642	7.2	10.529	4	4	0			kudu daula	2.4	3.1	kududaula	4	6	monarakudumbiya	78	62	podisinghomaran	3	10
welan	6.7	9.98528	8	12.0839						burulla	1.5	2.1							katakalu	1	8
hinguruwel	5.6	9.94824	6.1	9.7675						bombu	1.8	2.3
hinguruwel	5.3	10.2147	5.7	9.88574						kudu daula	4.6
mahathabala	5.8	9.83642	6.7	9.98528						milla	3.3	3.9
seru	9.5	17.2715	10.4	21.8066						bolpana		1.8
seru	5.9	9.80028	7	10.272						bala		2.1
puwakgediyawel	6	9.7773	6.5	9.86
puwakgediyawel	5.4	10.1127	5.9	9.80028
ketakela	28.4	336.565	29.1	357.427
kolon	31.2	423.884	32.5	467.936
damunu	8.3	12.8843	9.5	17.2715
damunu	5.4	10.1127	6.7	9.98528
damunu	10	19.6593	11.2	26.7336
damunu	6.3	9.7874	7.4	10.8387
welan	5.6	9.94824	6.7	9.98528
mahathabala	6.1	9.7675	7.2	10.529
kon	14.3	53.7879	15.6	68.9004
kon	21.3	161.441	22	175.756
welan	5.8	9.83642	7.4	10.8387
welan		1154.46	5.4	10.1127
				1280.3
