# Supplementary material for: Impact of community-based forest restoration on stand structural attributes, aboveground biomass and carbon stock compared to state-managed forests in tropical ecosystems of Sri Lanka
Source: PeerJ journal article supplement (doi:10.7717/peerj.18176), 2024-09-26
Supplement: State_and_community_managed_forests_Raw_data.zip [file Hawannarawa community(1).xlsx]

## Sheet: Sheet1
12.6m					stump		bush			3m (1.5>5)			3m (30>1.5)			3m (30<)			Inasive spp
tree	DBh (2012)	biomass 2012	dbh (2018)	Biomass 2019	2012	2018	spp	2012	2018	spp	2012	2018	spp	2012	2018	Spp	2012	2018	spp	2012	2018
nitol	13.2	42.739	13.7	47.5637	3	0	indi	2		nelli		3.8	podisinghomaran	3	12	Balunaguta	25	46	lantana	0.08	0
madan	7.1	10.3939	8.5	13.4838						nelli		4.1							naththa suriya	0.07	7
hampalanda	9.2	15.9969	10.4	21.8066						nelli		2.8							mana	0.3	10
kalawel	9.2	15.9969	9.4	16.8335						nelli		3.8							gini grass	0.12	0
welan	23	197.326	23.8	215.531						nelli		3.2							podisinghomaran	0.03	0
welan	24.7	237.018	25	244.418						ginisapu		4.8
welan	20.2	140.25	21.4	163.447
welan	13.2	42.739	14.8	59.337
kalawel	12.1	33.284	12.7	38.2437
hampalanda	13.2	42.739	14.5	55.968
nitol	18.3	107.401	18.8	115.584
bhukenda	10.3	21.25	11.8	30.982
kalawel	9.3	16.4086	9.8	18.6647
damunu	28.2	330.723	29.5	369.638
welan	11.4	28.097	12.1	33.284
welan	11	25.4228	11.8	30.982
welan	9.7	18.1871	10.6	22.9593
welan	12.2	34.0777	13	40.9014
welan	8.3	12.8843	9.8	18.6647
welan	7.6	11.2011	9	15.213
madan	12.2	34.0777	13	40.9014
welan	13.3	43.6776	13.9	49.5857
welan	10.4	21.8066	11.2	26.7336
welan		1483.7	6.7	9.98528
				1700.71

## Sheet: Sheet2
12.6m					stump		bush			3m (1.5>5)			3m (30>1.5)			3m (30<)			Inasive spp
tree	DBh (2012)	Biomass 2012	dbh (2018)	Biomass 2019	2012	2018	spp	2012	2018	spp	2012	2018	spp	2012	2018	Spp	2012	2018	spp	2012	2018
welan	15.6	68.9004	17.2	90.5564	0		0			nelli		3.6	gammalu	2	14	gini grass	1	85	naththa S	12	10
welan	17.3	92.0219	18.1	104.22						nelli		3.2							lanthana	7	2
puswel	11.4	28.097	11.8	30.982						nelli		1.9							Gini grass	65	0
daba	23.2	201.798	24.6	234.578						nelli		2.6
hamplanda	11.3	27.4087	12.6	37.3842						nelli		3.6
puswel	8.7	14.136	9.1	15.5984						nelli		3.1
damba	36.8	629.503	37.5	658.11						welan	4.2
welan	11.4	28.097	12.3	34.8846						welan	3.6	4.8
kalawel	5.6	9.94824	6.3	9.7874
yakinaran	6.4	9.81712	7.1	10.3939
yakinaran	5.7	9.88574	6.8	10.0677
kalawel	5.8	9.83642	6.3	9.7874
kalawel	7.1	10.3939	7.5	11.0133
welan	5.8	9.83642	7	10.272
yakinaran		1149.68	5.3	10.2147
yakinaran			5.1	10.4583
welan			5.6	9.94824
				1298.26

## Sheet: Sheet3
12.6m					stump		bush			3m (1.5>5)			3m (30>1.5)			3m (30<)			Inasive spp
tree	DBh (2012)	Biomass 2012	dbh (2018)	biomass 2019	2012	2018	spp	2012	2018	spp	2012	2018	spp	2012	2018	Spp	2012	2018	spp	2012	2018
hampalanda	18.7	113.921	19.3	124.097	0		0			nelli		2.1		0	23	hulan thala	2	78	gini grass	0.7	0
welan	11.6	29.5132	12.3	34.8846						nelli		3.2							naththa suriya	0.2	20
damba	15.6	68.9004	16.8	84.8263						nelli		2.7							rila thana	3	0
welan	21.4	163.447	22.3	182.089						nelli		3.5							balu naguta	3	2
kalawel	7.2	10.529	7.5	11.0133						ginisapu		4.1							lantana	2	0
kalawel	7.5	11.0133	7.8	11.6161						nelli		3.4
nitol	24	220.213	24.6	234.578						damba	4.6
welan	7.3	10.6773	8.9	14.8408
welan	7.8	11.6161	9.1	15.5984
		639.831		713.544

## Sheet: Sheet4
12.6m					stump		bush			3m (1.5>5)			3m (30>1.5)			3m (30<)			Inasive spp
tree	DBh (2012)	biomass 2012	dbh (2018)	biomass 2019	2012	2018	spp	2012	2018	spp	2012	2018	spp	2012	2018	Spp	2012	2018	spp	2012	2018
welan	8.3	12.8843	9.1	15.5984	5	5				gammalu	2.5		bowitiya	8	12	thora	6	98	lantana	6	0
welan	13.2	42.739	13.9	49.5857						karanda		1.9							mana	35	10
kon	21.3	161.441	22	175.756						nelli	4.6								gini grass	20	0
kalawel	6.5	9.86	7	10.272						nelli		3.8							naththasuriya	10	5
kalawel	8.3	12.8843	8.7	14.136						nelli		2.9
kon	38.9	717.26	39.4	739.011						nelli		3.6
welan	11.5	28.7985	12.2	34.0777						nelli		2.6
damba	24.3	227.336	25.1	246.911						nelli		4.1
damba	30.2	391.513	30.9	414.035						nelli		3.9
welan	15.6	68.9004	16.4	79.3069						karanda		3.1
damba	11	25.4228	11.8	30.982						nelli		4.7
welan	9.4	16.8335	10.2	20.7066
welan		1715.87	5.2	10.3299
welan			5	10.5998
				1851.31

## Sheet: Sheet5
12.6m					stump		bush			3m (1.5>5)			3m (30>1.5)			3m (30<)			Inasive spp
tree	DBh (2012)	biomass 2012	dbh (2018)	biomass 2019	2012	2018	spp	2012	2018	spp	2012	2018	spp	2012	2018	Spp	2012	2018	spp	2012	2018
kon	7.9	11.8434	8.7	14.136	0		indi	2		nelli	3.7		pera	6	18	Bowitiya	8	102	Lantana	50	0
kon	22.3	182.089	23.8	215.531						ginisiriya	3.2								Mana	20	5
kon	31.6	437.202	32.2	457.573						karanda		2.6							Gini grass	10	0
welan	17.8	99.5467	19	118.95						nelli		2.1
kalawel	8.5	13.4838	6.8	10.0677						nelli		1.8
welan	12.3	34.8846	13.8	48.5681						nelli		2.3
damba	17.6	96.4973	18.8	115.584						nelli		3.6
kalawel	10.3	21.25	10.8	24.1647						ginisiriya		4.1
welan	8.2	12.6043	10	19.6593						batu		1.8
kalawel	8.9	14.8408	9.2	15.9969
kalawel	11.3	27.4087	11.6	29.5132
damba	49	1220.48	49.3	1237.48
welan	5.3	10.2147	6.8	10.0677
welan	6.3	9.7874	6.3	9.7874
welan		2192.13	5.6	9.94824
kon			5.3	10.2147
welan			5.2	10.3299
				2357.57

## Sheet: Sheet6
12.6m					stump		bush			3m (1.5>5)			3m (30>1.5)			3m (30<)			Inasive spp
tree	DBh (2012)	biomass 2012	dbh (2018)	biomass 2019	2012	2018	spp	2012	2018	spp	2012	2018	spp	2012	2018	Spp	2012	2018	spp	2012	2018
katu imbhul	15.4	66.4305	16.8	84.8263	0		indi	1		nelli	4.2		0	21	41	podisingnomaran	10	62	ginigrass	14	5
welan	20.4	143.984	21.6	167.497						nelli		3.3							rila thana	56	5
katu imbhul	10.6	22.9593	11.8	30.982						nelli		1.9							lantana	12	2
ahala	21.3	161.441	22	175.756						nelli		2.4							podisinm	3	0
ahla	12.3	34.8846	13.6	46.5724						nelli		4.6							illuk	7	0
		429.7		505.635						karanda		2.6
										thibbatu		1.8
										hulanhik	4.2
										hulanhik	3.8

## Sheet: Sheet7
12.6m					stump		bush			3m (1.5>5)			3m (30>1.5)			3m (30<)			Inasive spp
tree	DBh (2012)	biomass 2012	dbh (2018)	biomass 2019	2012	2018	spp	2012	2018	spp	2012	2018	spp	2012	2018	Spp	2012	2018	spp	2012	2018
rabar	7.3	10.6773	8.2	12.6043	4	4	0			karada		4.1	gammalu	3	27	thora	14	109	naththasuriya	40	10
rabar	7.4	10.8387	8.6	13.8033						karada		3.4							mana	25	0
rabar	7	10.272	8.3	12.8843						nelli		2.8
rabar	7	10.272	8.2	12.6043						karanda		3.3
rabar	7.2	10.529	8.6	13.8033						nelli		3
rabar	7.5	11.0133	8.4	13.1775						nelli		3.2
rabar	7	10.272	8.3	12.8843						ginisiriya	4.9
rabar	7	10.272	8.2	12.6043						gaduba	4.6
rabar	7	10.272	8.3	12.8843						gaduba	3.8
rabar	7.6	11.2011	8.1	12.3375						hulanhik	4.1
rabar	7	10.272	8.2	12.6043
rabar	8	12.0839	9.2	15.9969
rabar	8.3	12.8843	9	15.213
rabar	8	12.0839	9.2	15.9969
rabar	9	15.213	10.3	21.25
rabar	7	10.272	8.7	14.136
rabar	8	12.0839	9.2	15.9969
		190.512		240.782

## Sheet: Sheet8
12.6m					stump		bush			3m (1.5>5)			3m (30>1.5)			3m (30<)			Inasive spp
tree	DBh (2012)	biomass 2012	dbh (2018)	biomass 2019	2012	2018	spp	2012	2018	spp	2012	2018	spp	2012	2018	Spp	2012	2018	spp	2012	2018
yakinaran	22.2	179.965	23	197.326	6	6	0	0	0	welan	2.5	2.9	gammalu	3	18	hulanthala	16	64	lantana	30	10
burutha	14.3	53.7879	14.8	59.337						welan	1.7	2.2							mana	40	30
burutha	10.7	23.5554	11.4	28.097						nelli	2.4	2.9
damunu	19.6	129.363	20.8	151.611						nelli	1.5	1.8
burutha	13.5	45.5943	14.2	52.7176						nelli		2.6
burutha	18.5	110.635	19.4	125.839						nelli		4.6
kon	5.6	9.94824	6.7	9.98528						kuratiya	4.6
kon	6	9.7773	7.4	10.8387						nelli	4.8
		562.626		635.753

## Sheet: Sheet9
12.6m					stump		bush			3m (1.5>5)			3m (30>1.5)			3m (30<)			Inasive spp
tree	DBh (2012)	biomass 2012	dbh (2018)	Biomass 2019	2012	2018	spp	2012	2018	spp	2012	2018	spp	2012	2018	Spp	2012	2018	spp	2012	2018
damba	28.1	327.822	29.8	378.934	1	1	0			welan	4.3	4.8	welan	7	13	thora	10	56	lantana	10	2
damba	20.2	140.25	22	175.756						mora	2.6	3.9							mana	55	15
damba	21.5	165.465	23.2	201.798						milla	4.9
kithul	13.8	48.5681	15.3	65.2153						gongottu	4.8	0
hampalanda	9.7	18.1871	10.8	24.1647						karawala kebilla	2.4	3.9
damba	27.8	319.197	29.2	360.46						karawaakebia	4.8
damunu	13.2	42.739	14.8	59.337						nelli		2.8
damunu	21.3	161.441	22.8	192.907						nelli		2.6
damunu	20	136.568	21.2	159.449						nelli		2.9
hampalanda	13.5	45.5943	14.8	59.337						nelli		3.2
damunu	24.3	227.336	25.8	264.73
damba		1633.17	5.6	9.94824
				1952.04

## Sheet: Sheet10
12.6m					stump		bush			3m (1.5>5)			3m (30>1.5)			3m (30<)			Inasive spp
tree	DBh (2012)	biomass 2012	dbh (2018)	biomass 2019	2012	2018	spp	2012	2018	spp	2012	2018	spp	2012	2018	Spp	2012	2018	spp	2012	2018
katuimbul	12.5	36.5378	14	50.6165	4		0			gammalu	4		welan	4	12	balunaguta	8	81	lantana	30	0
katuimbul	18.9	117.261	20.2	140.25						welan	3.5	4.8
katuimbul	22.5	186.377	23.8	215.531						hulanhik	3.8
ahala	8.7	14.136	10	19.6593						nelli		4.6
ahala	9.2	15.9969	10.8	24.1647						nelli		3.6
		370.308		450.221						karanda		3
										nelli		3.1
