# Supplementary material for: Impact of community-based forest restoration on stand structural attributes, aboveground biomass and carbon stock compared to state-managed forests in tropical ecosystems of Sri Lanka
Source: PeerJ journal article supplement (doi:10.7717/peerj.18176), 2024-09-26
Supplement: State_and_community_managed_forests_Raw_data.zip [file Hawannarawa State own.xlsx]

## Sheet: Sheet1
12.6m					stump		bush			3m (1.5>5)			3m (30>1.5)			3m (30<)			Inasive spp
tree	DBh (2012)	biomass 2012	dbh (2018)	biomass 2019	2012	2018	spp	2012	2018	spp	2012	2018	spp	2012	2018	Spp	2012	2018	spp	2012	2018
teak	6.8	10.0677	8	12.0839	0		indi	2		nelli	3.2		gammalu	2	4	Bowitiya	8	12	Lantana	8	16
teak	7.2	10.529	8.7	14.136						karanda	2.6								mana	6	18
teak	8.3	12.8843	9.8	18.6647						nelli	2.5								Gini grass	5	9
damunu	10.3	21.25	11.8	30.982						gketakela	3.1
damunu	15.3	65.2153	17.1	89.1041						ginusupu	2.9
ketakala	15.6	68.9004	16.8	84.8263						ginisiriya	1.2
damunu	12.6	37.3842	14	50.6165						gammalu		1.8
damunu	20.1	138.403	21.5	165.465						kobba		1.6
damunu	10.3	21.25	11.8	30.982
damunu	20.3	142.111	21.7	169.542
damunu	12.5	36.5378	13.7	47.5637
nolaba	6.7	9.98528	8.4	13.1775
katakela	7.4	10.8387	8.9	14.8408
katakela	11.3	27.4087	12.6	37.3842
kala	41.3	824.667	41.8	847.998
katakela	26.5	283.194	28	324.934
katakela	32.6	471.417	34	521.53
teak	8.3	12.8843	9.8	18.6647
katakela	11.3	27.4087	12.6	37.3842
nolaba		2232.33	6.4	9.81712
katakela			5.8	9.83642
				2549.53

## Sheet: Sheet2
12.6m					stump		bush			3m (1.5>5)			3m (30>1.5)			3m (30<)			Inasive spp
tree	DBh (2012)	biomass 2012	dbh (2018)	biomass 2019	2012	2018	spp	2012	2018	spp	2012	2018	spp	2012	2018	Spp	2012	2018	spp	2012	2018
teak	16.5	80.667	18.2	105.804	3		0			bolpana	1.5	4.2	bolpana	4	9	bolpana	12	21	0
teak	7.3	10.6773	9.8	18.6647						migonkarapincha	1.1
damunu	11.6	29.5132	13.2	42.739						bolpana	1.1	3.4
teak	15.7	70.1551	17.9	101.091						migonkarapincha	2.6
damunu	16.5	80.667	18.2	105.804						migonkarapincha		1.8
damunu	21.4	163.447	23	197.326						migonkarapincha		2.5
damunu	12.3	34.8846	14.2	52.7176						mora	2.1	4.9
katakela	15.3	65.2153	16.8	84.8263						mora	2.6
damunu	49.3	1237.48	50.8	1324.27
damunu	18.3	107.401	19.8	132.939
damunu	10	19.6593	11.8	30.982
dunumadala	7.6	11.2011	9.2	15.9969
dunumadala	26.5	283.194	27.9	322.059
kala	14.6	57.0778	16.2	76.6263
damunu	22.1	177.854	23.7	213.209
kalumediriya	54.8	1570.2	55.2	1595.95
		3999.29		4421

## Sheet: Sheet3
12.6m					stump		bush			3m (1.5>5)			3m (30>1.5)			3m (30<)			Inasive spp
tree	DBh (2012)	biomass 2012	dbh (2018)	biomass 2019	2012	2018	spp	2012	2018	spp	2012	2018	spp	2012	2018	Spp	2012	2018	spp	2012	2018
damunu	23.1	199.556	24.7	237.018	4	5	0			welan	3.6		welan	6	8	thora	2	5	lantana	5	20
katakela	51	1336.07	51.5	1365.79						welan	3.1	4.6							mana	45	55
damunu	24.6	234.578	25.8	264.73						gammalu	2.6	2.9
milla	51.5	1365.79	52.4	1420.11						gammalu		1.8
thelabo	11.7	30.241	13	40.9014						welan		1.6
damunu	9.4	16.8335	11.2	26.7336
damunu	7.3	10.6773	8.9	14.8408
rukaththan	10.6	22.9593	11.9	31.7362
damunu	11.7	30.241	12.8	39.1164
damunu	52.6	1432.33	53	1456.92
milla	19.3	124.097	20.7	149.685
damunu	11.5	28.7985	12.6	37.3842
thelabo	16	73.9983	17.2	90.5564
		4906.16		5175.52

## Sheet: Sheet4
12.6m					stump		bush			3m (1.5>5)			3m (30>1.5)			3m (30<)			Inasive spp
tree	DBh (2012)	biomass 2012	dbh (2018)	biomass 2019	2012	2018	spp	2012	2018	spp	2012	2018	spp	2012	2018	Spp	2012	2018	spp	2012	2018
gongotu	7.8	11.6161	9.1	15.5984	0		indi	1		0			0			bowitiya	3	3	rila thana	25	40
kohomba	37.6	662.25	38.7	708.652															podisingnomaran	45	30
godakirilla	13	40.9014	14.5	55.968															lantana	10	20
godakirilla	10.5	22.3764	11.8	30.982
katupila	8.3	12.8843	9.8	18.6647
gongotu	8.2	12.6043	9.6	17.7227
kohomba	11.4	28.097	12.6	37.3842
kohomba	10.2	20.7066	12.2	34.0777
kalawel	6.5	9.86	7	10.272
kalawel	7.2	10.529	7.6	11.2011
damunu	11.9	31.7362	13.1	41.8136
gongotu	7.8	11.6161	8.7	14.136
gongotu	10.3	21.25	11.7	30.241
lolu	14.3	53.7879	14.5	55.968
lolu	8.9	14.8408	9.4	16.8335
lolu	9.6	17.7227	10.5	22.3764
lolu	9.7	18.1871	10.6	22.9593
lolu	9.6	17.7227	10.6	22.9593
katekela	23.6	210.901	24.7	237.018
lolu		1229.59	5.6	9.94824
lolu			5.4	10.1127
				1424.89

## Sheet: Sheet5
12.6m					stump		bush			3m (1.5>5)			3m (30>1.5)			3m (30<)			Inasive spp
tree	DBh (2012)	biomass	dbh (2018)	biomass 2019	2012	2018	spp	2012	2018	spp	2012	2018	spp	2012	2018	Spp	2012	2018	spp	2012	2018
suriyamara	31.5	433.853	32.7	474.911	4	4	0			gongotu	1.1		migonkarapincha	12	23	migonkarapincha	28	49	hawarinuga	0.5	1
mora	21.3	161.441	22.8	192.907						gongotu	1.8
yakada maran	11.6	29.5132	12.7	38.2437						bolpana	0.7
yakada maran	18.7	113.921	0							yakinaran	1.5
nolaba	8.4	13.1775	10.1	20.1764						migonkarapincha		1.9
dik anda	8.6	13.8033	10	19.6593						migonkarapincha		2.3
kaluwara	56.4	1674.47	56.9	1707.74						bolpana		1.6
kaluwella	38.3	691.594	38.8	712.95
mora	8.4	13.1775	9.7	18.1871
lingu	27.5	310.691	30.1	388.349
nuga	24.6	234.578	26.2	275.202
nuga	25.3	251.936	27	296.778
hama	21.3	161.441	23	197.326
dik anda	5.4	10.1127	0
kanda	13.2	42.739	14.7	58.2008
hama	8.4	13.1775	0	0
bala	10.4	21.8066	11.6	29.5132
bala	13.4	44.6294	14.5	55.968
nolaba	7.5	11.0133	9.2	15.9969
galkera	16.7	83.4267	18	102.649
galkera	14.5	55.968	15.8	71.423
weera	23.5	208.605	23.9	217.866
ulkenda	6.7	9.98528	8.1	12.3375
mora	5.6	9.94824	6.8	10.0677
kalumadiriya	37.5	658.11	38.2	687.363
galkera	8.7	14.136	10.2	20.7066
kanda	8.3	12.8843	9.8	18.6647
nolaba	12.6	37.3842	13.8	48.5681
ulkenda	10.6	22.9593	11.9	31.7362
dik anda	12.5	36.5378	13.7	47.5637
kanda	12.7	38.2437	14.2	52.7176
dik anda	11.4	28.097	13	40.9014
dik anda	7.6	11.2011	8.7	14.136
kalumadiriya	37.6	662.25	38.7	708.652
mora	6.8	10.0677	8.2	12.6043
ulkenda	10.5	22.3764	12	32.5035
		6169.25		6632.57

## Sheet: Sheet6
12.6m					stump		bush			3m (1.5>5)			3m (30>1.5)			3m (30<)			Inasive spp
tree	DBh (2012)	Biomass 2012	dbh (2018)	biomass 2019	2012	2018	spp	2012	2018	spp	2012	2018	spp	2012	2018	Spp	2012	2018	spp	2012	2018
nolaba	7.4	10.8387	8.9	14.8408	0		0			gongotu	1.1	3.2	gongotu	1		3			katakalu	2	7
nolaba	31.3	427.194	32.8	478.418						gongotu	1	2.8							gall	1	5
nolaba	8.3	12.8843	9.7	18.1871						gongotu	1.1	2.9
nolaba	8.7	14.136	10	19.6593						gongotu	1.1	2.9
galkera	7.2	10.529	8.4	13.1775
mora	41.6	838.626	42.5	881.215
bala	9.6	17.7227	11	25.4228
bala	18.3	107.401	19.8	132.939
ulkenda	6.2	9.77086	7.5	11.0133
ulkenda	10.4	21.8066	11.7	30.241
bala	39.6	747.803	40.3	778.992
galsiyabala	11.4	28.097	12.5	36.5378
kaluwara	5.8	9.83642	7	10.272
galkera	6.5	9.86	7.7	11.402
bala	13.5	45.5943	15.3	65.2153
bala	15.6	68.9004	16.4	79.3069
bala	5.8	9.83642	7	10.272
bala	6.5	9.86	7.6	11.2011
welan	26.7	288.588	28	324.934
dik anda	7.6	11.2011	9.2	15.9969
dik anda	8	12.0839	9.3	16.4086
dik anda	5.7	9.88574	7	10.272
welan	9.4	16.8335	10.8	24.1647
welan	8.3	12.8843	9.7	18.1871
nolaba	8.7	14.136	10	19.6593
welan	12.2	34.0777	13.8	48.5681
kaluwara	33	485.471	34.2	528.9
bala	6.1	9.7675	7.8	11.6161
welan	6.5	9.86	8	12.0839
badulla	6.3	9.7874	7.9	11.8434
nolaba	10.2	20.7066	12	32.5035
nolaba	12.1	33.284	14	50.6165
nolaba	5.4	10.1127	7.1	10.3939
nolaba	5.7	9.88574	7.3	10.6773
yakadamaran	6.3	9.7874	8	12.0839
yakadamaran	5.8	9.83642	7	10.272
bala	7.6	11.2011	8.9	14.8408
nolaba	11.4	28.097	13.2	42.739
welan	10.2	20.7066	11.6	29.5132
		3468.89		3884.59

## Sheet: Sheet7
12.6m					stump		bush			3m (1.5>5)			3m (30>1.5)			3m (30<)			Inasive spp
tree	DBh (2012)	biomass 2012	dbh (2018)	biomass 2019	2012	2018	spp	2012	2018	spp	2012	2018	spp	2012	2018	Spp	2012	2018	spp	2012	2018
bala	22.3	182.089	24.2	224.949	0		0			thamiliya	4.6		dimbi biju	5	8	dimbi biju	3	12	ginigrass	2	8
ganapana	35.3	570.377	36.8	629.503						thamiliya	1.5	2.7							katakalu	4	10
bala	7.2	10.529	9	15.213						thamiliya	3.4	4.1							mist	1	6
weera	46.5	1083.41	47	1110.16						kududaula	3.1	4
abatilla	5.4	10.1127	0	0						thamiliya	3.4	3.8
bala	7.3	10.6773	8.8	14.4818						migonkarapincha	2.9	3.7
bala	11.4	28.097	12.7	38.2437						wellangiriya	2.3	0
welan	14.3	53.7879	16.2	76.6263						thamiliya	1.7	0
mora	10.6	22.9593	12.5	36.5378
malaba	36.7	625.469	38	678.939
damunu	44.7	989.813	45.3	1020.54
atteriya	16.2	76.6263	17.6	96.4973
nolaba	5.8	9.83642	7	10.272
nalaba	13.4	44.6294	14.8	59.337
kalumadiriya	41.7	843.305	42.8	895.648
bala	13.2	42.739	14.5	55.968
mora	5.8	9.83642	0	0
mola	7.2	10.529	9.3	16.4086
bala	20.3	142.111	22	175.756
weera	46.4	1078.1	48.3	1181.27
molaba	13.2	42.739	14.9	60.4863
mora	9.3	16.4086	11	25.4228
bala	16.4	79.3069	17.8	99.5467
damunu	22	175.756	23.9	217.866
damunu		6159.24	5.6	9.94824
bala			5.3	10.2147
				6759.84

## Sheet: Sheet8
12.6m					stump		bush			3m (1.5>5)			3m (30>1.5)			3m (30<)			Inasive spp
tree	DBh (2012)	biomass 2012	dbh (2018)	biomass 2019	2012	2018	spp	2012	2018	spp	2012	2018	spp	2012	2018	Spp	2012	2018	spp	2012	2018
damunu	11.3	27.4087	0		3		0			kudu daula	3.8		kududaula	1	4	nolaba	3	5	mana	5	15
damunu	26.4	280.517	28	324.934						kudu daula	4.1
yakinaran	20.6	147.772	22.3	182.089						welan	3.2	4.8
damunu	47.5	1137.25	48.8	1209.21						welan		1.8
burutha	9.7	18.1871	11.6	29.5132
ahala	12.4	35.7046	14	50.6165
katuimbul	21.2	159.449	22.8	192.907
kon	56.4	1674.47	57.6	1754.88
kon	5.7	9.88574	7.2	10.529
welan	10.4	21.8066	0
welan	5.6	9.94824	7	10.272
burutha	12.3	34.8846	13.8	48.5681
burutha	8.3	12.8843	10	19.6593
burutha	14.5	55.968	0
hampalada	14.5	55.968	15.7	70.1551
damba	57.4	1741.35	58.1	1788.95
damba	20	136.568	21.8	171.601
damunu	24.3	227.336	26.1	272.564
damunu		5787.35	5.4	10.1127
kon			6	9.7773
milla			5.1	10.4583
				6166.8

## Sheet: Sheet9
12.6m					stump		bush			3m (1.5>5)			3m (30>1.5)			3m (30<)			Inasive spp
tree	DBh (2012)	Biomass 2012	dbh (2018)	biomass 2019	2012	2018	spp	2012	2018	spp	2012	2018	spp	2012	2018	Spp	2012	2018	spp	2012	2018
damba	24.6	234.578	26.1	272.564	0	2	0			welan	2.6		yakinaran	5	9	yakinaran	10	10	lantana	20	30
kalawel	6.4	9.81712	7.9	11.8434						kon	2.2	3.3
kalawel	5.7	9.88574	8	12.0839						kon	2.2	3.1
kalawel	7	10.272	8.2	12.6043						tharana	1.6	2.1
nitol	20.3	142.111	20.8	151.611						tharana	1.2	2
ahala	17.3	92.0219	18.7	113.921						yakinaran	1.6	2
welan	7.7	11.402	9.2	15.9969						tharana	2.1	2.8
welan	7	10.272	8.7	14.136						yakinaran		4.1
welan	28	324.934	29.2	360.46						yakinaran		1.6
nitol	14.5	55.968	16.3	77.96
damba	12.6	37.3842	14.2	52.7176
bhukenda	12.4	35.7046	14.8	59.337
puswel	8.9	14.8408	9.5	17.2715
ahala	11	25.4228	12.8	39.1164
hampalanda	21.3	161.441	23	197.326
kalawel	8.3	12.8843	8.9	14.8408
yakinaran	5.6	9.94824	6.4	9.81712
yakinaran	5.8	9.83642	6.5	9.86
dunumadala	35.8	589.756	36.4	613.447
kalumediriya	16.4	79.3069	18	102.649
dunumadala	12	32.5035	14.6	57.0778
puswel	9.4	16.8335	9.9	19.1554
puswel	8	12.0839	8.6	13.8033
kalawel	6.1	9.7675	6.6	9.91606
kalawel	7.6	11.2011	8	12.0839
welan	13.8	48.5681	15.1	62.8245
welan	28.5	339.506	29.2	360.46
welan	11.8	30.982	13.1	41.8136
welan	15	61.6488	17.2	90.5564
welan	36.5	617.441	37.4	653.984
welan	5	10.5998	6.3	9.7874
kalawel	5.2	10.3299	5.6	9.94824
kalawel	6	9.7773	6.5	9.86
rukaththana	26.8	291.305	28	324.934
welan		3380.33	5.6	9.94824
yakinaran			5.1	10.4583
welan			5.3	10.2147
				3866.39

## Sheet: Sheet10
12.6m					stump		bush			3m (1.5>5)			3m (30>1.5)			3m (30<)			Inasive spp
tree	DBh (2012)	biomass 2012	dbh (2018)	biomass 2019	2012	2018	spp	2012	2018	spp	2012	2018	spp	2012	2018	Spp	2012	2018	spp	2012	2018
welan	7.6	11.2011	9	15.213	4	4	0			kudu daula	2.4	3.1	kududaula	4	6	monarakudumbiya	78	62	podisinghomaran	3	10
milla	8.3	12.8843	9.7	18.1871						burulla	1.5	2.1							katakalu	1	8
mora	32.3	461.014	33.4	499.737						bombu	1.8	2.3
eraminiya	5.3	10.2147	5.7	9.88574						kudu daula	4.6
kolon	50.9	1330.16	51.4	1359.82						milla	3.3	3.9
kolon	7.4	10.8387	8.9	14.8408						bolpana		1.8
welan	7.9	11.8434	9.2	15.9969						bala		2.1
welan	6.4	9.81712	8	12.0839
welan	6.6	9.91606	8.1	12.3375
halmilla	41.4	829.306	41.9	852.704
katakal	20.3	142.111	21.8	171.601
welan	11	25.4228	12.6	37.3842
ruk aththana13.2	13.2	42.739	14.5	55.968
godakirilla	11.4	28.097	12.9	40.0023
damunu	21.8	171.601	23.2	201.798
godakirilla	32	450.729	33.5	503.336
godakirilla		3557.9	5.7	9.88574
katupila			5.2	10.3299
welan			5.2	10.3299
				3851.44
