# Supplementary material for: Impact of community-based forest restoration on stand structural attributes, aboveground biomass and carbon stock compared to state-managed forests in tropical ecosystems of Sri Lanka
Source: PeerJ journal article supplement (doi:10.7717/peerj.18176), 2024-09-26
Supplement: State_and_community_managed_forests_Raw_data.zip [file Kiniyarawa community own(1).xlsx]

## Sheet: Sheet1
12.6m					stump		bush			3m (1.5>5)			3m (30>1.5)			3m (30<)			Inasive spp
tree	DBh (2012)	biomass 2012	dbh (2018)	Biomass 2019	2012	2018	spp	2012	2018	spp	2012	2018	spp	2012	2018	Spp	2012	2018	spp	2012	2018
damba	5.7	9.88574	7.1	10.3939	0		indi	2		nelli	3.2		gammalu	2	4	Bowitiya	8	12	Lantana	8	16
damunu	16.5	80.667	17.9	101.091						karanda	2.6								mana	6	18
damunu	8.8	14.4818	9.7	18.1871						nelli	2.5								Gini grass	5	9
damunu	7.3	10.6773	8.9	14.8408						gketakela	3.1
damunu	5.7	9.88574	7	10.272						ginusupu	2.9
wa	16.8	84.8263	18	102.649						ginisiriya	1.2
wa	8.7	14.136	10.2	20.7066						gammalu		1.8
kala	24.3	227.336	25.4	254.468						kobba		1.6
kala	24.7	237.018	26	269.939
kaha penela	5.3	10.2147	6.9	10.1633
kahata	5.7	9.88574	7	10.272
damunu		709.015	5.6	9.94824
damunu			5.8	9.83642
				842.768

## Sheet: Sheet2
12.6m					stump		bush			3m (1.5>5)			3m (30>1.5)			3m (30<)			Inasive spp
tree	DBh (2012)	biomass 2012	dbh (2018)	biomass 2019	2012	2018	spp	2012	2018	spp	2012	2018	spp	2012	2018	Spp	2012	2018	spp	2012	2018
aththikka	67.6	2498.78	68.3	2555.78	3		0			bolpana	1.5	4.2	bolpana	4	9	bolpana	12	21	0
damunu	27.9	322.059	30	385.197						migonkarapincha	1.1
kahata	17.2	90.5564	17.8	99.5467						bolpana	1.1	3.4
madu	26.4	280.517	26.8	291.305						migonkarapincha	2.6
damunu	6.3	9.7874	7.9	11.8434						migonkarapincha		1.8
damunu	5.8	9.83642	7	10.272						migonkarapincha		2.5
kala	19.8	132.939	20.7	149.685						mora	2.1	4.9
burutha	19.7	131.145	20.5	145.871						mora	2.6
burutha	15.8	71.423	16.7	83.4267
kahata	16.8	84.8263	17.5	94.9923
damunu	6.2	9.77086	7.9	11.8434
damunu	5.3	10.2147	6.6	9.91606
kuratiya	6.7	9.98528	7.4	10.8387
kuratiya	5.4	10.1127	6	9.7773
damunu		3671.95	5.4	10.1127
kuratiya			5.2	10.3299
damunu			5	10.5998
				3901.34

## Sheet: Sheet3
12.6m					stump		bush			3m (1.5>5)			3m (30>1.5)			3m (30<)			Inasive spp
tree	DBh (2012)	biomass 2012	dbh (2018)	biomass 2019	2012	2018	spp	2012	2018	spp	2012	2018	spp	2012	2018	Spp	2012	2018	spp	2012	2018
nelli	27.5	310.691	25	244.418	4	5	0			welan	3.6		welan	6	8	thora	2	5	lantana	5	20
nelli	18.4	109.011	18.9	117.261						welan	3.1	4.6							mana	45	55
seru	10.5	22.3764	11.7	30.241						gammalu	2.6	2.9
welan	8.5	13.4838	9.8	18.6647						gammalu		1.8
seru	8.3	12.8843	9.6	17.7227						welan		1.6
seru	5.8	9.83642	7.1	10.3939
eraminiya	5.4	10.1127	5.8	9.83642
puwakgediya wel	8.3	12.8843	9.7	18.1871
puwakgediya wel	12.9	40.0023	14.7	58.2008
ketakela	30.6	404.304	31.5	433.853
dambu	14.3	53.7879	15.5	67.6589
ginisiriya	8.7	14.136	10.4	21.8066
ginisiriya	12.5	36.5378	13.9	49.5857
karanda	17.4	93.5005	18.1	104.22
nelli	9.4	16.8335	10.8	24.1647
karanda	8.6	13.8033	9.8	18.6647
karanda	7.4	10.8387	8.7	14.136
eraminiya	5.7	9.88574	6.2	9.77086
welan	14.2	52.7176	15.4	66.4305
welan	9.7	18.1871	11	25.4228
welan	6.5	9.86	7.7	11.402
welan		1275.67	5.4	10.1127
welan			5	10.5998
				1392.75

## Sheet: Sheet4
12.6m					stump		bush			3m (1.5>5)			3m (30>1.5)			3m (30<)			Inasive spp
tree	DBh (2012)	biomass 2012	dbh (2018)	biomass 2019	2012	2018	spp	2012	2018	spp	2012	2018	spp	2012	2018	Spp	2012	2018	spp	2012	2018
karanda	9.7	18.1871	10.6	22.9593	0		indi	1		0			0			bowitiya	3	3	rila thana	25	40
kappetiya	8.6	13.8033	9.3	16.4086															podisingnomaran	45	30
karaw	15.2	64.0133	16.5	80.667															lantana	10	20
mi	12.8	39.1164	13.8	48.5681
karanda	9.7	18.1871	10.5	22.3764
kon	8.5	13.4838	9.7	18.1871
milla	56.4	1674.47	57	1714.44
milla	16.7	83.4267	17.9	101.091
bambarawel	10.8	24.1647	11.5	28.7985
bambarawel	5.7	9.88574	6.4	9.81712
kuratiya	6.4	9.81712	7.2	10.529
kamburu wel	5.2	10.3299	5.8	9.83642
kamburu wel	5.7	9.88574	6.4	9.81712
lihiniya	6.5	9.86	7.3	10.6773
kon	18.6	112.271	19.8	132.939
kon	21.7	169.542	22.9	195.11
bambarawel	5.1	10.4583	5.6	9.94824
		2290.9		2442.17

## Sheet: Sheet5
12.6m					stump		bush			3m (1.5>5)			3m (30>1.5)			3m (30<)			Inasive spp
tree	DBh (2012)	biomass 2012	dbh (2018)	biomass 2019	2012	2018	spp	2012	2018	spp	2012	2018	spp	2012	2018	Spp	2012	2018	spp	2012	2018
kumbuk	28.5	339.506	29.3	363.506	4	4	0			gongotu	1.1		migonkarapincha	12	23	migonkarapincha	28	49	hawarinuga	0.5	1
karada	16.3	77.96	16.8	84.8263						gongotu	1.8
yakada maran	15.3	65.2153	15.9	72.7041						bolpana	0.7
karada	27.5	310.691	28	324.934						yakinaran	1.5
karada	15.4	66.4305	16	73.9983						migonkarapincha		1.9
yakada maran	32.4	464.468	32.8	478.418						migonkarapincha		2.3
yakada maran	26.5	283.194	27	296.778						bolpana		1.6
yakada maran	27.8	319.197	28.3	333.638
wellangiriya	13.4	44.6294	13.9	49.5857
wellangiriya	9.6	17.7227	10.2	20.7066
kumbuk	7.6	11.2011	8.8	14.4818
kumbuk	69.8	2680.11	70.3	2722.21
karada	42.6	886.013	43	905.336
karada	15.6	68.9004	16.1	75.3057
milla	53.6	1494.21	54.2	1531.96
kumbuk	27.6	313.513	28.2	330.723
karada	13.6	46.5724	14.4	54.8714
kumbuk	33.2	492.578	34	521.53
kumbuk	19.7	131.145	20.6	147.772
mi	75.9	3216.25	76.3	3253.12
wellangiriya	5.7	9.88574	6.2	9.77086
mi		11339.4	5.3	10.2147
				11676.4

## Sheet: Sheet6
12.6m					stump		bush			3m (1.5>5)			3m (30>1.5)			3m (30<)			Inasive spp
tree	DBh (2012)	biomasss 2012	dbh (2018)	biomass 2012	2012	2018	spp	2012	2018	spp	2012	2018	spp	2012	2018	Spp	2012	2018	spp	2012	2018
karaw	11.6	29.5132	12.5	36.5378	0		0			gongotu	1.1	3.2	gongotu	1		3			katakalu	2	7
divul	9.8	18.6647	10.5	22.3764						gongotu	1	2.8							gall	1	5
ahala	14.3	53.7879	15.7	70.1551						gongotu	1.1	2.9
wa	19.3	124.097	20.5	145.871						gongotu	1.1	2.9
wa	12.7	38.2437	13.8	48.5681
bulu	25.2	249.417	25.8	264.73
suriyamara	26	269.939	26.9	294.035
eraminiya	6	9.7773	6.7	9.98528
eraminiya	8	12.0839	8.5	13.4838
eraminiya	6.2	9.77086	6.7	9.98528
nitol	6.5	9.86	7.1	10.3939
demata	7.4	10.8387	8.6	13.8033
damunu	25.3	251.936	26.8	291.305
nolaba	5.6	9.94824	6.7	9.98528
nitol	7.6	11.2011	8.8	14.4818
suriyamara	13.8	48.5681	15	61.6488
bambarawel	6.7	9.98528	7.4	10.8387
bambarawel	8.4	13.1775	9	15.213
bambarawel	6.8	10.0677	7.2	10.529
		1190.88		1353.93

## Sheet: Sheet7
12.6m					stump		bush			3m (1.5>5)			3m (30>1.5)			3m (30<)			Inasive spp
tree	DBh (2012)	Biomass 2012	dbh (2018)	biomass 2019	2012	2018	spp	2012	2018	spp	2012	2018	spp	2012	2018	Spp	2012	2018	spp	2012	2018
seru	7.6	11.2011	8.8	14.4818	0		0			thamiliya	4.6		dimbi biju	5	8	dimbi biju	3	12	ginigrass	2	8
seru	5.7	9.88574	6.8	10.0677						thamiliya	1.5	2.7							katakalu	4	10
welan	39.4	739.011	40.2	774.497						thamiliya	3.4	4.1							mist	1	6
welan	13.2	42.739	14	50.6165						kududaula	3.1	4
welan	11.6	29.5132	12.7	38.2437						thamiliya	3.4	3.8
welan	6.4	9.81712	7.8	11.6161						migonkarapincha	2.9	3.7
welan		842.167	5.2	10.3299						wellangiriya	2.3	0
welan			5.6	9.94824						thamiliya	1.7	0
damunu			5.3	10.2147
damunu			5	10.5998
				940.615

## Sheet: Sheet8
12.6m					stump		bush			3m (1.5>5)			3m (30>1.5)			3m (30<)			Inasive spp
tree	DBh (2012)	biomass 2012	dbh (2018)	biomass 2019	2012	2018	spp	2012	2018	spp	2012	2018	spp	2012	2018	Spp	2012	2018	spp	2012	2018
welan	5.1	10.4583	5.9	9.80028	3		0			kudu daula	3.8		kududaula	1	4	nolaba	3	5	mana	5	15
bulu	69.8	2680.11	70.3	2722.21						kudu daula	4.1
bulu	5	10.5998	6.2	9.77086						welan	3.2	4.8
ahala	5.2	10.3299	6.9	10.1633						welan		1.8
damunu	5.7	9.88574	7.1	10.3939
damunu	6.8	10.0677	8	12.0839
wa	12.7	38.2437	13.8	48.5681
kahata	5	10.5998	5.8	9.83642
nelli	7.8	11.6161	8.7	14.136
nelli	5	10.5998	6.2	9.77086
nelli	5.1	10.4583	6.2	9.77086
nelli	9.3	16.4086	10.2	20.7066
bulu	27.8	319.197	28.6	342.46
seru	5.7	9.88574	7	10.272
seru	6.5	9.86	7.9	11.8434
damunu	9.3	16.4086	10.5	22.3764
		3184.73		3274.17

## Sheet: Sheet9
12.6m					stump		bush			3m (1.5>5)			3m (30>1.5)			3m (30<)			Inasive spp
tree	DBh (2012)	biomass 2012	dbh (2018)	biomass 2019	2012	2018	spp	2012	2018	spp	2012	2018	spp	2012	2018	Spp	2012	2018	spp	2012	2018
lihiniya	5.7	9.88574	6.5	9.86	0	2	0			welan	2.6		yakinaran	5	9	yakinaran	10	10	lantana	20	30
karaw	32.1	454.144	33	485.471						kon	2.2	3.3
wel kaliya	10.8	24.1647	11.4	28.097						kon	2.2	3.1
nolaba	6.8	10.0677	8.2	12.6043						tharana	1.6	2.1
makulla	27.6	313.513	28.9	351.4						tharana	1.2	2
makulla	9.7	18.1871	11.2	26.7336						yakinaran	1.6	2
bala	8.9	14.8408	10.3	21.25						tharana	2.1	2.8
bala	16.4	79.3069	17.8	99.5467						yakinaran		4.1
mora	36.7	625.469	37.6	662.25						yakinaran		1.6
katakela	21.2	159.449	22.6	188.54
damunu	7.6	11.2011	9	15.213
		1720.23		1900.97

## Sheet: Sheet10
12.6m					stump		bush			3m (1.5>5)			3m (30>1.5)			3m (30<)			Inasive spp
tree	DBh (2012)	biomass 2012	dbh (2018)	biomass 2019	2012	2018	spp	2012	2018	spp	2012	2018	spp	2012	2018	Spp	2012	2018	spp	2012	2018
kudu daula	37	637.611	37.8	670.568	4	4	0			kudu daula	2.4	3.1	kududaula	4	6	monarakudumbiya	78	62	podisinghomaran	3	10
milla	16.3	77.96	17.1	89.1041						burulla	1.5	2.1							katakalu	1	8
milla	11	25.4228	12.3	34.8846						bombu	1.8	2.3
kudu daula	7.8	11.6161	9.2	15.9969						kudu daula	4.6
gal siyabala	46.9	1104.79	47.8	1153.66						milla	3.3	3.9
damunu	5.6	9.94824	7.3	10.6773						bolpana		1.8
liiya	5.4	10.1127	5.8	9.83642						bala		2.1
liniya	5	10.5998	5.6	9.94824
kudu daula	6.4	9.81712	7.9	11.8434
bhukenda	14.6	57.0778	15.4	66.4305
kalawel	5.2	10.3299	5.6	9.94824
kalawel	5.6	9.94824	6	9.7773
kon	12.3	34.8846	13.8	48.5681
eraminiya	5.3	10.2147	5.6	9.94824
karakola	5.3	10.2147	5.7	9.88574
damunu	6.4	9.81712	7.8	11.6161
damunu		2040.36	5.6	9.94824
welan			5.1	10.4583
kon			5	10.5998
kon			5.4	10.1127
kon			5	10.5998
				2224.41
