# Supplementary material for: Impact of community-based forest restoration on stand structural attributes, aboveground biomass and carbon stock compared to state-managed forests in tropical ecosystems of Sri Lanka
Source: PeerJ journal article supplement (doi:10.7717/peerj.18176), 2024-09-26
Supplement: State_and_community_managed_forests_Raw_data.zip [file kiniyarawa State own.xlsx]

## Sheet: Sheet1
12.6m					stump		bush			3m (1.5>5)			3m (30>1.5)			3m (30<)			Inasive spp
tree	DBh (2012)	biomass 2012	dbh (2018)	biomass 2018	2012	2018	spp	2012	2018	spp	2012	2018	spp	2012	2018	Spp	2012	2018	spp	2012	2018
welan	27.5	310.691	0		0		indi	2		nelli	3.2		gammalu	2	4	Bowitiya	8	12	Lantana	8	16
welan	21.3	161.441	22.7	190.717						karanda	2.6								mana	6	18
damunu	45.4	1025.7	46.1	1062.24						nelli	2.5								Gini grass	5	9
mora	21.3	161.441	22.6	188.54						gketakela	3.1
mora	20.7	149.685	21.9	173.672						ginusupu	2.9
mora	16.5	80.667	17.7	98.0154						ginisiriya	1.2
welan	18.7	113.921	19.7	131.145						gammalu		1.8
makulla	23.8	215.531	25	244.418						kobba		1.6
ahala	14.6	57.0778	15.7	70.1551
bala	9.3	16.4086	10.6	22.9593
bala	35	558.907	37.3	649.871
welan	28.6	342.46	29.7	375.822
kaluwara	16.2	76.6263	17.3	92.0219
mora	23.7	213.209	24.5	232.151
wel keliya	6.8	10.0677	7.7	11.402
welan	28.7	345.427	29.8	378.934
kanda	51.7	1377.77	52.4	1420.11
gongotu	11.8	30.982	12.5	36.5378
mora	23.3	204.054	24.2	224.949
mora	13.6	46.5724	14.8	59.337
gongotu	17.3	92.0219	18	102.649
milla	19.7	131.145	20.8	151.611
welan	32.9	481.938	33.8	514.213
kon	29.7	375.822	30.8	410.778
karakola	9.8	18.6647	10.5	22.3764
welan	38.3	691.594	38.9	717.26
nolaba	5.6	9.94824	6.4	9.81712
nolaba	8.7	14.136	9.8	18.6647
welan	21.7	169.542	22.8	192.907
dunumadala	16.5	80.667	17.7	98.0154
		7564.12		7901.29

## Sheet: Sheet2
12.6m					stump		bush			3m (1.5>5)			3m (30>1.5)			3m (30<)			Inasive spp
tree	DBh (2012)	biomass 2012	dbh (2018)	biomass 2019	2012	2018	spp	2012	2018	spp	2012	2018	spp	2012	2018	Spp	2012	2018	spp	2012	2018
bala	16.8	84.8263	17.9	101.091	3		0			bolpana	1.5	4.2	bolpana	4	9	bolpana	12	21	0
welan	6.5	9.86	7.8	11.6161						migonkarapincha	1.1
welan	5.3	10.2147	6.4	9.81712						bolpana	1.1	3.4
bala	23.7	213.209	24.8	239.472						migonkarapincha	2.6
nelli	16.7	83.4267	17.8	99.5467						migonkarapincha		1.8
kala wel	5.4	10.1127	5.8	9.83642						migonkarapincha		2.5
damba	32.5	467.936	33.7	510.574						mora	2.1	4.9
halmilla	6.7	9.98528	7.9	11.8434						mora	2.6
halmilla	5	10.5998	6.4	9.81712
bala	5.4	10.1127	6.7	9.98528
welan	18.6	112.271	19.7	131.145
naloba	5.3	10.2147	6.8	10.0677
welan	46.7	1094.07	47.6	1142.71
bala	24.7	237.018	25.6	259.573
nolaba	8.7	14.136	9.5	17.2715
karawalakebbilla	24.7	237.018	25.6	259.573
kala wel	6.4	9.81712	6.9	10.1633
kala wel	5.8	9.83642	6.3	9.7874
kaluwara	42.4	876.43	42.9	900.486
mora	5.7	9.88574	6.6	9.91606
wal waraka	12.8	39.1164	13.9	49.5857
bala	6.7	9.98528	7.9	11.8434
bala	6.3	9.7874	7.7	11.402
kon	5.6	9.94824	6.8	10.0677
kurataiya	11.6	29.5132	12.3	34.8846
gal karanda	12	32.5035	12.6	37.3842
raana	26.8	291.305	27.5	310.691
bala	23.6	210.901	24.3	227.336
		4154.04		4457.48

## Sheet: Sheet3
12.6m					stump		bush			3m (1.5>5)			3m (30>1.5)			3m (30<)			Inasive spp
tree	DBh (2012)	biomass 2012	dbh (2018)	biomass 2019	2012	2018	spp	2012	2018	spp	2012	2018	spp	2012	2018	Spp	2012	2018	spp	2012	2018
damunu	12.4	35.7046	13.6	46.5724	4	5	0			welan	3.6		welan	6	8	thora	2	5	lantana	5	20
penela	8.2	12.6043	9.4	16.8335						welan	3.1	4.6							mana	45	55
gongotu	6.7	9.98528	7.9	11.8434						gammalu	2.6	2.9
ankenda	5	10.5998	6.3	9.7874						gammalu		1.8
damunu	23.5	208.605	24.7	237.018						welan		1.6
ankenda	10.8	24.1647	12	32.5035
burulu	7.6	11.2011	8.7	14.136
burulu	8.2	12.6043	9.6	17.7227
burulu	5.3	10.2147	6.5	9.86
kalumadiriya	5.3	10.2147	6.7	9.98528
kuratiya	5	10.5998	5.8	9.83642
katupila	5	10.5998	5.5	10.0239
kukuruman	5.2	10.3299	6.1	9.7675
gongotu	5.1	10.4583	5.9	9.80028
burulu	12.6	37.3842	13.5	45.5943
buruth	12.6	37.3842	13.4	44.6294
buruth	15	61.6488	15.8	71.423
buruth	16.6	82.0403	17.5	94.9923
buruth	6.7	9.98528	7.4	10.8387
buruth	5.6	9.94824	6.8	10.0677
eraminiya	8.7	14.136	9.2	15.9969
eraminiya	5.6	9.94824	6	9.7773
eraminiya	5	10.5998	5.4	10.1127
buruth	7.2	10.529	8.4	13.1775
raana	7.6	11.2011	8.7	14.136
raana	6.3	9.7874	7.6	11.2011
raana	9.3	16.4086	10.5	22.3764
hulan hik	9.3	16.4086	10.6	22.9593
seru	8.7	14.136	9.5	17.2715
nolaba	5.6	9.94824	6.8	10.0677
kukuruman	5	10.5998	5.9	9.80028
kukuruman	6.5	9.86	7.4	10.8387
kuratiya	6	9.7773	6.6	9.91606
milll	12.5	36.5378	13.7	47.5637
milll	10.4	21.8066	11.6	29.5132
suriyamara	9.7	18.1871	10.4	21.8066
eraminiya	5	10.5998	5.4	10.1127
katakela	9.4	16.8335	10.6	22.9593
damunu	6.6	9.91606	7.9	11.8434
kuratiya	5.7	9.88574	6.5	9.86
kuratiya	5.2	10.3299	5.9	9.80028
ankenda	5	10.5998	6.8	10.0677
kaha penela	6.7	9.98528	7.9	11.8434
damunu	5	10.5998	6.8	10.0677
karapincha	7.6	11.2011	8.9	14.8408
milll	6.4	9.81712	7.8	11.6161
damunu	20.7	149.685	21.9	173.672
damunu	30.7	407.534	31.8	443.939
dunumadala	10.9	24.7872	11.7	30.241
milll	9.7	18.1871	11	25.4228
dunumadala	9.3	16.4086	10.5	22.3764
dunumadala	10.7	23.5554	11.6	29.5132
		1606.07		1847.93

## Sheet: Sheet4
12.6m					stump		bush			3m (1.5>5)			3m (30>1.5)			3m (30<)			Inasive spp
tree	DBh (2012)	biomass 2012	dbh (2018)	biomass 2019	2012	2018	spp	2012	2018	spp	2012	2018	spp	2012	2018	Spp	2012	2018	spp	2012	2018
pethan	5.1	10.4583	6.2	9.77086	0		indi	1		0			0			bowitiya	3	3	rila thana	25	40
pethan	5	10.5998	6.2	9.77086															podisingnomaran	45	30
pethan	5	10.5998	6.1	9.7675															lantana	10	20
pethan	7.4	10.8387	8.5	13.4838
wal midi	5.1	10.4583	5.7	9.88574
pethan	5.4	10.1127	6.6	9.91606
hik	36.4	613.447	37.3	649.871
dawul kirala	18.7	113.921	19.4	125.839
pethan	8.7	14.136	9.9	19.1554
pethan	10.2	20.7066	11.4	28.097
thelabu	12.4	35.7046	13.5	45.5943
maha thambala	7.8	11.6161	8.7	14.136
maha thambala	6.7	9.98528	7.8	11.6161
dala kirala	10.6	22.9593	11.7	30.241
pethan	7.4	10.8387	8.6	13.8033
pethan	5.6	9.94824	6.6	9.91606
yara wel	7.6	11.2011	8.1	12.3375
yara wel	8.4	13.1775	8.8	14.4818
gongotu	5.7	9.88574	6.6	9.91606
pethan	5.7	9.88574	6.8	10.0677
pethan	5.6	9.94824	6.7	9.98528
hama	40.7	797.104	41.6	838.626
pethan	11.6	29.5132	12.7	38.2437
yara wel	9.4	16.8335	9.9	19.1554
pethan	7.4	10.8387	8.6	13.8033
pethan	5.3	10.2147	6.6	9.91606
pethan	9.6	17.7227	10.7	23.5554
karakola	10.6	22.9593	11	25.4228
pethan	11	25.4228	12.1	33.284
weera	45	1005.12	45.5	1030.88
pethan	7.6	11.2011	8.7	14.136
gongotu	5.6	9.94824	6.7	9.98528
hik	33	485.471	33.6	506.949
hik	38.8	712.95	39.7	752.219
pethan	9.7	18.1871	10.8	24.1647
pethan	10.2	20.7066	11.5	28.7985
pethan	8.6	13.8033	9.7	18.1871
pethan	5.6	9.94824	6.6	9.91606
pethan	6.2	9.77086	7.4	10.8387
pethan	5.2	10.3299	6.5	9.86
pethan	5	10.5998	6.2	9.77086
pethan	7.2	10.529	8.4	13.1775
pethan	5.3	10.2147	6.5	9.86
pethan	9.3	16.4086	10.5	22.3764
pethan		4266.22	5.2	10.3299
pethan			5	10.5998
hik			5.3	10.2147
				4571.93

## Sheet: Sheet5
12.6m					stump		bush			3m (1.5>5)			3m (30>1.5)			3m (30<)			Inasive spp
tree	DBh (2012)	biomass 2012	dbh (2018)	Biomass 2019	2012	2018	spp	2012	2018	spp	2012	2018	spp	2012	2018	Spp	2012	2018	spp	2012	2018
milla	26	269.939	27.1	299.534	4	4	0			gongotu	1.1		migonkarapincha	12	23	migonkarapincha	28	49	hawarinuga	0.5	1
yakada maran	9.8	18.6647	0	0						gongotu	1.8
yakada maran	6.8	10.0677	0	0						bolpana	0.7
yakada maran	27	296.778	29.1	357.427						yakinaran	1.5
waa warana	7.6	11.2011	0	0						migonkarapincha		1.9
gongotu	7.6	11.2011	8.4	13.1775						migonkarapincha		2.3
eraminiya	8.4	13.1775	8.8	14.4818						bolpana		1.6
gongotu	6.5	9.86	7.2	10.529
dunu madala	12	32.5035	13.2	42.739
wa warana	36.5	617.441	37.4	653.984
wa warana	8.6	13.8033	9.7	18.1871
wa warana	5.8	9.83642	6.9	10.1633
wa warana	5.7	9.88574	6.9	10.1633
welan	9.6	17.7227	10.8	24.1647
wa warana	6.8	10.0677	7.9	11.8434
wa warana	7.3	10.6773	8.5	13.4838
wa warana	11.6	29.5132	12.6	37.3842
wa warana	7.4	10.8387	8.3	12.8843
wa warana	15.2	64.0133	16.5	80.667
wa warana	10.7	23.5554	11.8	30.982
wa warana	9.5	17.2715	10.6	22.9593
wa warana	7.6	11.2011	8.5	13.4838
wa warana	10.3	21.25	11.5	28.7985
wa warana	9.4	16.8335	10.7	23.5554
seru	7.8	11.6161	8.9	14.8408
welan	24.2	224.949	25	244.418
welan	6.8	10.0677	7.9	11.8434
ahala	18.8	115.584	19.7	131.145
ahala	16.2	76.6263	17	87.665
seru	14.3	53.7879	15.1	62.8245
seru	10.3	21.25	11	25.4228
seru	8.4	13.1775	9.4	16.8335
welan	6.7	9.98528	7.8	11.6161
wa warana	5.3	10.2147	6.5	9.86
wa warana	11.6	29.5132	12.8	39.1164
wa warana	10	19.6593	11.3	27.4087
wa warana	11.4	28.097	12.6	37.3842
wa warana	7.2	10.529	8.4	13.1775
wa warana	12.2	34.0777	12.5	36.5378
welan	13.3	43.6776	14.5	55.968
welan	20.1	138.403	20.3	142.111
welan	9.4	16.8335	10.6	22.9593
wa warana	8.1	12.3375	9.2	15.9969
wa warana	8.7	14.136	9.9	19.1554
wa warana	7.2	10.529	8.3	12.8843
makulla	28.1	327.822	29	354.407
makulla	20.5	145.871	21.4	163.447
makulla	13	40.9014	13.8	48.5681
wa warana	5.2	10.3299	6.3	9.7874
		2987.28		3345.97

## Sheet: Sheet6
12.6m					stump		bush			3m (1.5>5)			3m (30>1.5)			3m (30<)			Inasive spp
tree	DBh (2012)	Biomass 2012	dbh (2018)	Biomasss 2019	2012	2018	spp	2012	2018	spp	2012	2018	spp	2012	2018	Spp	2012	2018	spp	2012	2018
kuratiya	9.4	16.8335	10	19.6593	0		0			gongotu	1.1	3.2	gongotu	1		3			katakalu	2	7
kuratiya	7.3	10.6773	7.8	11.6161						gongotu	1	2.8							gall	1	5
kuratiya	7	10.272	7.6	11.2011						gongotu	1.1	2.9
kuratiya	8.1	12.3375	8.6	13.8033						gongotu	1.1	2.9
kuratiya	8.2	12.6043	8.7	14.136
welan	42.1	862.155	43.3	919.967
welan	7.4	10.8387	8.5	13.4838
kuratiya	5.4	10.1127	5.9	9.80028
kuratiya	5.8	9.83642	6.5	9.86
kon	19.8	132.939	20.9	153.551
eraminiya	5.1	10.4583	5.7	9.88574
ahala	19.1	120.653	20.6	147.772
kuratiya	5	10.5998	5.6	9.94824
damunu	39.8	756.648	40.3	778.992
hik	20.7	149.685	21.9	173.672
ahala	5.2	10.3299	6.4	9.81712
dambu	6.7	9.98528	7.9	11.8434
milla	9.4	16.8335	10.6	22.9593
hik	8.2	12.6043	9.3	16.4086
hik	49.8	1266.08	50.3	1295.01
hik	5.9	9.80028	6.8	10.0677
kuratiya	10.1	20.1764	11.6	29.5132
kuratiya	5.7	9.88574	6.4	9.81712
eraminiya	5.1	10.4583	5.7	9.88574
eraminiya	6.3	9.7874	6.8	10.0677
yakadamaran	9.2	15.9969	10	19.6593
mas bariyan	6.3	9.7874	7.6	11.2011
eraminiya	6.4	9.81712	6.9	10.1633
kuratiya	9.3	16.4086	9.8	18.6647
kuratiya	6.4	9.81712	7	10.272
eraminiya	5.6	9.94824	6	9.7773
eraminiya	6.5	9.86	6	9.7773
dunu madala	19.2	122.368	20.4	143.984
		3716.6		3956.24

## Sheet: Sheet7
12.6m					stump		bush			3m (1.5>5)			3m (30>1.5)			3m (30<)			Inasive spp
tree	DBh (2012)	Biomass 2012	dbh (2018)	biomass 2019	2012	2018	spp	2012	2018	spp	2012	2018	spp	2012	2018	Spp	2012	2018	spp	2012	2018
damunu	14.9	60.4863	16	73.9983	0		0			thamiliya	4.6		dimbi biju	5	8	dimbi biju	3	12	ginigrass	2	8
damunu	19.8	132.939	21.2	159.449						thamiliya	1.5	2.7							katakalu	4	10
damunu	11.5	28.7985	12.7	38.2437						thamiliya	3.4	4.1							mist	1	6
liniya	5.1	10.4583	5.8	9.83642						kududaula	3.1	4
damunu	7.2	10.529	8.5	13.4838						thamiliya	3.4	3.8
damunu	13	40.9014	14.2	52.7176						migonkarapincha	2.9	3.7
damunu	7.4	10.8387	8.7	14.136						wellangiriya	2.3	0
liniya	5.2	10.3299	6.5	9.86						thamiliya	1.7	0
suriyamara	31.8	443.939	33	485.471
welan	5	10.5998	6.2	9.77086
damunu	16.1	75.3057	17.4	93.5005
damunu	32.5	467.936	33.7	510.574
suriyamara	9.1	15.5984	9.9	19.1554
bambara wel	8.2	12.6043	8.6	13.8033
suriyamara	23.8	215.531	24.7	237.018
suriyamara	25.8	264.73	26.6	285.884
suriyamara	34.2	528.9	34.9	555.11
welan	7	10.272	8.2	12.6043
suriyamara	5.7	9.88574	6.8	10.0677
welan	5.2	10.3299	6.5	9.86
suriyamara	19.3	124.097	20.1	138.403
welan	6.2	9.77086	7.5	11.0133
liniya	5.7	9.88574	6.4	9.81712
liniya	5.2	10.3299	6	9.7773
suriyamara	8.2	12.6043	9.3	16.4086
damunu	15.6	68.9004	17	87.665
welan	51.8	1383.78	52.1	1401.88
welan	26	269.939	27.7	316.349
welan		4260.22	5.7	9.88574
				4615.75

## Sheet: Sheet8
12.6m					stump		bush			3m (1.5>5)			3m (30>1.5)			3m (30<)			Inasive spp
tree	DBh (2012)	Biomass 2012	dbh (2018)	biomass 2019	2012	2018	spp	2012	2018	spp	2012	2018	spp	2012	2018	Spp	2012	2018	spp	2012	2018
welan	24.5	232.151	25.6	259.573	3		0			kudu daula	3.8		kududaula	1	4	nolaba	3	5	mana	5	15
ketakela	62.3	2088.11	62.6	2110.37						kudu daula	4.1
welan	14.3	53.7879	15.5	67.6589						welan	3.2	4.8
welan	11	25.4228	12.3	34.8846						welan		1.8
welan	38.4	695.839	39.7	752.219
liniya	5.6	9.94824	6.2	9.77086
eraminiya	5.6	9.94824	6	9.7773
welan	9.7	18.1871	10.9	24.7872
liniya	6.2	9.77086	7	10.272
eraminiya	5.3	10.2147	5.8	9.83642
liniya	6	9.7773	6.8	10.0677
eraminiya	5.2	10.3299	5.7	9.88574
eraminiya	5.3	10.2147	5.7	9.88574
eraminiya	5	10.5998	5.5	10.0239
		3194.3		3329.01

## Sheet: Sheet9
12.6m					stump		bush			3m (1.5>5)			3m (30>1.5)			3m (30<)			Inasive spp
tree	DBh (2012)	biomass 2012	dbh (2018)	biomass 2019	2012	2018	spp	2012	2018	spp	2012	2018	spp	2012	2018	Spp	2012	2018	spp	2012	2018
kududaula	7.8	11.6161	9	15.213	0	2	0			welan	2.6		yakinaran	5	9	yakinaran	10	10	lantana	20	30
karaw	11	25.4228	12.1	33.284						kon	2.2	3.3
gongotu	12.3	34.8846	13.2	42.739						kon	2.2	3.1
kududaula	24.6	234.578	0							tharana	1.6	2.1
welan	24.7	237.018	25.9	267.328						tharana	1.2	2
mora	21	155.504	22.1	177.854						yakinaran	1.6	2
mora	17.6	96.4973	18.7	113.921						tharana	2.1	2.8
mora	14.2	52.7176	15.5	67.6589						yakinaran		4.1
bala	5.7	9.88574	7.1	10.3939						yakinaran		1.6
bala	8.6	13.8033	10	19.6593
malabada	56.5	1681.09	57	1714.44
milla	13.7	47.5637	14.9	60.4863
bala	10	19.6593	11.2	26.7336
gongotu	5.2	10.3299	6.3	9.7874
mora	14.1	51.6605	15.4	66.4305
uru kanu	42.8	895.648	43.5	929.787
kududaula	24.9	241.938	26.3	277.853
gal siyabla	39.9	761.091	40.8	801.665
milla	8	12.0839	9.5	17.2715
nolaba	14	50.6165	14.8	59.337
milla	51.8	1383.78	52.6	1432.33
milla	10	19.6593	11.4	28.097
milla	36.8	629.503	37.8	670.568
mora	50.8	1324.27	51.6	1371.77
milla	39	721.584	40.3	778.992
mora	9.6	17.7227	10.9	24.7872
		8740.13		9018.38

## Sheet: Sheet10
12.6m					stump		bush			3m (1.5>5)			3m (30>1.5)			3m (30<)			Inasive spp
tree	DBh (2012)	biomass 2012	dbh (2018)	biomass 2019	2012	2018	spp	2012	2018	spp	2012	2018	spp	2012	2018	Spp	2012	2018	spp	2012	2018
hik	20.7	149.685	21.9	173.672	4	4	0			kudu daula	2.4	3.1	kududaula	4	6	monarakudumbiya	78	62	podisinghomaran	3	10
hik	25	244.418	26.3	277.853						burulla	1.5	2.1							katakalu	1	8
dunumadala	19.8	132.939	20.9	153.551						bombu	1.8	2.3
katakala	39.8	756.648	40.7	797.104						kudu daula	4.6
dunumadala	16.5	80.667	17.7	98.0154						milla	3.3	3.9
ma thambala	7.6	11.2011	8.7	14.136						bolpana		1.8
ma thambala	7.7	11.402	8.7	14.136						bala		2.1
dunumadala	32.7	474.911	33.8	514.213
nolaba	8.7	14.136	9.6	17.7227
ipil	15.1	62.8245	17.8	99.5467
kon	43.7	939.66	44.5	979.677
dunumadala	24.8	239.472	26	269.939
dunumadala	13.6	46.5724	14.9	60.4863
eraminiya	5.6	9.94824	6.3	9.7874
dunumadala	14.7	58.2008	16	73.9983
katupila	9.7	18.1871	10.4	21.8066
ipil	14	50.6165	16.8	84.8263
ipil	12.5	36.5378	14.6	57.0778
ipil	13.7	47.5637	15.6	68.9004
ipili	6.5	9.86	8.4	13.1775
ipil	5.4	10.1127	7.5	11.0133
ipil		3405.56	5.3	10.2147
ipil			5.2	10.3299
ipil			5.3	10.2147
				3841.4
