# Supplementary material for: Impact of community-based forest restoration on stand structural attributes, aboveground biomass and carbon stock compared to state-managed forests in tropical ecosystems of Sri Lanka
Source: PeerJ journal article supplement (doi:10.7717/peerj.18176), 2024-09-26
Supplement: State_and_community_managed_forests_Raw_data.zip [file seeradunna community(1).xlsx]

## Sheet: Sheet1
12.6m					stump		bush			3m (1.5>5)			3m (30>1.5)			3m (30<)			Inasive spp
tree	DBh (2012)	biomass 2012	dbh (2018)	biomasss 2019	2012	2018	spp	2012	2018	spp	2012	2018	spp	2012	2018	Spp	2012	2018	spp	2012	2018
kaya	9.1	15.5984	9.9	19.1554
kaya	10.6	22.9593	11.4	28.097
kaya	10.5	22.3764	12.1	33.284
kaya	9.1	15.5984	11	25.4228
damunu	7.2	10.529	8	12.0839
damunu	10.1	20.1764	10.8	24.1647
ketakela	6.2	9.77086	6.9	10.1633
damunu	9.1	15.5984	9.9	19.1554
kaya	10.2	20.7066	11.3	27.4087
kaya	10.4	21.8066	12.6	37.3842
kaya	10.2	20.7066	11.3	27.4087
kaya	10.1	20.1764	11.5	28.7985
kaya	10.4	21.8066	12.3	34.8846
kaya	10.2	20.7066	11	25.4228
kaya	10.3	21.25	12	32.5035
welan	10.2	20.7066	11	25.4228
damunu	10.1	20.1764	11.2	26.7336
kon	6.2	9.77086	8.3	12.8843

## Sheet: Sheet2
12.6m					stump		bush			3m (1.5>5)			3m (30>1.5)			3m (30<)			Inasive spp
tree	DBh (2012)	Biomass 2012	dbh (2018)	biomass 2019	2012	2018	spp	2012	2018	spp	2012	2018	spp	2012	2018	Spp	2012	2018	spp	2012	2018
welan	10.2	20.7066	11	25.4228
welan	20.3	142.111	20.9	153.551
welan	20.6	147.772	21.3	161.441
pannakka	10.2	20.7066	10.8	24.1647
ketakela	6.2	9.77086	7.1	10.3939
ketakela	10.1	20.1764	10.8	24.1647
damba	35.6	581.965	36	597.6
dambe	28.3	333.638	29	354.407
welan	14.1	51.6605	14.9	60.4863
damunu	10.1	20.1764	11	25.4228
damunu	9.8	18.6647	11.2	26.7336
weera	34.4	536.323	35	558.907
weera	31.2	423.884	31.9	447.328

## Sheet: Sheet3
12.6m					stump		bush			3m (1.5>5)			3m (30>1.5)			3m (30<)			Inasive spp
tree	DBh (2012)	biomass 2012	dbh (2018)	biomass 2019	2012	2018	spp	2012	2018	spp	2012	2018	spp	2012	2018	Spp	2012	2018	spp	2012	2018
welan	7.5	11.0133	8.4	13.1775
kirikon	12	32.5035	13.1	41.8136
seru	8.2	12.6043	9.3	16.4086
seru	6.3	9.7874	7.2	10.529
damunu	17.7	98.0154	18.5	110.635
damunu	15.7	70.1551	16.2	76.6263
damunu	19	118.95	19.7	131.145
burutha	17.3	92.0219	18	102.649
burutha	16.1	75.3057	16.8	84.8263
gaduba	7.8	11.6161	8.7	14.136
gaduba	7.2	10.529	9.1	15.5984
gaduba	5.1	10.4583	7.6	11.2011
kaliya	9.3	16.4086	10.6	22.9593
kaliya	11.4	28.097	12.7	38.2437
keppetiya	6.2	9.77086	6.9	10.1633
keppetiya	7.3	10.6773	8.1	12.3375
korakaha	14.9	60.4863	15.7	70.1551
korakaha	7.5	11.0133	8.3	12.8843
keppetiya	6.4	9.81712	7.2	10.529
keppetiya	7.2	10.529	8	12.0839
keppetiya	5.2	10.3299	6.4	9.81712

## Sheet: Sheet4
12.6m					stump		bush			3m (1.5>5)			3m (30>1.5)			3m (30<)			Inasive spp
tree	DBh (2012)	biomass 2012	dbh (2018)	biomass 2019	2012	2018	spp	2012	2018	spp	2012	2018	spp	2012	2018	Spp	2012	2018	spp	2012	2018
galsiyabala	31.3	427.194	32.3	461.014
kunuwella	11.3	27.4087	12.1	33.284
kunuwella	6.2	9.77086	7	10.272
kunuwella	6.4	9.81712	7.3	10.6773
makulla	27.4	307.882	28.3	333.638
damunu	14.4	54.8714	15.1	62.8245
keppetiya	7.2	10.529	7.9	11.8434
makulla	28.1	327.822	28.8	348.407
keppetiya	5.4	10.1127	6.7	9.98528
damuna	11.3	27.4087	12	32.5035
damuna	9.3	16.4086	10.6	22.9593
damuna	9.2	15.9969	10.6	22.9593
damuna	6.7	9.98528	8	12.0839
welan	11	25.4228	12.2	34.0777
nolaba	6.4	9.81712	7.3	10.6773
nolaba	7.1	10.3939	8.3	12.8843
kuuratiya	5.3	10.2147	6.1	9.7675
seru	16.4	79.3069	17.5	94.9923
welan	32	450.729	32.9	481.938
keppetiya	6.7	9.98528	7.4	10.8387
keppetiya	5.9	9.80028	6.4	9.81712
keppetiya	5.9	9.80028	6.7	9.98528
keppetiya	5.2	10.3299	5.8	9.83642

## Sheet: Sheet5
12.6m					stump		bush			3m (1.5>5)			3m (30>1.5)			3m (30<)			Inasive spp
tree	DBh (2012)	biomass 2012	dbh (2018)	biomass 2019	2012	2018	spp	2012	2018	spp	2012	2018	spp	2012	2018	Spp	2012	2018	spp	2012	2018
welan	34.2	528.9	35.2	566.54
ginisiriya	11	25.4228	12.8	39.1164
ginisiriya	11.3	27.4087	13.2	42.739
ginisiriya	11.7	30.241	13.6	46.5724
keppetiya	5.6	9.94824	6.8	10.0677
keppetiya	6	9.7773	7.2	10.529
ginisiriya	9.2	15.9969	11.4	28.097
welan	30.1	388.349	31.6	437.202
keppetiya	5.3	10.2147	6.2	9.77086
keppetiya	5.6	9.94824	6.8	10.0677

## Sheet: Sheet6
12.6m					stump		bush			3m (1.5>5)			3m (30>1.5)			3m (30<)			Inasive spp
tree	DBh (2012)	biomass 2012	dbh (2018)	biomass 2019	2012	2018	spp	2012	2018	spp	2012	2018	spp	2012	2018	Spp	2012	2018	spp	2012	2018
kohomba	14.1	51.6605	15	61.6488
kohomba	12	32.5035	13.3	43.6776
damunu	7.8	11.6161	9.2	15.9969
keppetiya	5.1	10.4583	6.2	9.77086
keppetiya	5.3	10.2147	6.4	9.81712
damunu	9.8	18.6647	11	25.4228
ginisiriya	12.1	33.284	13.8	48.5681
ginisiriya	7.2	10.529	9.2	15.9969
keppetiya	6.1	9.7675	6.9	10.1633
keppetiya	5.7	9.88574	6.8	10.0677
damunu	9	15.213	10.4	21.8066
buruth	17	87.665	18.1	104.22
keppetiya	6.3	9.7874	7.7	11.402
keppetiya	6.2	9.77086	7.6	11.2011
ketakela	28.8	348.407	30	385.197
keppetya	7	10.272	7.9	11.8434
kuratiya	5.8	9.83642	7.1	10.3939
kutratiya	5.9	9.80028	7.1	10.3939
welan	16.9	86.2391	18.2	105.804
welan	12.7	38.2437	14.2	52.7176
keppetiya	5.2	10.3299	6	9.7773

## Sheet: Sheet7
12.6m					stump		bush			3m (1.5>5)			3m (30>1.5)			3m (30<)			Inasive spp
tree	DBh (2012)	Biomass 2012	dbh (2018)	biomass 2019	2012	2018	spp	2012	2018	spp	2012	2018	spp	2012	2018	Spp	2012	2018	spp	2012	2018
akeshiya	11	25.4228	12.4	35.7046
akeshiya	11.5	28.7985	12.8	39.1164
akeshiya	12.2	34.0777	13.5	45.5943
ginisiriya	9	15.213	10.8	24.1647
keppetiya	5.4	10.1127	6.8	10.0677
akeshiya	11.4	28.097	12.7	38.2437
gaduba	8	12.0839	9.6	17.7227
akeshiya	9.7	18.1871	11.2	26.7336
keppetiyaa	5.8	9.83642	7.2	10.529
keppetiya	5.3	10.2147	7.1	10.3939

## Sheet: Sheet8
12.6m					stump		bush			3m (1.5>5)			3m (30>1.5)			3m (30<)			Inasive spp
tree	DBh (2012)	BIOMASS 2012	dbh (2018)	BIOMASS 2019	2012	2018	spp	2012	2018	spp	2012	2018	spp	2012	2018	Spp	2012	2018	spp	2012	2018
kaya	9.8	18.6647	11.4	28.097
kaya	11.3	27.4087	13.5	45.5943
kaya	11.4	28.097	13.5	45.5943
mila	7	10.272	8.4	13.1775
damunu	9.3	16.4086	10.6	22.9593
damunu	9.7	18.1871	10.9	24.7872
kuratiya	6.1	9.7675	6.8	10.0677
keppetiya	5.5	10.0239	6.3	9.7874
kaya	10.7	23.5554	12.4	35.7046
kaya	11	25.4228	13.3	43.6776
akeshiya	11.3	27.4087	12.9	40.0023
damunu	9	15.213	10.2	20.7066
damunu	9.4	16.8335	10.8	24.1647
keppetiya	6.7	9.98528	7.5	11.0133
keppetiya	5.3	10.2147	6.1	9.7675

## Sheet: Sheet9
12.6m					stump		bush			3m (1.5>5)			3m (30>1.5)			3m (30<)			Inasive spp
tree	DBh (2012)	BIOMASS 2012	dbh (2018)	BIOMASS 2019	2012	2018	spp	2012	2018	spp	2012	2018	spp	2012	2018	Spp	2012	2018	spp	2012	2018
milla	11	25.4228	12.3	34.8846
bombu	6.4	9.81712	7.8	11.6161
milla	9.8	18.6647	11.3	27.4087
milla	9.6	17.7227	11	25.4228
kuratiya	6.8	10.0677	7.6	11.2011
welan	18.9	117.261	20.2	140.25
kuratiya	6.2	9.77086	7.1	10.3939
welan	24.7	237.018	25.9	267.328
keppetiya	5.8	9.83642	6.7	9.98528
ketakela	18.1	104.22	20	136.568
damba	41	810.826	42.4	876.43
milla	7.1	10.3939	9.4	16.8335
milla	7.6	11.2011	9.8	18.6647
welan	9.2	15.9969	11.3	27.4087
welan	8.7	14.136	10.5	22.3764
kuratiya	5.6	9.94824	6.4	9.81712
keppetiya	6.2	9.77086	7.3	10.6773
keppetiya	6.4	9.81712	7.1	10.3939
damunu	9.4	16.8335	10.9	24.7872
keppetiya	5.2	10.3299	5.9	9.80028
keppetiya	6.4	9.81712	7.3	10.6773
milla	7	10.272	9.2	15.9969

## Sheet: Sheet10
12.6m					stump		bush			3m (1.5>5)			3m (30>1.5)			3m (30<)			Inasive spp
tree	DBh (2012)	biomass 2012	dbh (2018)	biomass 2019	2012	2018	spp	2012	2018	spp	2012	2018	spp	2012	2018	Spp	2012	2018	spp	2012	2018
andara	16.4	79.3069	17.5	94.9923
damunu	11.3	27.4087	12.9	40.0023
damunu	7.1	10.3939	9	15.213
damunu	6.7	9.98528	8.7	14.136
keppetiya	5.8	9.83642	6.6	9.91606
andara	10.1	20.1764	11.8	30.982
damunu	17.4	93.5005	18.9	117.261
keppetiya	6.3	9.7874	6.9	10.1633
welan	24	220.213	25.4	254.468
damunu	32.7	474.911	34	521.53
damunu	33	485.471	35.2	566.54
ketakela	17	87.665	18.7	113.921
keppetiya	5.1	10.4583	5.8	9.83642
keppetiya	5	10.5998	5.8	9.83642
keppetiya	5.4	10.1127	6.3	9.7874
keppetiya	6.1	9.7675	6.8	10.0677
keppetiya	5.7	9.88574	6.5	9.86
keppetiya	5.2	10.3299	5.9	9.80028
keppetiya	6.2	9.77086	7	10.272
keppetiya	6	9.7773	6.8	10.0677
welan	8.3	12.8843	11	25.4228
welan	8	12.0839	10.8	24.1647
welan			5.4	10.1127
welan			5	10.5998
