# Supplementary material for: Impact of community-based forest restoration on stand structural attributes, aboveground biomass and carbon stock compared to state-managed forests in tropical ecosystems of Sri Lanka
Source: PeerJ journal article supplement (doi:10.7717/peerj.18176), 2024-09-26
Supplement: State_and_community_managed_forests_Raw_data.zip [file seeradunna state.xlsx]

## Sheet: Sheet1
12.6m					stump		bush/wel			3m (1.5>5)			3m (30>1.5)			3m (30<)			Inasive spp
tree	DBh (2012)	biomasss 2012	dbh (2018)	biomass 2019
welan	33	485.471	34.4	536.323
bala	9	15.213	10.2	20.7066
keppetia	8.6	13.8033	9.1	15.5984
koon	35.6	581.965	36.3	609.465
koon	41.8	847.998	42.6	886.013
makulla	8.5	13.4838	9.7	18.1871
makulla	6.8	10.0677	7.4	10.8387
keppetiya	6.5	9.86	7.2	10.529
bla	5.5	10.0239	6.4	9.81712
keppetiya	6.8	10.0677	7.5	11.0133
kos	44.8	994.901	45.2	1015.38
1	11.4	28.097	12.1	33.284
1	6.5	9.86	7.2	10.529
1	6.8	10.0677	7.6	11.2011
1	7.8	11.6161	8.4	13.1775
1	8.1	12.3375	8.9	14.8408
1	12.6	37.3842	13.3	43.6776
keppetiya	6.8	10.0677	7.3	10.6773
gonna	5.4	10.1127	6.3	9.7874
gonna	8.6	13.8033	9.2	15.9969
keppetiya	16.5	80.667	17.1	89.1041
3	13.9	49.5857	14.3	53.7879
3	10.4	21.8066	11	25.4228
3	7.9	11.8434	8.3	12.8843
3	14	50.6165	14.7	58.2008
kos	36.5	617.441	37.3	649.871
mora	10.9	24.7872	11.8	30.982
kohu kirilla	9.1	15.5984	11.1	26.0716
3	6.3	9.7874	7.1	10.3939
makulla	17.5	94.9923	18.9	117.261
3	14.6	57.0778	15.2	64.0133
makulla	14.8	59.337	15.3	65.2153
1	5.8	9.83642	6.4	9.81712
kohu kirilla	10.4	21.8066	11.6	29.5132
damunu	24.1	222.575	24.9	241.938
keppetiya	6.8	10.0677	7.4	10.8387
keppetiya	6.4	9.81712	7.1	10.3939
keppetiya	5.6	9.94824	6	9.7773
1	8.9	14.8408	9.7	18.1871
bala	6.3	9.7874	7.2	10.529
1	7.2	10.529	8	12.0839
keppetiya	5.5	10.0239	6.3	9.7874
hal milla	8.6	13.8033	9.3	16.4086
halmilla	7.2	10.529	8	12.0839
kala wel	6.4	9.81712	7	10.272
2	12	32.5035	13.3	43.6776
keppetiya		4625.63	5.3	10.2147
keppetiya			5.6	9.94824
				4975.72

## Sheet: Sheet2
12.6m					stump		bush			3m (1.5>5)			3m (30>1.5)			3m (30<)			Inasive spp
tree	DBh (2012)	biomass 2012	dbh (2018)	biomass 2019	2012	2018	spp	2012	2018	spp	2012	2018	spp	2012	2018	Spp	2012	2018	spp	2012	2018
damunu	5.6	9.94824	6.3	9.7874
damunu	5.1	10.4583	6.3	9.7874
damunu	9.2	15.9969	10.2	20.7066
damunu	5.3	10.2147	6.2	9.77086
damunu	10.1	20.1764	11	25.4228
welan	10.3	21.25	11.2	26.7336
damunu	7	10.272	8.2	12.6043
damunu	6.2	9.77086	7.4	10.8387
damunu	7.2	10.529	8.1	12.3375
damunu	35.5	578.089	36.4	613.447
damunu	6.2	9.77086	7	10.272
damunu	6.2	9.77086	6.9	10.1633
katakela	9.2	15.9969	10	19.6593
damunu	9	15.213	9.8	18.6647
damunu	5.2	10.3299	6.1	9.7675
damunu	5.6	9.94824	6.4	9.81712
akeshiya	8.2	12.6043	10.2	20.7066
akeshiya	15.1	62.8245	16.9	86.2391
damunu	5	10.5998	6.7	9.98528
damunu	47.2	1120.96	48.5	1192.41			6
damunu	7.6	11.2011	9.2	15.9969
damunu	5.1	10.4583	6.4	9.81712
damunu	8.3	12.8843	9.4	16.8335
kohomba	14	50.6165	15.3	65.2153
damunu	17.1	89.1041	18.3	107.401
damunu	9.2	15.9969	10.6	22.9593
damunu	58.3	1802.67	59.5	1886.09
damunu	7.5	11.0133	8.9	14.8408
damunu	8.4	13.1775	9.7	18.1871
kohomba	11.2	26.7336	12.3	34.8846
katakela	18.2	105.804	19.3	124.097
damunu		4124.38	6.3	9.7874
akeshiya			7	10.272
welan			5.4	10.1127
damunu			5.6	9.94824
				4495.56

## Sheet: Sheet3
12.6m					stump		bush			3m (1.5>5)			3m (30>1.5)			3m (30<)			Inasive spp
tree	DBh (2012)	biomass 2012	dbh (2018)	biomass 2019	2012	2018	spp	2012	2018	spp	2012	2018	spp	2012	2018	Spp	2012	2018	spp	2012	2018
teak	38.3	691.594	38.9	717.26	0		0			damaniya	4			0	23	hulan thala	2	78	gini grass	0.7	0
teak	31.2	423.884	31.8	443.939															naththa suriya	0.2	20
teak	28.5	339.506	29.1	357.427															rila thana	3	0
teak	5.6	9.94824	7.4	10.8387															balu naguta	3	2
teak	8.3	12.8843	10.2	20.7066															lantana	2	0
teak	28.3	333.638	29	354.407
teak	18.2	105.804	19.6	129.363
teak	43.2	915.077	43.9	949.585
teak	29.2	360.46	30.1	388.349
teak	19.8	132.939	21.2	159.449
		3325.73		3531.32

## Sheet: Sheet4
12.6m					stump		bush			3m (1.5>5)			3m (30>1.5)			3m (30<)			Inasive spp
tree	DBh (2012)	biomass 2012	dbh (2018)	biomass 2019	2012	2018	spp	2012	2018	spp	2012	2018	spp	2012	2018	Spp	2012	2018	spp	2012	2018
akeshiya	12.1	33.284	14.3	53.7879	5	5				gammalu	2.5		bowitiya	8	12	thora	6	98	lantana	6	0
akeshiya	7.2	10.529	9.4	16.8335						karanda		1.9							mana	35	10
akeshiya	46	1056.98	48.2	1175.72						nelli	4.6								gini grass	20	0
akeshiya	16.2	76.6263	18.3	107.401						nelli		3.8							naththasuriya	10	5
akeshiya	14.1	51.6605	16.4	79.3069						nelli		2.9
akeshiya	9.6	17.7227	11.7	30.241						nelli		3.6
akeshiya	24	220.213	26.3	277.853						nelli		2.6
akeshiya	8.1	12.3375	10.3	21.25						nelli		4.1
akeshiya	27.2	302.304	29.5	369.638						nelli		3.9
akeshiya	14	50.6165	16.4	79.3069						karanda		3.1
damunu	25.1	246.911	27	296.778						nelli		4.7
akeshiya	19.2	122.368	21.4	163.447
akeshiya	48	1164.66	50.3	1295.01
akeshiya	33	485.471	35.2	566.54
akeshiya	17	87.665	19.2	122.368
akeshiya	21.3	161.441	23.2	201.798
damunu	9.1	15.5984	10.4	21.8066
damunu	13	40.9014	14.3	53.7879
akeshiya	44	954.567	46.3	1072.8
		5111.86		6005.68

## Sheet: Sheet5
12.6m					stump		bush			3m (1.5>5)			3m (30>1.5)			3m (30<)			Inasive spp
tree	DBh (2012)	biomass 2012	dbh (2018)	biomass 2019	2012	2018	spp	2012	2018	spp	2012	2018	spp	2012	2018	Spp	2012	2018	spp	2012	2018
katakala	23	197.326	24.2	224.949
damuna	25.1	246.911	27.3	305.086
akeshiya	16.2	76.6263	18.4	109.011
akeshiya	13.5	45.5943	15.6	68.9004
damuna	8	12.0839	10.3	21.25
akeshiya	16.1	75.3057	18.4	109.011
akeshiya	36	597.6	38.9	717.26
akeshiya	14.2	52.7176	16.4	79.3069
akeshiya	24	220.213	26.3	277.853
damuna	36.1	601.542	37.9	674.747
damuna	29.1	357.427	31	417.305
damuna	11.6	29.5132	13.1	41.8136
damuna	19.2	122.368	21.2	159.449
akeshiya	10.2	20.7066	12.4	35.7046
akeshiya	14	50.6165	16.2	76.6263
akeshiya	18.1	104.22	20.4	143.984
		2810.77		3462.26

## Sheet: Sheet6
12.6m					stump		bush			3m (1.5>5)			3m (30>1.5)			3m (30<)			Inasive spp
tree	DBh (2012)	imass 2012	dbh (2018)	Biomass 2019	2012	2018	spp	2012	2018	spp	2012	2018	spp	2012	2018	Spp	2012	2018	spp	2012	2018
akeshiya	41.8	847.998	43	905.336
katakla	20	136.568	0
kon	27.9	322.059	28.4	336.565
damunu	9	15.213	11.2	26.7336
welan	9	15.213	11	25.4228
welan	7.8	11.6161	9.8	18.6647
welan	10.2	20.7066	12.1	33.284
welan	7	10.272	9.3	16.4086
damunu	6	9.7773	8.4	13.1775
welan	6	9.7773	8.1	12.3375
damunu	10.1	20.1764	12.3	34.8846
katakla	6.1	9.7675	8.3	12.8843
katakla	20.2	140.25	22	175.756
katakla	20.3	142.111	21.8	171.601
damunu	43.5	929.787	44.3	969.594
damunu	10.2	20.7066	11.9	31.7362
katakla	10.7	23.5554	12.4	35.7046
katakla	10.1	20.1764	12	32.5035
katakala	52	1395.84	52.7	1438.46
katakala	30.6	404.304	31.7	440.564
katakala	10.7	23.5554	12.8	39.1164
katakala	22.3	182.089	23.4	206.323
katakala	20.1	138.403	21.9	173.672
damunu	20.7	149.685	22	175.756
muwakiriwel	5.3	10.2147	5.9	9.80028
welan	10.4	21.8066	11.7	30.241
welan		5031.62	5.9	9.80028
welan			6.2	9.77086
				5386.1

## Sheet: Sheet7
12.6m					stump		bush			3m (1.5>5)			3m (30>1.5)			3m (30<)			Inasive spp
tree	DBh (2012)	Biomasss 2012	dbh (2018)	Biomass 2019	2012	2018	spp	2012	2018	spp	2012	2018	spp	2012	2018	Spp	2012	2018	spp	2012	2018
welan	12.3	34.8846	14	50.6165
welan	27.8	319.197	28.8	348.407
welan	11.6	29.5132	13.3	43.6776
ketakela	5.3	10.2147	7.1	10.3939
welan	5.9	9.80028	7.3	10.6773
ketakela	32.1	454.144	32.9	481.938
damunu	18.3	107.401	19.7	131.145
damunu	7.2	10.529	9	15.213
damunu	6	9.7773	8.6	13.8033
damunu	11.5	28.7985	12.8	39.1164
ginisiriya	13.5	45.5943	15.2	64.0133
ginisiriya	18.3	107.401	20.1	138.403
kon	7	10.272	9.2	15.9969
kon	11.4	28.097	13.2	42.739
kon	41.4	829.306	42.3	871.658
kon		2034.93	6.5	9.86
welan			5.4	10.1127
				2297.77

## Sheet: Sheet8
12.6m					stump		bush			3m (1.5>5)			3m (30>1.5)			3m (30<)			Inasive spp
tree	DBh (2012)	Biomass 2012	dbh (2018)	biomass 2019	2012	2018	spp	2012	2018	spp	2012	2018	spp	2012	2018	Spp	2012	2018	spp	2012	2018
damunu	56.1	1654.66	56.9	1707.74	3	4	0	0	0	kon	5		gammalu	3	18	hulanthala	16	64	lantana	30	10
damunu	31.4	430.517	32.2	457.573			wellangiriya	1		wellangiri	3								mana	40	30
kirikon	74.2	3061.91	74.9	3125			thithawal	2
seru	10.4	21.8066	11.4	28.097			weldehi	2
seru	10.7	23.5554	11.9	31.7362			kalawel	2
seru	10.4	21.8066	11.8	30.982
seru	7.1	10.3939	8.8	14.4818
damunu		5224.64	6.1	9.7675
seru			5.8	9.83642
seru			5.3	10.2147
seru			5.4	10.1127
				34.4703
				5470.01

## Sheet: Sheet9
12.6m					stump		bush			3m (1.5>5)			3m (30>1.5)			3m (30<)			Inasive spp
tree	DBh (2012)	Biomass 2012	dbh (2018)	biomass 2019	2012	2018	spp	2012	2018	spp	2012	2018	spp	2012	2018	Spp	2012	2018	spp	2012	2018
kaliya	8	12.0839	9.8	18.6647	1	1	0			radaliya			welan	7	13	thora	10	56	lantana	10	2
damunu	8.3	12.8843	0	34.4703						kudumirissa	24								mana	55	15
gaduba	10.6	22.9593	11.8	30.982						kalawel
gaduba	12	32.5035	13.5	45.5943						wenbadanga
kaluwara	8	12.0839	10.2	20.7066						eraminiya
welan	39.1	725.921	40.7	797.104
damunu	29.5	369.638	30.2	391.513
burutha	14	50.6165	15.3	65.2153
burutha	6.1	9.7675	7.8	11.6161
gaduba	7.3	10.6773	9.4	16.8335
welan	47.4	1131.81	48.2	1175.72
klawel	5.7	9.88574	6.2	9.77086
welan		2400.83	5.8	9.83642
gaduba			6.4	9.81712
gaduba			6.5	9.86
welan			5.2	10.3299
				2658.04

## Sheet: Sheet10
12.6m					stump		bush			3m (1.5>5)			3m (30>1.5)			3m (30<)			Inasive spp
tree	DBh (2012)	biomass 2012	dbh (2018)	biomass 2019	2012	2018	spp	2012	2018	spp	2012	2018	spp	2012	2018	Spp	2012	2018	spp	2012	2018
damunu	13.9	49.5857	15	61.6488
welan	7.4	10.8387	9.1	15.5984
damunu	12.8	39.1164	14.2	52.7176
damunu	9.8	18.6647	11.2	26.7336
damunu	7.6	11.2011	9.1	15.5984
damunu	10.8	24.1647	12.3	34.8846
damunu	8	12.0839	10.2	20.7066
damunu	16.6	82.0403	18.2	105.804
damunu	12.7	38.2437	14.3	53.7879
katakele	30.3	394.691	31.8	443.939
welan	11.7	30.241	13	40.9014
damunu	11	25.4228	13.2	42.739
welan	5.6	9.94824	7.3	10.6773
damunu	11.5	28.7985	13.1	41.8136
damunu	7.4	10.8387	9.1	15.5984
kon	11.6	29.5132	13	40.9014
damunu	5.9	9.80028	7.4	10.8387
damunu	7.3	10.6773	9.1	15.5984
welan	10	19.6593	12.1	33.284
damunu	7.6	11.2011	9.3	16.4086
welan	8.2	12.6043	10.4	21.8066
damunu	5	10.5998	7.8	11.6161
seru	7.1	10.3939	9.6	17.7227
nithul	5	10.5998	7.1	10.3939
nithul	5.6	9.94824	6.7	9.98528
nithul	5	10.5998	5.9	9.80028
mora	7.1	10.3939	8.9	14.8408
mora	7.9	11.8434	8.6	13.8033
karapincha	5.3	10.2147	7.1	10.3939
damunu	12.6	37.3842	13.9	49.5857
damunu	13.6	46.5724	15.4	66.4305
damunu	7	10.272	8.6	13.8033
kaliya	5.6	9.94824	7.4	10.8387
damunu	11.3	27.4087	13.4	44.6294
damunu	20.4	143.984	21.9	173.672
kon		1239.5	5.8	9.83642
damunu			6.1	9.7675
				1599.11
