# Supplementary material for: Impact of community-based forest restoration on stand structural attributes, aboveground biomass and carbon stock compared to state-managed forests in tropical ecosystems of Sri Lanka
Source: PeerJ journal article supplement (doi:10.7717/peerj.18176), 2024-09-26
Supplement: State_and_community_managed_forests_Raw_data.zip [file walasgala community(1).xlsx]

## Sheet: Sheet1
12.6m					stump		bush			3m (1.5>5)			3m (30>1.5)			3m (30<)			Inasive spp
tree	DBh (2012)	biomass 2012	dbh (2018)	Biomass 2019	2012	2018	spp	2012	2018	spp	2012	2018	spp	2012	2018	Spp	2012	2018	spp	2012	2018
welan	36.3	609.465	37	637.611	3	0	indi	2		nelli		3.8	podisinghomaran	3	12	Balunaguta	25	46	lantana	0.08	0
dunumadala	23	197.326	24.2	224.949						nelli		4.1							naththa suriya	0.07	7
welan	43.2	915.077	43.8	944.616						nelli		2.8							mana	0.3	10
ipil	12.6	37.3842	14.3	53.7879						nelli		3.8							gini grass	0.12	0
ipil	18.2	105.804	20.3	142.111						nelli		3.2							podisinghomaran	0.03	0
ipil	6.7	9.98528	8.9	14.8408						ginisapu		4.8
welan	11.7	30.241	12.7	38.2437
welan	6.4	9.81712	7.8	11.6161
pethan	8.5	13.4838	9.6	17.7227
pethan	12.3	34.8846	13	40.9014
dunumadala	30	385.197	30.8	410.778
pethan	11	25.4228	12.1	33.284
pethan	8	12.0839	9.4	16.8335
keppetiya	5.6	9.94824	6.3	9.7874
keppetiya	5.3	10.2147	5.8	9.83642
welan		2406.34	5.6	9.94824
welan			5.3	10.2147
welan			5	10.5998
ipil			6.1	9.7675
pethan			5.4	10.1127
				2657.56

## Sheet: Sheet2
12.6m					stump		bush			3m (1.5>5)			3m (30>1.5)			3m (30<)			Inasive spp
tree	DBh (2012)	Biomass 2012	dbh (2018)	biomass 2019	2012	2018	spp	2012	2018	spp	2012	2018	spp	2012	2018	Spp	2012	2018	spp	2012	2018
thelabu	41.3	824.667	41.8	847.998	0		0			nelli		3.6	gammalu	2	14	gini grass	1	85	naththa S	12	10
ketakela	28.3	333.638	29.2	360.46						nelli		3.2							lanthana	7	2
ketakela	36.1	601.542	37	637.611						nelli		1.9							Gini grass	65	0
kuratiya	6.3	9.7874	7	10.272						nelli		2.6
kuratiya	6.2	9.77086	6.9	10.1633						nelli		3.6
ipil	14.3	53.7879	16.6	82.0403						nelli		3.1
ipil	6.4	9.81712	8.7	14.136						welan	4.2
ipil	10	19.6593	12.5	36.5378						welan	3.6	4.8
ipil	8.4	13.1775	10.2	20.7066
kuratiya	6.4	9.81712	7.2	10.529
ipil	5.4	10.1127	7.3	10.6773
ipil	12	32.5035	14.3	53.7879
ipil		1928.28	5.3	10.2147
ipil			6.1	9.7675
ketakela			5.3	10.2147
				2125.12

## Sheet: Sheet3
12.6m					stump		bush			3m (1.5>5)			3m (30>1.5)			3m (30<)			Inasive spp
tree	DBh (2012)	biomass 2012	dbh (2018)	biomass 2019	2012	2018	spp	2012	2018	spp	2012	2018	spp	2012	2018	Spp	2012	2018	spp	2012	2018
welan	27.3	305.086	27.8	319.197	0		0			nelli		2.1		0	23	hulan thala	2	78	gini grass	0.7	0
welan	19.4	125.839	20.1	138.403						nelli		3.2							naththa suriya	0.2	20
seru	5.8	9.83642	6.5	9.86						nelli		2.7							rila thana	3	0
nolaba	8	12.0839	9.7	18.1871						nelli		3.5							balu naguta	3	2
pethan	9.3	16.4086	10.2	20.7066						ginisapu		4.1							lantana	2	0
nolaba	10	19.6593	11.3	27.4087						nelli		3.4
kukuruman	6.8	10.0677	7.3	10.6773						damba	4.6
pethan	12	32.5035	13.2	42.739
siyabala	28.4	336.565	29.2	360.46
setu	8.3	12.8843	9.1	15.5984
kukuruman	8.4	13.1775	8.8	14.4818
pethan		894.112	5.6	9.94824
welan			5.3	10.2147
welan			5.2	10.3299
siyabala			5.1	10.4583
				1018.67

## Sheet: Sheet4
12.6m					stump		bush			3m (1.5>5)			3m (30>1.5)			3m (30<)			Inasive spp
tree	DBh (2012)	Biomass 2012	dbh (2018)	biomass 2019	2012	2018	spp	2012	2018	spp	2012	2018	spp	2012	2018	Spp	2012	2018	spp	2012	2018
pethan	8.2	12.6043	9.3	16.4086	5	5				gammalu	2.5		bowitiya	8	12	thora	6	98	lantana	6	0
pethan	9.3	16.4086	10.1	20.1764						karanda		1.9							mana	35	10
hik	32.4	464.468	33.2	492.578						nelli	4.6								gini grass	20	0
hik	36	597.6	37.1	641.685						nelli		3.8							naththasuriya	10	5
karakola	11.1	26.0716	11.8	30.982						nelli		2.9
karakola	8.7	14.136	9.5	17.2715						nelli		3.6
pethan	10.3	21.25	11.2	26.7336						nelli		2.6
pethan	5.8	9.83642	6.5	9.86						nelli		4.1
pethan	6.3	9.7874	7.1	10.3939						nelli		3.9
pethan	7.2	10.529	8	12.0839						karanda		3.1
pethan	11.4	28.097	12.7	38.2437						nelli		4.7
ketakala	22.3	182.089	23	197.326
pethan	9.4	16.8335	10.2	20.7066
pethan	8.3	12.8843	9.5	17.2715
		1422.6		1551.72

## Sheet: Sheet5
12.6m					stump		bush			3m (1.5>5)			3m (30>1.5)			3m (30<)			Inasive spp
tree	DBh (2012)	biomass 2012	dbh (2018)	biomass 2019	2012	2018	spp	2012	2018	spp	2012	2018	spp	2012	2018	Spp	2012	2018	spp	2012	2018
kukuruman	6.8	10.0677	7.4	10.8387	0		indi	2		nelli	3.7		pera	6	18	Bowitiya	8	102	Lantana	50	0
kukuruman	6.5	9.86	7.2	10.529						ginisiriya	3.2								Mana	20	5
pethan	5.7	9.88574	6.5	9.86						karanda		2.6							Gini grass	10	0
welan	28.2	330.723	29	354.407						nelli		2.1
welan	27	296.778	27.7	316.349						nelli		1.8
welan	16.3	77.96	17.1	89.1041						nelli		2.3
welan		735.275	5.4	10.1127						nelli		3.6
welan			5.3	10.2147						ginisiriya		4.1
				811.415						batu		1.8

## Sheet: Sheet6
12.6m					stump		bush			3m (1.5>5)			3m (30>1.5)			3m (30<)			Inasive spp
tree	DBh (2012)	biomass 2012	dbh (2018)	biomass 2019	2012	2018	spp	2012	2018	spp	2012	2018	spp	2012	2018	Spp	2012	2018	spp	2012	2018
nolaba	6.8	10.0677	7.4	10.8387	0		indi	1		nelli	4.2		0	21	41	podisingnomaran	10	62	ginigrass	14	5
damunu	48.3	1181.27	48.7	1203.6						nelli		3.3							rila thana	56	5
damunu	27	296.778	27.7	316.349						nelli		1.9							lantana	12	2
nolaba	10.3	21.25	11.4	28.097						nelli		2.4							podisinm	3	0
pethan	8.4	13.1775	9.5	17.2715						nelli		4.6							illuk	7	0
pethan	8	12.0839	9.3	16.4086						karanda		2.6
pethan	7.4	10.8387	8.7	14.136						thibbatu		1.8
nolaba	10.4	21.8066	11.6	29.5132						hulanhik	4.2
nolaba	7.3	10.6773	8.5	13.4838						hulanhik	3.8
damunu	7.4	10.8387	8.7	14.136
kuratiya	6	9.7773	6.7	9.98528
ipil	5.6	9.94824	7.3	10.6773
ipil	5.3	10.2147	7.1	10.3939
ipil	5.7	9.88574	7.8	11.6161
kon	11.9	31.7362	12.8	39.1164
kon	32.3	461.014	33.2	492.578
kon	28.3	333.638	29.4	366.565
nolaba	8.7	14.136	9.5	17.2715
ipil	6.3	9.7874	7.3	10.6773
		2478.93		2632.71

## Sheet: Sheet7
12.6m					stump		bush			3m (1.5>5)			3m (30>1.5)			3m (30<)			Inasive spp
tree	DBh (2012)	Biomass 2012	dbh (2018)	Biomass 2019	2012	2018	spp	2012	2018	spp	2012	2018	spp	2012	2018	Spp	2012	2018	spp	2012	2018
pethan	7.3	10.6773	8.6	13.8033	4	4	0			karada		4.1	gammalu	3	27	thora	14	109	naththasuriya	40	10
siyabala	26.8	291.305	27.4	307.882						karada		3.4							mana	25	0
pethan	9.3	16.4086	10.7	23.5554						nelli		2.8
ketakela	32	450.729	32.8	478.418						karanda		3.3
damunu	15.4	66.4305	16.5	80.667						nelli		3
pethan	7.3	10.6773	8.6	13.8033						nelli		3.2
damunu	11	25.4228	12.9	40.0023						ginisiriya	4.9
pethan	6.7	9.98528	7.9	11.8434						gaduba	4.6
ketakela	24.5	232.151	25.8	264.73						gaduba	3.8
siyabala	8.4	13.1775	9.3	16.4086						hulanhik	4.1
damunu	10.7	23.5554	11.5	28.7985
siyabala	48.2	1175.72	48.7	1203.6
siyabala		2326.24	5.3	10.2147
damunu			5.2	10.3299
				2504.05

## Sheet: Sheet8
12.6m					stump		bush			3m (1.5>5)			3m (30>1.5)			3m (30<)			Inasive spp
tree	DBh (2012)	biomass 2012	dbh (2018)	biomass 2019	2012	2018	spp	2012	2018	spp	2012	2018	spp	2012	2018	Spp	2012	2018	spp	2012	2018
welan	24.3	227.336	25	244.418	6	6	0	0	0	welan	2.5	2.9	gammalu	3	18	hulanthala	16	64	lantana	30	10
ketkela	31.7	440.564	32.4	464.468						welan	1.7	2.2							mana	40	30
thelabu	12.6	37.3842	13.5	45.5943						nelli	2.4	2.9
ketkela	14.5	55.968	15.6	68.9004						nelli	1.5	1.8
seru	5.6	9.94824	6.3	9.7874						nelli		2.6
thelabu	13	40.9014	13.8	48.5681						nelli		4.6
seru	6.8	10.0677	7.6	11.2011						kuratiya	4.6
seru	7.3	10.6773	8.1	12.3375						nelli	4.8
seru	5.8	9.83642	6.8	10.0677
		842.683		915.343

## Sheet: Sheet9
12.6m					stump		bush			3m (1.5>5)			3m (30>1.5)			3m (30<)			Inasive spp
tree	DBh (2012)	biomass 2012	dbh (2018)	biomass 2019	2012	2018	spp	2012	2018	spp	2012	2018	spp	2012	2018	Spp	2012	2018	spp	2012	2018
seru	11.6	29.5132	12.7	38.2437	1	1	0			welan	4.3	4.8	welan	7	13	thora	10	56	lantana	10	2
ipil	6.3	9.7874	7.5	11.0133						mora	2.6	3.9							mana	55	15
kohomba	17.4	93.5005	18.9	117.261						milla	4.9
ipil	6.7	9.98528	8.4	13.1775						gongottu	4.8	0
ketakela	8.9	14.8408	9.5	17.2715						karawala kebilla	2.4	3.9
seru	12.4	35.7046	13.7	47.5637						karawaakebia	4.8
seru	8.4	13.1775	9.6	17.7227						nelli		2.8
ipil	9.1	15.5984	10.4	21.8066						nelli		2.6
ketakela	23.4	206.323	24.8	239.472						nelli		2.9
demata	8.4	13.1775	9.7	18.1871						nelli		3.2
demata	9.7	18.1871	11.3	27.4087
penela	5.6	9.94824	7.4	10.8387
demata	11.4	28.097	12.8	39.1164
ipil	11	25.4228	12.4	35.7046
hik	10.4	21.8066	12.5	36.5378
hik	25.9	267.328	27.3	305.086
kohomba	12	32.5035	13.6	46.5724
kohomba	9.6	17.7227	11.3	27.4087
ipil	5.7	9.88574	7.2	10.529
ipil		872.51	5.3	10.2147
ipil			5.8	9.83642
ipil			5.4	10.1127
				1111.09

## Sheet: Sheet10
12.6m					stump		bush			3m (1.5>5)			3m (30>1.5)			3m (30<)			Inasive spp
tree	DBh (2012)	biomass 2012	dbh (2018)	biomass 2019	2012	2018	spp	2012	2018	spp	2012	2018	spp	2012	2018	Spp	2012	2018	spp	2012	2018
teak	10.5	22.3764	11.7	30.241	4		0			gammalu	4		welan	4	12	balunaguta	8	81	lantana	30	0
ipil	8.4	13.1775	10.3	21.25						welan	3.5	4.8
teak	11.3	27.4087	12.7	38.2437						hulanhik	3.8
kukuruman	7.8	11.6161	9.2	15.9969						nelli		4.6
kohomba	23.2	201.798	24.5	232.151						nelli		3.6
demata	8.4	13.1775	9.5	17.2715						karanda		3
demata	11.2	26.7336	12.5	36.5378						nelli		3.1
demata	7	10.272	8.5	13.4838
demata	7.3	10.6773	8.6	13.8033
ipil	5.4	10.1127	7.3	10.6773
ipil	6.4	9.81712	8.2	12.6043
ipil	6	9.7773	8.1	12.3375
ipil	5.4	10.1127	7.3	10.6773
ipil	5.5	10.0239	7.3	10.6773
ipil	5.4	10.1127	7.1	10.3939
demata	11	25.4228	12.6	37.3842
kohomba	6.7	9.98528	7.4	10.8387
kohomba	6.7	9.98528	7.6	11.2011
nuga	18.6	112.271	19.7	131.145
karakola	6.5	9.86	7.2	10.529
ipil	12	32.5035	14.3	53.7879
ipil		597.222	5.2	10.3299
ipil			6	9.7773
				761.339
