# Supplementary material for: Impact of community-based forest restoration on stand structural attributes, aboveground biomass and carbon stock compared to state-managed forests in tropical ecosystems of Sri Lanka
Source: PeerJ journal article supplement (doi:10.7717/peerj.18176), 2024-09-26
Supplement: State_and_community_managed_forests_Raw_data.zip [file walasgala state.xlsx]

## Sheet: Sheet1
12.6m					stump		bush			3m (1.5>5)			3m (30>1.5)			3m (30<)			Inasive spp
tree	DBh (2012)	biomass 2012	dbh (2018)	biomass 2019	2012	2018	spp	2012	2018	spp	2012	2018	spp	2012	2018	Spp	2012	2018	spp	2012	2018
dunumadala	22	175.756	23.8	215.531	3	0	indi	2		nelli		3.8	podisinghomaran	3	12	Balunaguta	25	46	lantana	0.08	0
dunumadala	5	10.5998	7.1	10.3939						nelli		4.1							naththa suriya	0.07	7
katakela	10.5	22.3764	12.2	34.0777						nelli		2.8							mana	0.3	10
dunumadala	10	19.6593	11.8	30.982						nelli		3.8							gini grass	0.12	0
dunumadala	16.5	80.667	17.6	96.4973						nelli		3.2							podisinghomaran	0.03	0
thelabu	22.5	186.377	23.8	215.531						ginisapu		4.8
thelabu	47	1110.16	47.8	1153.66
unknown	7.2	10.529	9.1	15.5984
unknown	7	10.272	8.8	14.4818
hik	14.5	55.968	15.4	66.4305
hik	20	136.568	21.6	167.497
mahathabala	8	12.0839	9.4	16.8335
mhathabala	7	10.272	8.3	12.8843
dunumadala	32	450.729	33.6	506.949
teak	21	155.504	0	0
kon	22.3	182.089	23.4	206.323
dunumadala	23	197.326	24.3	227.336
thelabu	8	12.0839	9.4	16.8335
thelabu	11	25.4228	12.8	39.1164
dunumadala	12	32.5035	13.6	46.5724
dunumadala	11.5	28.7985	12.8	39.1164
dunumadala	8	12.0839	0	0
hik	20	136.568	21.6	167.497
karakola	10.5	22.3764	12.4	35.7046
dunumadala	22	175.756	24.1	222.575
dunumadala	6.5	9.86	7.8	11.6161
dunumadala	18	102.649	19.6	129.363
dunumadala	14	50.6165	15.7	70.1551
kukuruman	15.5	67.6589	17.3	92.0219
katupila	11	25.4228	12.6	37.3842
		3528.74		3898.96

## Sheet: Sheet2
12.6m					stump		bush			3m (1.5>5)			3m (30>1.5)			3m (30<)			Inasive spp
tree	DBh (2012)	biomass2012	dbh (2018)	biomass 2019	2012	2018	spp	2012	2018	spp	2012	2018	spp	2012	2018	Spp	2012	2018	spp	2012	2018
ipil	15.5	67.6589	17.8	99.5467	0		0			nelli		3.6	gammalu	2	14	gini grass	1	85	naththa S	12	10
ipil	17.5	94.9923	19.7	131.145						nelli		3.2							lanthana	7	2
katakela	52	1395.84	52.8	1444.6						nelli		1.9							Gini grass	65	0
seru	12.5	36.5378	13.9	49.5857						nelli		2.6
seru	16.5	80.667	18.2	105.804						nelli		3.6
kohomba	10	19.6593	11.5	28.7985						nelli		3.1
teak	34.5	540.054	35.6	581.965						welan	4.2
teak	10.5	22.3764	12	32.5035						welan	3.6	4.8
thelabu	30	385.197	30.8	410.778
demata	20	136.568	21.3	161.441
demata	6	9.7773	7.6	11.2011
demata	5.5	10.0239	7	10.272
demata	5.5	10.0239	6.9	10.1633
kahapenala	7	10.272	8.3	12.8843
karakola	8	12.0839	8.7	14.136
ipil	13	40.9014	14.3	53.7879
damunu	7	10.272	8.4	13.1775
damunu	10.2	20.7066	11.5	28.7985
damunu	34.5	540.054	35.6	581.965
damunu	13.5	45.5943	13.7	47.5637
igini	8.5	13.4838	9.3	16.4086
igini	5.5	10.0239	6.4	9.81712
ipil	5.5	10.0239	7.8	11.6161
ipil		3522.79	5.1	10.4583
ipil			5.1	10.4583
				3888.87

## Sheet: Sheet3
12.6m					stump		bush			3m (1.5>5)			3m (30>1.5)			3m (30<)			Inasive spp
tree	DBh (2012)	biomass 2012	dbh (2018)	bioamass 2019	2012	2018	spp	2012	2018	spp	2012	2018	spp	2012	2018	Spp	2012	2018	spp	2012	2018
dunumadala	12.8	39.1164	14.3	53.7879	0		0			nelli		2.1		0	23	hulan thala	2	78	gini grass	0.7	0
gongotu	5.8	9.83642	7.3	10.6773						nelli		3.2							naththa suriya	0.2	20
gongotu	17	87.665	18.7	113.921						nelli		2.7							rila thana		0
gongotu	17.2	90.5564	19	118.95						nelli		3.5							balu naguta	3	2
gongotu	7.1	10.3939	8.9	14.8408						ginisapu		4.1							lantana	2	0
gongotu	5	10.5998	7.1	10.3939						nelli		3.4
damunu	12	32.5035	13.6	46.5724						damba	4.6
damunu	31	417.305	32.7	474.911
katakela	23.5	208.605	24.9	241.938
gongotu	19	118.95	21.2	159.449
gongotu	5.5	10.0239	7.2	10.529
damunu	28	324.934	29.4	366.565
damunu	16	73.9983	17.5	94.9923
gongotu	5.5	10.0239	7.3	10.6773
kahapenala	10.7	23.5554	12.4	35.7046
gongotu	7	10.272	8.6	13.8033
gongotu	8.5	13.4838	10.3	21.25
gongotu	9	15.213	10.7	23.5554
gongotu	6.4	9.81712	7.9	11.8434
siyabala	27	296.778	28.4	336.565
ahala	17	87.665	18.2	105.804
siyabala	14.5	55.968	15.9	72.7041
pethan	25.8	264.73	27.3	305.086
kuduhakassa	8.5	13.4838	10.3	21.25
kuduhakassa	6	9.7773	7.8	11.6161
pethan	12.6	37.3842	14.2	52.7176
pethan	12.8	39.1164	14.5	55.968
pethan		2321.76	6.2	9.77086
pethan			6	9.7773
gongotu			5.3	10.2147
				2825.84

## Sheet: Sheet4
12.6m					stump		bush			3m (1.5>5)			3m (30>1.5)			3m (30<)			Inasive spp
tree	DBh (2012)	biomass 2012	dbh (2018)	biomass 2019	2012	2018	spp	2012	2018	spp	2012	2018	spp	2012	2018	Spp	2012	2018	spp	2012	2018
katakela	18.6	112.271	19.8	132.939	5	5				gammalu	2.5		bowitiya	8	12	thora	6	98	lantana	6	0
nolaba	5.7	9.88574	7.2	10.529						karanda		1.9							mana	35	10
nolaba	6.4	9.81712	8.2	12.6043						nelli	4.6								gini grass	20	0
nolaba	8.3	12.8843	9.8	18.6647						nelli		3.8							naththasuriya	10	5
welan	47.4	1131.81	48.7	1203.6						nelli		2.9
kon	22.4	184.226	23.9	217.866						nelli		3.6
kon	52.3	1414.02	53.2	1469.3						nelli		2.6
nolaba	7.5	11.0133	9.1	15.5984						nelli		4.1
nolaba	9.7	18.1871	11.4	28.097						nelli		3.9
welan	25.8	264.73	27	296.778						karanda		3.1
welan	28.6	342.46	29.7	375.822						nelli		4.7
nolaba	18.3	107.401	19.8	132.939
nolaba	11.4	28.097	13.4	44.6294
kukuruman	6.3	9.7874	7.7	11.402
nolaba	11	25.4228	12.8	39.1164
katakela	24.8	239.472	26	269.939
kon	27	296.778	27.8	319.197
kon	7.4	10.8387	8.6	13.8033
nolaba	8.6	13.8033	10	19.6593
nolaba	7.5	11.0133	9.1	15.5984
katakela	18.4	109.011	19.8	132.939
nolaba		4362.93	6.4	9.81712
nolaba			5.7	9.88574
kon			5.3	10.2147
				4810.93

## Sheet: Sheet5
12.6m					stump		bush			3m (1.5>5)			3m (30>1.5)			3m (30<)			Inasive spp
tree	DBh (2012)	Biomass 2012	dbh (2018)	Biomass 2019	2012	2018	spp	2012	2018	spp	2012	2018	spp	2012	2018	Spp	2012	2018	spp	2012	2018
kukuruman	16.3	77.96	18	102.649	0		indi	2		nelli	3.7		pera	6	18	Bowitiya	8	102	Lantana	50	0
ketakela	24.1	222.575	25.8	264.73						ginisiriya	3.2								Mana	20	5
nolaba	6.3	9.7874	8.2	12.6043						karanda		2.6							Gini grass	10	0
nolaba	6.4	9.81712	8.2	12.6043						nelli		2.1
welan	7.8	11.6161	9.2	15.9969						nelli		1.8
welan	11	25.4228	12.4	35.7046						nelli		2.3
nolaba	8.4	13.1775	9.8	18.6647						nelli		3.6
kon	13.4	44.6294	14.7	58.2008						ginisiriya		4.1
nolaba	6.7	9.98528	7.8	11.6161						batu		1.8
kon	26.5	283.194	27.4	307.882
welan	11	25.4228	12.4	35.7046
welan	6.2	9.77086	7.8	11.6161
karakola	5.4	10.1127	6.8	10.0677
hinguruwel	6.2	9.77086	6.8	10.0677
nolaba	8.1	12.3375	9.3	16.4086
ahal	7.4	10.8387	8.6	13.8033
ketakela	17.3	92.0219	18.8	115.584
ketakela	10.3	21.25	11.4	28.097
welan	19.3	124.097	21.4	163.447
damunu	17.3	92.0219	18.7	113.921
damunu	11.3	27.4087	12.8	39.1164
damunu	16.3	77.96	17.9	101.091
welan	8.5	13.4838	9.6	17.7227
welan	11.5	28.7985	12.8	39.1164
mahathambala	7.4	10.8387	8.3	12.8843
welan	9.8	18.6647	11.3	27.4087
gongotu	7.3	10.6773	8.8	14.4818
kolon	37.2	645.771	38.2	687.363
damunu	16.5	80.667	18.2	105.804
kukuruman	7.3	10.6773	8.6	13.8033
nolaba	5.6	9.94824	7.2	10.529
nolaba	6	9.7773	7.8	11.6161
nolaba	6	9.7773	7.6	11.2011
ketakela	10.7	23.5554	11.8	30.982
nolaba	7	10.272	8.2	12.6043
nolaba	8.4	13.1775	9.8	18.6647
welan	7.8	11.6161	9.2	15.9969
welan	19	118.95	21.3	161.441
ketakela	8.3	12.8843	9.8	18.6647
kon	11.3	27.4087	12.2	34.0777
kon	7.9	11.8434	9.2	15.9969
nolaba		2299.97	5.3	10.2147
				2770.15

## Sheet: Sheet6
12.6m					stump		bush			3m (1.5>5)			3m (30>1.5)			3m (30<)			Inasive spp
tree	DBh (2012)	biomass 2012	dbh (2018)	biomass 2019	2012	2018	spp	2012	2018	spp	2012	2018	spp	2012	2018	Spp	2012	2018	spp	2012	2018
welan	7.3	10.6773	8.9	14.8408	0		indi	1		nelli	4.2		0	21	41	podisingnomaran	10	62	ginigrass	14	5
Kon	53	1456.92	53.9	1513.02						nelli		3.3							rila thana	56	5
welan	17.3	92.0219	19.2	122.368						nelli		1.9							lantana	12	2
nolaba	8.2	12.6043	10.2	20.7066						nelli		2.4							podisinm	3	0
nolaba	7.2	10.529	8.9	14.8408						nelli		4.6							illuk	7	0
kon	18.4	109.011	19.8	132.939						karanda		2.6
welan	21	155.504	22.3	182.089						thibbatu		1.8
nolaba	7	10.272	9.2	15.9969						hulanhik	4.2
nolaba	13.2	42.739	14.7	58.2008						hulanhik	3.8
kon	13	40.9014	14.8	59.337
welan	8.3	12.8843	9.6	17.7227
welan	44.2	964.572	45.4	1025.7
damunu	17	87.665	18.9	117.261
damunu	21.3	161.441	23.5	208.605
nolaba	7.2	10.529	8.8	14.4818
katakela	11.8	30.982	13.2	42.739
welan	30.7	407.534	31.9	447.328
ahala	7.3	10.6773	9.2	15.9969
nolaba	9.2	15.9969	11.1	26.0716
welan		3643.46	5.2	10.3299
nolaba			6.2	9.77086
nolaba			5	10.5998
				4080.95

## Sheet: Sheet7
12.6m					stump		bush			3m (1.5>5)			3m (30>1.5)			3m (30<)			Inasive spp
tree	DBh (2012)	biomass 2012	DBH 2018	biomass 2019	2012	2018	spp	2012	2018	spp	2012	2018	spp	2012	2018	Spp	2012	2018	spp	2012	2018
pethan	11.4	28.097	13.4	44.6294	4	4	0			karada		4.1	gammalu	3	27	thora	14	109	naththasuriya	40	10
pethan	10.3	21.25	12.6	37.3842						karada		3.4							mana	25	0
thelabu	12	32.5035	13.4	44.6294						nelli		2.8
mahathambala	6.8	10.0677	8.3	12.8843						karanda		3.3
mahathambala	8.3	12.8843	9.8	18.6647						nelli		3
ada kirala	10.5	22.3764	12.3	34.8846						nelli		3.2
gal kaara	8.9	14.8408	10.2	20.7066						ginisiriya	4.9
gal kaara	9.2	15.9969	10.8	24.1647						gaduba	4.6
pethan	6.2	9.77086	7.8	11.6161						gaduba	3.8
pethan	10.3	21.25	11.9	31.7362						hulanhik	4.1
hama	18.9	117.261	20.3	142.111
hama	38.6	704.368	39.2	730.271
hama	11	25.4228	12.7	38.2437
pethan	6.3	9.7874	7.6	11.2011
pethan	12.4	35.7046	13.2	42.739
pethan	6.8	10.0677	8	12.0839
pethan	8	12.0839	9.5	17.2715
hik	31.6	437.202	33.8	514.213
hik	42	857.422	43.4	924.871
pethan	5.8	9.83642	7.3	10.6773
hik	26	269.939	27.4	307.882
pethan	5.5	10.0239	6.7	9.98528
pethan	6.3	9.7874	8.2	12.6043
pethan	6.2	9.77086	7.8	11.6161
gal kaara	10	19.6593	11.7	30.241
gal kaara	10.4	21.8066	11.8	30.982
karakola	8.2	12.6043	9.4	16.8335
pethan	6	9.7773	7.5	11.0133
thelabu	9.8	18.6647	11	25.4228
pethan		2790.23	5.4	10.1127
				3191.68

## Sheet: Sheet8
12.6m					stump		bush			3m (1.5>5)			3m (30>1.5)			3m (30<)			Inasive spp
tree	DBh (2012)	biomass 2012	dbh (2018)	biomass 2019	2012	2018	spp	2012	2018	spp	2012	2018	spp	2012	2018	Spp	2012	2018	spp	2012	2018
damunu	39.5	743.4	40.1	770.015	6	6	0	0	0	welan	2.5	2.9	gammalu	3	18	hulanthala	16	64	lantana	30	10
damunu	32	450.729	33.1	489.018						welan	1.7	2.2							mana	40	30
ketakala	51.2	1347.92	51.8	1383.78						nelli	2.4	2.9
petha	10.3	21.25	11.2	26.7336						nelli	1.5	1.8
petha	7.8	11.6161	8.3	12.8843						nelli		2.6
petha	6.9	10.1633	7.7	11.402						nelli		4.6
galkera	11	25.4228	11.7	30.241						kuratiya	4.6
petha	8.6	13.8033	0	0						nelli	4.8
damunu	41.4	829.306	42.8	895.648
ketakala	15	61.6488	15.8	71.423
petha	8.7	14.136	9.6	17.7227
petha	7	10.272	8.4	13.1775
petha		3539.66	5.3	10.2147
petha			5	10.5998
damunu			5.6	9.94824
				3752.8

## Sheet: Sheet9
12.6m					stump		bush			3m (1.5>5)			3m (30>1.5)			3m (30<)			Inasive spp
tree	DBh (2012)	biomass 2012	dbh (2018)	biomass 2019	2012	2018	spp	2012	2018	spp	2012	2018	spp	2012	2018	Spp	2012	2018	spp	2012	2018
pethan	7.5	11.0133	8.6	13.8033	1	1	0			welan	4.3	4.8	welan	7	13	thora	10	56	lantana	10	2
pethan	9	15.213	10.2	20.7066						mora	2.6	3.9							mana	55	15
weera	53.2	1469.3	53.6	1494.21						milla	4.9
pethan	17.1	89.1041	18.2	105.804						gongottu	4.8	0
gongotu	11	25.4228	12.2	34.0777						karawala kebilla	2.4	3.9
hik	31.3	427.194	31.8	443.939						karawaakebia	4.8
hik	34.6	543.798	35.2	566.54						nelli		2.8
pethan	12.3	34.8846	12.8	39.1164						nelli		2.6
pethan	10	19.6593	10.8	24.1647						nelli		2.9
pethan	28.4	336.565	29.1	357.427						nelli		3.2
damunu	44.2	964.572	45.1	1010.24
damunu	28.7	345.427	29.3	363.506
damunu	9.2	15.9969	10.1	20.1764
pethan	11	25.4228	0	34.4703
pethan	11.4	28.097	0	34.4703
welmidi	5.5	10.0239	6.4	9.81712
mahathabala	7.3	10.6773	8	12.0839
mahathabala	7.5	11.0133	8.2	12.6043
pethan		4383.38	5.2	10.3299
				4607.48

## Sheet: Sheet10
12.6m					stump		bush			3m (1.5>5)			3m (30>1.5)			3m (30<)			Inasive spp
tree	DBh (2012)	Biomass 2012	dbh (2018)	biomass 2019	2012	2018	spp	2012	2018	spp	2012	2018	spp	2012	2018	Spp	2012	2018	spp	2012	2018
welan	21.3	161.441	21.8	171.601	4		0			gammalu	4		welan	4	12	balunaguta	8	81	lantana	30	0
welan	27	296.778	28.2	330.723						welan	3.5	4.8
welan	14.6	57.0778	15.4	66.4305						hulanhik	3.8
weliwenna	9	15.213	10.4	21.8066						nelli		4.6
seru	7	10.272	8.2	12.6043						nelli		3.6
welan	9.3	16.4086	10.1	20.1764						karanda		3
weliwenna	6.7	9.98528	7.3	10.6773						nelli		3.1
weliwenna	9	15.213	9.6	17.7227
seru	9	15.213	10.3	21.25
welan	21.2	159.449	22.1	177.854
welan	7.3	10.6773	8.4	13.1775
ahala	13.2	42.739	4.2	12.2062
seru	14.2	52.7176	15.3	65.2153
seru	11.6	29.5132	12.8	39.1164
welan	6.5	9.86	7.4	10.8387
weliwenna	13.2	42.739	14.4	54.8714
welan	41.3	824.667	42.2	866.9
weliwenna	14.3	53.7879	15.6	68.9004
makull	18.7	113.921	19.4	125.839
seru	9.4	16.8335	10.6	22.9593
makull	20	136.568	21.7	169.542
milla	27.3	305.086	28.4	336.565
milla	32.4	464.468	33.6	506.949
milla	14	50.6165	15.3	65.2153
welan	11.4	28.097	12.8	39.1164
welan	16.7	83.4267	18.3	107.401
welan	14.8	59.337	15.6	68.9004
seru	8.3	12.8843	9.2	15.9969
milla	38.6	704.368	39.7	752.219
milla	8.4	13.1775	9.8	18.6647
weliwenna	7.3	10.6773	8.7	14.136
welan	10	19.6593	11.2	26.7336
makull	22.8	192.907	23.6	210.901
		4035.78		4463.21
