# Supplementary material for: Impact of community-based forest restoration on stand structural attributes, aboveground biomass and carbon stock compared to state-managed forests in tropical ecosystems of Sri Lanka
Source: PeerJ journal article supplement (doi:10.7717/peerj.18176), 2024-09-26
Supplement: State_and_community_managed_forests_Raw_data.zip [file wegala commuinty managed(1).xlsx]

## Sheet: Sheet1
12.6m					stump		bush			3m (1.5>5)			3m (30>1.5)			3m (30<)			Inasive spp
tree	DBh (2012)	biomass 2012	dbh (2018)	Biomass 2019	2012	2018	spp	2012	2018	spp	2012	2018	spp	2012	2018	Spp	2012	2018	spp	2012	2018
nelli	22.5	186.377	23.9	217.866	3		0			0			kahata	1.2		lantana	6		mana	100
nelli	29	354.407	29.8	378.934												hulanthala	3
nelli	17	87.665	18.2	105.804
damunu	13	40.9014	15.2	64.0133
kahata	25.2	249.417	26.9	294.035
pines	38	678.939	40.1	770.015
thala	12.1	33.284	14.3	53.7879
katakela	12.4	35.7046	15.2	64.0133
nelli		1666.69	6.3	9.7874
nelli			5.3	10.2147
gammalu			5.2	10.3299
damunu			5.3	10.2147
				1989.01

## Sheet: Sheet2
12.6m					stump		bush			3m (1.5>5)			3m (30>1.5)			3m (30<)			Inasive spp
tree	DBh (2012)	biomass 2012	dbh (2018)	biomass 2019	2012	2018	spp	2012	2018	spp	2012	2018	spp	2012	2018	Spp	2012	2018	spp	2012	2018
damunu	28.4	336.565	30.1	388.349	6	6	0	0	0	kuratiya	4.2		ketakea	3		lantana	6		latana	20
kuratiya	30.3	394.691	31.6	437.202						ketakela	1.8		Lantana	8		hulanthala	3		mana	90
damunu	18.3	107.401	20.2	140.25												thora	4
katakela	12.8	39.1164	14.5	55.968
damunu		877.774	6.4	9.81712
nelli			5.3	10.2147
katakela			5.9	9.80028
				1051.6

## Sheet: Sheet3
12.6m					stump		bush			3m (1.5>5)			3m (30>1.5)			3m (30<)			Inasive spp
tree	DBh (2012)	biomass 2012	dbh (2018)	biomass 2019	2012	2018	spp	2012	2018	spp	2012	2018	spp	2012	2018	Spp	2012	2018	spp	2012	2018
damunu	17.2	90.5564	18.9	117.261									podisingnomaran	6					mana	100
damunu	10.6	22.9593	12.3	34.8846
damunu		113.516	6.4	9.81712
gansuriya			5.2	10.3299
				172.292

## Sheet: Sheet4
12.6m					stump		bush			3m (1.5>5)			3m (30>1.5)			3m (30<)			Inasive spp
tree	DBh (2012)	biomass 2012	dbh (2018)	Biomass 2019	2012	2018	spp	2012	2018	spp	2012	2018	spp	2012	2018	Spp	2012	2018	spp	2012	2018
akeshia	48.3	1181.27	49.7	1260.34	4		0			0			0			0			mana	1
kahata	14.9	60.4863	16.1	75.3057
thala	10.3	21.25	12.1	33.284
thala		1263.01	5.2	10.3299
				1379.26

## Sheet: Sheet5
12.6m					stump		bush			3m (1.5>5)			3m (30>1.5)			3m (30<)			Inasive spp
tree	DBh (2012)	Biomass2012	dbh (2018)	biomass 2019	2012	2018	spp	2012	2018	spp	2012	2018	spp	2012	2018	Spp	2012	2018	spp	2012	2018
akeshiya	20.1	138.403	22.1	177.854	4		0			kahakona	4		balunaguta	6		balunaguta	14		lantana	30
akeshiya	19.8	132.939	21.3	161.441						kahakona	3.5		lantana	3
akeshiya	25	244.418	27.2	302.304									nolaba	1
akeshiya	18	102.649	19.1	120.653
pines	38	678.939	40.1	770.015
kahakona	7	10.272	9.2	15.9969
kahakona	6	9.7773	8.4	13.1775
pines	24	220.213	26.2	275.202
akeshiya	25.5	257.014	27.4	307.882
akeshiya	15.3	65.2153	17.4	93.5005
akeshiya	15.7	70.1551	17.1	89.1041
kahakona	18.4	109.011	20.1	138.403
akeshiya	16.9	86.2391	18.2	105.804
akeshiya	22.4	184.226	24.1	222.575
akeshiya	25.4	254.468	27.2	302.304
akeshiya	27.4	307.882	29.1	357.427
akeshiya	28.8	348.407	30.1	388.349
attikka	9.4	16.8335	10.9	24.7872
attikka	20.5	145.871	22.6	188.54
attikka	21.3	161.441	23.6	210.901
akeshiya	42.4	876.43	43.9	949.585
unknown	7.3	10.6773	9.1	15.5984
kahakona	6.8	10.0677	8.2	12.6043
kahakona	7.4	10.8387	8.9	14.8408
kahakona	17.5	94.9923	19.6	129.363
kahata		4547.38	5.4	10.1127
kahakona			6.6	9.91606
kahakona			5.9	9.80028
karaw			7.6	11.2011
attikka			5.7	9.88574
				5439.13

## Sheet: Sheet6
12.6m					stump		bush			3m (1.5>5)			3m (30>1.5)			3m (30<)			Inasive spp
tree	DBh (2012)	Biomass 2012	dbh (2018)	Biomass 2019	2012	2018	spp	2012	2018	spp	2012	2018	spp	2012	2018	Spp	2012	2018	spp	2012	2018
akeshiya	9.4	16.8335	11.2	26.7336	1		0			milla	4.3		kahakona	7		lantana	10		lantana	30
akeshiya	10.3	21.25	12.3	34.8846						bo	2.6								mana	70
akeshiya	5.7	9.88574	7.2	10.529
akeshiya	9.3	16.4086	11.2	26.7336
akeshiya	5.5	10.0239	7.3	10.6773
akeshiya	6.1	9.7675	8.2	12.6043
akeshiya	5.5	10.0239	7.3	10.6773
damba	7.8	11.6161	9.2	15.9969
bo	14.1	51.6605	15.9	72.7041
bo	6.9	10.1633	8.7	14.136
bo	7.1	10.3939	9.4	16.8335
bo	7.5	11.0133	9.3	16.4086
milla	6	9.7773	7.9	11.8434
milla	7.4	10.8387	9.2	15.9969
milla		209.656	5.6	9.94824
akeshiya			6.1	9.7675
akeshiya			5.8	9.83642
welan			5.3	10.2147
				336.526

## Sheet: Sheet7
12.6m					stump		bush			3m (1.5>5)			3m (30>1.5)			3m (30<)			Inasive spp
tree	DBh (2012)	biomass 2012	dbh (2018)	biomass 2019	2012	2018	spp	2012	2018	spp	2012	2018	spp	2012	2018	Spp	2012	2018	spp	2012	2018
kahakona	12.5	36.5378	13.2	42.739	4	4	0			kudu daula	4.1	4.5	kudu daula	12	18	thora	24	38	lantana	2	0
damba	26.1	272.564	27.3	305.086						kudu daula	3.6	3.9
kahakona	11.7	30.241	13.3	43.6776						kudu daula	2.4	2.9
ankenda	34.5	540.054	35.7	585.854						pera	1.8	2.3
mora	54.1	1525.64	54.9	1576.61						pera	1.8	2.2
mora	36	597.6	36.8	629.503						ankenda	2.4	2.7
mora	36.7	625.469	37.3	649.871
pera	24.5	232.151	25.3	251.936
kahakona	10.5	22.3764	11.9	31.7362
bhukenda	26.9	294.035	28.3	333.638
kahakona	8.1	12.3375	10.2	20.7066
kudu daula	20.4	143.984	21.1	157.47
kudu daula	11.4	28.097	12.1	33.284
nolaba	5.7	9.88574	6.9	10.1633
nolaba	5.2	10.3299	7.4	10.8387
nolaba	6.4	9.81712	7.8	11.6161
mora		4391.12	5.7	9.88574
kahakona			5.2	10.3299
kudu daula			5.4	10.1127
				4725.06

## Sheet: Sheet8
12.6m					stump		bush			3m (1.5>5)			3m (30>1.5)			3m (30<)			Inasive spp
tree	DBh (2012)	biomass 2012	dbh (2018)	biomass 2019	2012	2018	spp	2012	2018	spp	2012	2018	spp	2012	2018	Spp	2012	2018	spp	2012	2018
kudu daula	8	12.0839	9.4	16.8335	6	6	0			kahakona	2.8	3.2	kahakona	6	7	mana	19		mana	45	25
welan	9.7	18.1871	10.8	24.1647						kahakona	2.2	2.5
welan	9.9	19.1554	10.7	23.5554						kahakona	1.8	2.3
kahakona	6	9.7773	8.4	13.1775						welan	3.2	3.7
mora	10.6	22.9593	11.3	27.4087						kahakona	1.9	2.3
bhukenda	24.4	229.737	25.2	249.417						kuratiya	1.6	2.2
pinus	36.8	629.503	37.7	666.402
pinus	40.2	774.497	40.9	806.239
Himbutu	5.4	10.1127	5.8	9.83642
kuratiya	6.1	9.7675	7.4	10.8387
Bomi	7.2	10.529	8.5	13.4838
kahakona		1746.31	5.8	9.83642
welan			5.3	10.2147
kahakona			5.4	10.1127
kahakona			5.1	10.4583
				1901.98

## Sheet: Sheet9
12.6m					stump		bush			3m (1.5>5)			3m (30>1.5)			3m (30<)			Inasive spp
tree	DBh (2012)	biomass 2012	dbh (2018)	biomass 2019	2012	2018	spp	2012	2018	spp	2012	2018	spp	2012	2018	Spp	2012	2018	spp	2012	2018
kahata	36.8	629.503	37.8	670.568	6	6	0	0	0	welan	2.5	2.9	lantana	14	18	hulanthala	16	14	lantana	30	40
welan	32.9	481.938	33.9	517.865						welan	1.7	2.2							mana	40	40
bo	17	87.665	18.3	107.401						kuratiya	2.4	2.9
welan		1199.11	5.3	10.2147						kuratiya	1.5	1.8
welan			5.2	10.3299
welan			5.2	10.3299
				1326.71

## Sheet: Sheet10
12.6m					stump		bush			3m (1.5>5)			3m (30>1.5)			3m (30<)			Inasive spp
tree	DBh (2012)	biomass 2012	dbh (2018)	biomass 2019	2012	2018	spp	2012	2018	spp	2012	2018	spp	2012	2018	Spp	2012	2018	spp	2012	2018
kahakona	6.3	9.7874	8.6	13.8033	4	4	0			kahakona	2.3	2.6				thora	14		naththasuriya	40	60
kahakona	5.8	9.83642	7.2	10.529						kahakona	1.8	2.1							mana	5	10
ginisiriya	11.8	30.982	13.1	41.8136						kappetiya	1.2	1.4
ginisiriya	5.3	10.2147	7.7	11.402
ginisiriya	5.2	10.3299	7.7	11.402
baththik	40.6	792.556	41.2	820.04
baththik		863.706	5.2	10.3299
kahakona			5.7	9.88574
				929.205
