# Supplementary material for: Impact of community-based forest restoration on stand structural attributes, aboveground biomass and carbon stock compared to state-managed forests in tropical ecosystems of Sri Lanka
Source: PeerJ journal article supplement (doi:10.7717/peerj.18176), 2024-09-26
Supplement: State_and_community_managed_forests_Raw_data.zip [file wegala state manage.xlsx]

## Sheet: Sheet1
12.6m					stump		bush			3m (1.5>5)			3m (30>1.5)			3m (30<)			Inasive spp
tree	DBh (2012)	biomass 2012	dbh (2018)	biomass 2019	2012	2018	spp	2012	2018	spp	2012	2018	spp	2012	2018	Spp	2012	2018	spp	2012	2018
milla	46.6	1088.73	47.7	1148.18	0	2	0			welan	2.6	3.6	yakinaran	5	9	yakinaran	10	10	lantana	40	60
weera	10.6	22.9593	12.1	33.284						unknown	2.2	3.3
unknown	39.1	725.921	41	810.826						unknown	2.2	3.1
unknown	9.7	18.1871	11.5	28.7985						tharana	1.6	2.1
weera	28.1	327.822	30.2	391.513						tharana	1.2	2
wal uguressa	10.7	23.5554	11.8	30.982						yakinaran	1.6	2
wal uguressa	9.4	16.8335	11.2	26.7336						tharana	2.1	2.8
tharana	9.2	15.9969	11.2	26.7336
damunu	38.3	691.594	40.4	783.5
wal uguressa	8.7	14.136	10.1	20.1764
wal uguressa	8.1	12.3375	9.8	18.6647
wal uguressa	9.1	15.5984	1	27.0618
burutha	37.7	666.402	38.6	704.368
milla	9.6	17.7227	11.4	28.097
milla	8.6	13.8033	10.2	20.7066
burutha	48.1	1170.19	51	1336.07
ginisiriya	12.1	33.284	14.6	57.0778
burutha	11.1	26.0716	12.8	39.1164
tharana	8.6	13.8033	10.3	21.25
tharana	9.7	18.1871	11.3	27.4087
tharana	5.6	9.94824	7.4	10.8387
burutha	11.2	26.7336	12.6	37.3842
burutha	10.1	20.1764	11.7	30.241
milla	10.1	20.1764	12.3	34.8846
burutha	10.2	20.7066	11.6	29.5132
milla		5030.88	5.4	10.1127
wal uguressa			5.2	10.3299
				5743.84

## Sheet: Sheet2
12.6m					stump		bush			3m (1.5>5)			3m (30>1.5)			3m (30<)			Inasive spp
tree	DBh (2012)	biomass 2012	dbh (2018)	biomass 2019	2012	2018	spp	2012	2018	spp	2012	2018	spp	2012	2018	Spp	2012	2018	spp	2012	2018
panakka	5.7	9.88574	7.1	10.3939						karuwala	4.6	4.9							Lantana	8
panakka	27.2	302.304	29.3	363.506						karuwala	4.2	4.8
kuratiya	13.6	46.5724								milla	4.1	4.7
panakka	6.6	9.91606	8.3	12.8843						karanda	4.7	5.7
ipil	6	9.7773	7.2	10.529						karanda	7.1	7.6
poromala	5.3	10.2147	7.1	10.3939
weera	54.6	1557.4	56.2	1661.25
panakka	26.2	275.202	27.4	307.882
panakka	8.3	12.8843	10.2	20.7066
panakka	6.2	9.77086	8.3	12.8843
ipil	6.5	9.86	8.1	12.3375
ipil	16.4	79.3069	17.8	99.5467
ipil	6.4	9.81712	7.6	11.2011
panakka	9.1	15.5984	11.3	27.4087
ipil	19.6	129.363	21.7	169.542
kuratiya	6.6	9.91606	7.8	11.6161
panakka	5.4	10.1127	7.3	10.6773
panakka	6.2	9.77086	8.4	13.1775
panakka	5.7	9.88574	7.4	10.8387
panakka	8.4	13.1775	10.2	20.7066
ipil	7.5	11.0133	9.1	15.5984
panakka	5.2	10.3299	7.3	10.6773
panakka	7.3	10.6773	9.2	15.9969
damunu	16.7	83.4267
panakka	7	10.272	8.9	14.8408
burutha	6.9	10.1633	8.2	12.6043
panakka		2676.62	5.4	10.1127
ipil			5.2	10.3299
				2887.64

## Sheet: Sheet3
12.6m					stump		bush			3m (1.5>5)			3m (30>1.5)			3m (30<)			Inasive spp
tree	DBh (2012)	biomass 2012	dbh (2018)	biomass 2019	2012	2018	spp	2012	2018	spp	2012	2018	spp	2012	2018	Spp	2012	2018	spp	2012	2018
ipil	12.5	36.5378	13.2	42.739	2		0			mal kera	1.6	2	damunu	4	9	ipil	12	11	lantana	10	25
bhukanda	19	118.95	21.3	161.441						mal kera	3.2	3.6							podisingnomaran	5	10
ipil	7.6	11.2011	9.2	15.9969						mal kera	4.6	5
ipil	6.5	9.86	8.2	12.6043						rathmal	2.7	2.9
damaniya	47.7	1148.18	48.3	1181.27						kuratiya	1.6	2.3
damaniya	15.7	70.1551	17.2	90.5564						rathmal	4.6	4.9
poromala	5.6	9.94824	7.8	11.6161						kuratiya	4.6	5.2
ipil	8	12.0839	9.7	18.1871						welan	4.6	5.1
unknown	8.2	12.6043	9.8	18.6647						ata thamburu	1.7	2
unknown	7.7	11.402	9.2	15.9969						kuratiya	2.1	2.6
kuratiya	6.1	9.7675	7.9	11.8434
walkera	5.7	9.88574	7.8	11.6161
kara	6.1	9.7675	8.2	12.6043
mal kera	5.7	9.88574	7.5	11.0133
unknown	7.2	10.529	9.1	15.5984
kukuruman	6.6	9.91606	8.4	13.1775
pathok	11.9	31.7362	12.5	36.5378
ipil	7.5	11.0133	8.9	14.8408
ipil	8.1	12.3375	9.9	19.1554
mal kera	5.7	9.88574	7.4	10.8387
kuratiya	6.4	9.81712	8.5	13.4838
yakinaran	10.1	20.1764	11.9	31.7362
welan	37.6	662.25	38.7	708.652
damaniya	15.6	68.9004	17.3	92.0219
ipil	8.5	13.4838	9.7	18.1871
ipil	8.4	13.1775	9.5	17.2715
ipil	10.4	21.8066	11.8	30.982
ipil	10.5	22.3764	11.8	30.982
ipil	12	32.5035	12.9	40.0023
damaniya	45.6	1036.08	47.2	1120.96
ipil	8.1	12.3375	9.8	18.6647
ipil	9.5	17.2715	10.8	24.1647
ipil	7.5	11.0133	8.3	12.8843
damaniya		3506.83	5.3	10.2147
				3896.51

## Sheet: Sheet4
12.6m					stump		bush			3m (1.5>5)			3m (30>1.5)			3m (30<)			Inasive spp
tree	DBh (2012)	biomass 2012	dbh (2018)	biomass 2019	2012	2018	spp	2012	2018	spp	2012	2018	spp	2012	2018	Spp	2012	2018	spp	2012	2018
Nolaba	7.6	11.2011	9.2	15.9969	2		0									lantana		45	lantana		25
idda	10	19.6593	12.3	34.8846															podisinghomaran		12
idda	14	50.6165	16.3	77.96
idda	10	19.6593	12.4	35.7046
idda	10.6	22.9593	12.8	39.1164
idda	11.6	29.5132	13.2	42.739
damunu	35	558.907	37.1	641.685
damunu	41.3	824.667	42.4	876.43
suduhandun	6.3	9.7874	8.1	12.3375
bhu sera	10	19.6593	12.7	38.2437
bhu sera	9.6	17.7227	11.8	30.982
bhu sera	6	9.7773	8.3	12.8843
bhu sera	5.6	9.94824	7.2	10.529
bhu sera	5.6	9.94824	7	10.272
Nolaba	10.6	22.9593	12.4	35.7046
Nolaba	29.6	372.723	31.4	430.517
Nolaba	5	10.5998	6.4	9.81712
Nolaba		2020.31	5.7	9.88574
				2365.69

## Sheet: Sheet5
12.6m					stump		bush			3m (1.5>5)			3m (30>1.5)			3m (30<)			Inasive spp
tree	DBh (2012)	biomass 2012	dbh (2018)	biomass 2019	2012	2018	spp	2012	2018	spp	2012	2018	spp	2012	2018	Spp	2012	2018	spp	2012	2018
sudu handun	5.1	10.4583	7.2	10.529	3		0									lantana		34	lantana		14
weera	20.2	140.25	22.2	179.965															podisingnomaran		11
baththik	9.1	15.5984	11.2	26.7336
nolaba	8.8	14.4818	10.3	21.25
welan	5.6	9.94824	7.4	10.8387
milla	13.8	48.5681	15.2	64.0133
suriya mara	6.8	10.0677	8.2	12.6043
nolaba	9.5	17.2715	11.3	27.4087
weera	14	50.6165	15.8	71.423
weera	15.8	71.423	17.4	93.5005
unknown	6	9.7773	8.1	12.3375
unknown	8.9	14.8408	10.3	21.25
unknown	7.6	11.2011	9.2	15.9969
ginisiriya	21.8	171.601	23.2	201.798
ginisiriya	25	244.418	27.2	302.304
unknown	5.3	10.2147	7.2	10.529
tharana	18.6	112.271	20.3	142.111
korakaha	16	73.9983	18.3	107.401
welan	29.6	372.723	31.3	427.194
damunu	36.1	601.542	37.9	674.747
damunu	26.8	291.305	28.2	330.723
sudu handun	6.6	9.91606	8.1	12.3375
nolaba	8	12.0839	10.3	21.25
sudu handun	5.1	10.4583	6.5	9.86
baththik	7.9	11.8434	9.2	15.9969
weera	21.8	171.601	22.4	184.226
welan	35.1	562.717	37.4	653.984
suriya mara	7.2	10.529	8.7	14.136
milla	10.8	24.1647	12.1	33.284
		3115.89		3709.73

## Sheet: Sheet6
12.6m					stump		bush			3m (1.5>5)			3m (30>1.5)			3m (30<)			Inasive spp
tree	DBh (2012)	biomass 2012	dbh (2018)	biomass 2019	2012	2018	spp	2012	2018	spp	2012	2018	spp	2012	2018	Spp	2012	2018	spp	2012	2018
akeshia	20.5	145.871	22.3	182.089	3		0			kudu daula	4		kahakona	1		nolaba	3		mana	12
ginisiria	8.2	12.6043	10.3	21.25						kudu daula	4
ginisiria	17.3	92.0219	18.9	117.261						welan	3
ginisiria	9.4	16.8335	11.6	29.5132
ginisiria	20.4	143.984	21.1	157.47
ginisiria	13.1	41.8136	15.2	64.0133
demata	45.3	1020.54	46.8	1099.42
ginisiria	14.8	59.337	15.5	67.6589
ginisiria	17.4	93.5005	19.1	120.653
ginisiria	13.1	41.8136	15.2	64.0133
thala	22.8	192.907	23.6	210.901
ginisiria	16.5	80.667	18.2	105.804
ginisiria	18.5	110.635	20.2	140.25
kudu dawula	10.4	21.8066	12.5	36.5378
kudu dawula	8.3	12.8843	10.3	21.25
kudu dawula	5.1	10.4583	7.1	10.3939
kudu dawula	5.6	9.94824	7.3	10.6773
kudu dawula	6.3	9.7874	8.1	12.3375
kudu dawula	6.6	9.91606	8.3	12.8843
kudu dawula	6.1	9.7675	8.2	12.6043
kudu dawula	5.7	9.88574	7.5	11.0133
kudu dawula	5	10.5998	6.9	10.1633
kudu dawula	7.1	10.3939	9.2	15.9969
akeshia	24	220.213	25.3	251.936
akeshia	23.4	206.323	25.4	254.468
akeshia	11.5	28.7985	13.2	42.739
kahakona	8	12.0839	9.7	18.1871
akeshia	27.5	310.691	29.4	366.565
akeshia	16.9	86.2391	18.4	109.011
welan	15.4	66.4305	17.1	89.1041
gonna	42.8	895.648	43.7	939.66
kudu dawula	5.5	10.0239	7.3	10.6773
kudu dawula	6.1	9.7675	8.4	13.1775
kudu dawula	7.9	11.8434	9.3	16.4086
ginisiria	14	50.6165	16.3	77.96
ginisiria	19.5	127.595	21.4	163.447
kahakona	8.3	12.8843	10.6	22.9593
kahakona	8	12.0839	10.4	21.8066
akeshia	31.2	423.884	0	34.4703
kahakona	9	15.213	10.9	24.7872
nolaba	8.4	13.1775	10.2	20.7066
kudu dawula	8.2	12.6043	9.8	18.6647
tharana		4694.1	5.1	10.4583
kudu dawula			5	10.5998
kudu dawula			5.6	9.94824
				5061.9

## Sheet: Sheet7
12.6m					stump		bush			3m (1.5>5)			3m (30>1.5)			3m (30<)			Inasive spp
tree	DBh (2012)	biomass 2012	dbh (2018)	biomass 2019	2012	2018	spp	2012	2018	spp	2012	2018	spp	2012	2018	Spp	2012	2018	spp	2012	2018
Nelli	8.6	13.8033	10.3	21.25	4	5	0			welan	3.6	4.1	welan	6	8	thora	36	48	lantana	5	20
Nelli	5.9	9.80028	7.8	11.6161						welan	3.1	3.7	lantana	4	12				mana	45	55
welan	16.5	80.667	18.2	105.804						kuratiya	2.6	2.9
kuratiya	5.1	10.4583	7.3	10.6773
damaniya	61.5	2029.33	61.7	2043.95
ginisiriya	35.1	562.717	36.6	621.449
daminiya	9.1	15.5984	11.5	28.7985
ketakela	55.7	1628.43	56.4	1674.47
ketakela	6.2	9.77086	8.3	12.8843
		4360.58		4530.89

## Sheet: Sheet8
12.6m					stump		bush			3m (1.5>5)			3m (30>1.5)			3m (30<)			Inasive spp
tree	DBh (2012)	biomass 2012	dbh (2018)	biomass 2019	2012	2018	spp	2012	2018	spp	2012	2018	spp	2012	2018	Spp	2012	2018	spp	2012	2018
poromala	17.2	90.5564	19.3	124.097	4	5	0			kudu daula	1.4	1.8	kududaula	12	17	kudu daula	42	56	ipil	0.5	1
damaniya	16.2	76.6263	18.5	110.635						mora	1.6	2.1
wal ugurassa	6.2	9.77086	8.3	12.8843						kata kela	2.3	2.6
ipil	9.4	16.8335	10.7	23.5554						kudu daula	4.1	4.4
ipil	8.9	14.8408	9.9	19.1554						ipil	2.4	2.9
unknown	7.3	10.6773	8.9	14.8408						ipil	1.9	2.5
kuratiya	6.6	9.91606	7.2	10.529						ipil	2.2	2.8
walkera	5.6	9.94824	7.4	10.8387						weera	3.1	3.4
poromala	5.9	9.80028	7	10.272
weera	44.6	984.738	44.9	1000
panakka	8.2	12.6043	9.8	18.6647
panakka	9.3	16.4086	10.4	21.8066
panakka	6.8	10.0677	8.3	12.8843
kudu dawula	6.1	9.7675	8.4	13.1775
kudu dawula	6.5	9.86	8.4	13.1775
kudu dawula	5.6	9.94824	7	10.272
mora	34.6	543.798	35.3	570.377
damaniya	36.3	609.465	37.8	670.568
damba	19.8	132.939	21.2	159.449
kudu dawula	7.8	11.6161	9.1	15.5984
walkera	5.4	10.1127	7.2	10.529
rathmal	5.7	9.88574	7.1	10.3939
damba	27.1	299.534	28.3	333.638
mora	38.7	708.652	39.9	761.091
mora	11.6	29.5132	12.4	35.7046
bhudaliya	6.5	9.86	8.4	13.1775
pera	5.4	10.1127	6.1	9.7675
ketakela	18.7	113.921	0	4017.08
nolaba	10.6	22.9593	0
		3814.73

## Sheet: Sheet9
12.6m					stump		bush			3m (1.5>5)			3m (30>1.5)			3m (30<)			Inasive spp
tree	DBh (2012)	biomass 2019	dbh (2018)	Biomass 2019	2012	2018	spp	2012	2018	spp	2012	2018	spp	2012	2018	Spp	2012	2018	spp	2012	2018
damunu	11.3	27.4087	12.9	40.0023	4	4	0			kudu daula	2.4	3.1	kududaula	4	6	monarakudumbiya	78	60	0
milla	36.3	609.465	37.1	641.685						bombu	1.5	2.1
ketakela	14.7	58.2008	16.2	76.6263						bombu	1.8	2.3
nuga	54.6	1557.4	55.3	1602.42						kudu daula	4.6	5.1
aththikka	36.1	601.542	37.1	641.685						milla	3.3	3.9
bhukenda	18.7	113.921	19.9	134.747
kududaula	5.6	9.94824	6.8	10.0677
ketakela	31.3	427.194	32.7	474.911
ketakela	6	9.7773	8.1	12.3375
milla	8.9	14.8408	10.2	20.7066
milla	5.8	9.83642	7.3	10.6773
tharana	7.7	11.402	9.2	15.9969
tharana	5.9	9.80028	7.8	11.6161
weera	13.4	44.6294	14.8	59.337
kududaula	51	1336.07	51.8	1383.78
walugurassa	6.2	9.77086	8.1	12.3375
bombu	5.7	9.88574	7.2	10.529
bombu	5.3	10.2147	7.8	11.6161
puwakgediya wel	5.4	10.1127	6.1	9.7675
kududaula	7.4	10.8387	8.8	14.4818
kududaula		4892.25	5.6	9.94824
kududaula			5.3	10.2147
				5215.48

## Sheet: Sheet10
12.6m					stump		bush			3m (1.5>5)			3m (30>1.5)			3m (30<)			Inasive spp
tree	DBh (2012)	biomass 2012	dbh (2018)	Biomass 2019	2012	2018	spp	2012	2018	spp	2012	2018	spp	2012	2018	Spp	2012	2018	spp	2012	2018
milla	24.3	227.336	26.4	280.517	0		0			atteriya	2.2	2.6	atteriya	8	8	atteriya	18	11	0
karawala kebilla	42.1	862.155	44.2	964.572						mora	1.8	2.8
milla	12.6	37.3842	14.3	53.7879						badulla	4.1	5.2
malkera	5.9	9.80028	7.2	10.529						milla	1.5	1.9
mora	6.3	9.7874	8.3	12.8843						ankenda	3.7	4.1
mora	5.4	10.1127	7.2	10.529						ankenda	1.6	2.2
tharana	5.5	10.0239	7.8	11.6161						atteriya	2.1	2.6
mora	5.6	9.94824	7.1	10.3939
mora	32.1	454.144	34.1	525.209
ankenda	28.6	342.46	30.4	397.882
badulla	8.9	14.8408	10.2	20.7066
badulla	8.3	12.8843	9.6	17.7227
ankenda	12.1	33.284	14.3	53.7879
aththikka	22.5	186.377	24.3	227.336
malkera	5.7	9.88574	7.1	10.3939
karapincha	12.3	34.8846	13.8	48.5681
mora	5.9	9.80028	7.3	10.6773
kalawel	5.2	10.3299	7.1	10.3939
atteriya	10.1	20.1764	12.4	35.7046
atteriya	6.3	9.7874	8.1	12.3375
		2315.4		2725.55
